# Supplementary material for: Knowledge of symptoms, time to presentation and barriers to medical help-seeking among Omani women diagnosed with breast cancer: a cross-sectional study
Source: PubMed Central journal article supplement — BMJ Open. 2021 Jan 21;11(1):e043976. doi: 10.1136/bmjopen-2020-043976 (PMC7825262; doi:10.1136/bmjopen-2020-043976), 2021-01-21
Supplement: bmjopen-2020-043976.draft_revisions.pdf [file bmjopen-2020-043976.draft_revisions.pdf]

# BMJ Open

BMJ Open is committed to open peer review. As part of this commitment we make the peer review history of every article we publish publicly available.

When an article is published we post the peer reviewers' comments and the authors' responses online. We also post the versions of the paper that were used during peer review. These are the versions that the peer review comments apply to.

The versions of the paper that follow are the versions that were submitted during the peer review process. They are not the versions of record or the final published versions. They should not be cited or distributed as the published version of this manuscript.

BMJ Open is an open access journal and the full, final, typeset and author-corrected version of record of the manuscript is available on our site with no access controls, subscription charges or pay-per-view fees (<http://bmjopen.bmj.com>).

If you have any questions on BMJ Open's open peer review process please email [info.bmjopen@bmj.com](mailto:info.bmjopen@bmj.com)

# BMJ Open

## Knowledge of symptoms, time to presentation and barriers to medical help-seeking among Omani women diagnosed with breast cancer - A cross-sectional study

|                               |                                                                                                                                                                                                                                                                                                                                                                                                                                                                                                                                                                                                                                                   |
|-------------------------------|---------------------------------------------------------------------------------------------------------------------------------------------------------------------------------------------------------------------------------------------------------------------------------------------------------------------------------------------------------------------------------------------------------------------------------------------------------------------------------------------------------------------------------------------------------------------------------------------------------------------------------------------------|
| Journal:                      | <i>BMJ Open</i>                                                                                                                                                                                                                                                                                                                                                                                                                                                                                                                                                                                                                                   |
| Manuscript ID                 | bmjopen-2020-043976                                                                                                                                                                                                                                                                                                                                                                                                                                                                                                                                                                                                                               |
| Article Type:                 | Original research                                                                                                                                                                                                                                                                                                                                                                                                                                                                                                                                                                                                                                 |
| Date Submitted by the Author: | 19-Aug-2020                                                                                                                                                                                                                                                                                                                                                                                                                                                                                                                                                                                                                                       |
| Complete List of Authors:     | Al-Azri, Mohammed; Sultan Qaboos University, Family Medicine and Public Health;<br>Al-Baimani, Khalid ; Sultan Qaboos University, Oncology Unit, Department of Medicine<br>Al-Awaisi, Huda ; Sultan Qaboos University, Nursing Directorate, Sultan Qaboos University Hospital<br>Al-Mandhari, Zahid ; The Royal Hospital<br>Al-Khamayasi, Jasem ; Sultan Qaboos University, College of Medicine and Health Sciences<br>Al-Lawati, Yaseen ; Sultan Qaboos University, College of Medicine and Health Sciences<br>Panchatcharam, Sathiya Murthi ; Oman Medical Speciality Board, Research Section, Medical Simulation and Skills Development Centre |
| Keywords:                     | PREVENTIVE MEDICINE, Adult oncology < ONCOLOGY, Breast tumours < ONCOLOGY                                                                                                                                                                                                                                                                                                                                                                                                                                                                                                                                                                         |
|                               |                                                                                                                                                                                                                                                                                                                                                                                                                                                                                                                                                                                                                                                   |

SCHOLARONE™  
Manuscripts

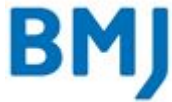

I, the Submitting Author has the right to grant and does grant on behalf of all authors of the Work (as defined in the below author licence), an exclusive licence and/or a non-exclusive licence for contributions from authors who are: i) UK Crown employees; ii) where BMJ has agreed a CC-BY licence shall apply, and/or iii) in accordance with the terms applicable for US Federal Government officers or employees acting as part of their official duties; on a worldwide, perpetual, irrevocable, royalty-free basis to BMJ Publishing Group Ltd ("BMJ") its licensees and where the relevant Journal is co-owned by BMJ to the co-owners of the Journal, to publish the Work in this journal and any other BMJ products and to exploit all rights, as set out in our [licence](#).

The Submitting Author accepts and understands that any supply made under these terms is made by BMJ to the Submitting Author unless you are acting as an employee on behalf of your employer or a postgraduate student of an affiliated institution which is paying any applicable article publishing charge ("APC") for Open Access articles. Where the Submitting Author wishes to make the Work available on an Open Access basis (and intends to pay the relevant APC), the terms of reuse of such Open Access shall be governed by a Creative Commons licence – details of these licences and which [Creative Commons](#) licence will apply to this Work are set out in our licence referred to above.

Other than as permitted in any relevant BMJ Author's Self Archiving Policies, I confirm this Work has not been accepted for publication elsewhere, is not being considered for publication elsewhere and does not duplicate material already published. I confirm all authors consent to publication of this Work and authorise the granting of this licence.

1  
2  
3 **Knowledge of symptoms, time to presentation and barriers to medical help-**  
4 **seeking among Omani women diagnosed with breast cancer - A cross-**  
5 **sectional study**  
6  
7  
8  
9

10  
11 Mohammed Al-Azri<sup>1\*</sup>, Khalid Al-Baimani<sup>2</sup>, Huda Al-Awaisi<sup>3</sup>, Zahid Al-Mandhari<sup>4</sup>, Jasem Al-  
12 Khamayasi<sup>5</sup>, Yaseen Al-Lawati<sup>5</sup>, Sathiya Murthi Panchatcharam<sup>6</sup>  
13  
14

15  
16 Correspondence to Dr Mohammed Al-Azri; mhalazri@squ.edu.om  
17  
18  
19  
20  
21  
22  
23  
24  
25  
26  
27  
28  
29  
30  
31  
32  
33  
34  
35  
36  
37  
38  
39  
40  
41  
42  
43  
44  
45  
46  
47  
48  
49  
50  
51  
52  
53  
54  
55  
56  
57  
58  
59  
60

For peer review only

## ABSTRACT

**Objectives** To identify knowledge of breast cancer (BC) symptoms, time taken to consult a doctor and factors contributing to delays in medical help-seeking.

**Design** A cross-sectional study of Omani women diagnosed with BC.

**Setting** The two main teaching hospitals in Oman, Royal Hospital and Sultan Qaboos University Hospital.

**Participants** All adult Omani women recently diagnosed with BC.

**Tools** The Breast Cancer Awareness Measure and International Cancer Benchmarking Partnership questionnaire were used to collect data.

**Results** A total of 300 women with BC participated (response rate: 91.0%). Mean age at diagnosis was  $43.0 \pm 12.50$  years and the majority (60.5%) were diagnosed at stages II, III or IV. Although most women (74.4%) recognised breast/armpit lumps to be a symptom of BC, less than half identified other symptoms, including breast/armpit pain (44.0%), changes in the position of the nipple (36.2%), redness (31.7%), fatigability (26.3%), weight loss (23.4%) and loss of appetite (20.8%). While most (91.6%) were aware that BC could be cured if detected early, only 66.4% sought medical help within a month of developing symptoms. Initial responses to symptoms included informing husbands (40.2%) or family members (36.5%). Barriers to seeking medical help included feeling scared (68.9%) and worried about what the doctor might find (62.8%). Highly educated women were more likely to recognise the following as BC symptoms: changes in nipple position (odds ratio (OR): 0.16, 95% confidence interval (CI): 0.03–0.81), breast pain (OR: 0.10, 95% CI 0.01–0.86) and unexplained weight loss (OR: 0.18, 95% CI: 0.04–0.88) (all  $p < 0.05$ ).

**Conclusions** Although many Omani women with BC were aware of the importance of early diagnosis, most demonstrated inadequate knowledge of symptoms, did not prioritise seeking medical help and reported emotional barriers to help-seeking. More educational measures are needed to improve symptom recognition and address help-seeking barriers to minimise delays in diagnosis.

### Strengths and limitations of this study

- This is the first study conducted in Oman to explore time taken to seek medical help and barriers to seeking medical help among women diagnosed with breast cancer (BC).
- Although women were aware of the importance of early BC detection and that delays in seeking medical help could lead to complications, most presented at relatively advanced stages, with the cause for delay usually being due to the patients themselves.
- The initial response upon first noticing possible BC symptoms was to inform husbands and family members rather than seeking medical help.
- The possibility of recall and response bias could not be ruled out due to the use of self-reported questionnaire measures for data collection.
- While the Arabic version of the final questionnaire was assessed for reliability, the validity of this measure was not determined.

## BACKGROUND

Worldwide, breast cancer (BC) accounts for 10% of all cancers diagnosed annually and approximately 15% of all cancer deaths among women.[1] Despite efforts to improve the early detection of BC, nearly one-third of women worldwide have either regional or distant metastasis at the time of diagnosis.[2] In the Gulf Cooperation Council (GCC) region, BC is the most commonly diagnosed cancer among women, accounting for 13–35% of all cancers; moreover, approximately half of BC patients are under 50 years of age at the time of diagnosis, with a median age of 49–52 years compared to 63 years in Western countries.[3] In addition, approximately 58.0% of women in GCC countries present with advanced stages of BC at diagnosis (45% with regional metastasis and 12.8% with distant metastasis).[4]

Nonetheless, there is a high chance of a cure if BC is detected early and adequately treated; for example, women who begin treatment within 3–5 months of developing symptoms have significantly worse survival rates compared to those who seek medical help in <3 months.[5, 6] Delays in cancer diagnosis are defined as the time interval between the first symptom and the start of treatment.[7] The most common causes of delay are usually because patients do not correctly identify cancer symptoms or act on them to seek medical help.[8, 9] Low awareness of BC symptoms, lack of access to care, unavailability or non-participation in BC screening, fatalism, negative perceptions of BC and cultural beliefs are all factors which contribute to delays in seeking medical help on the part of patients.[2, 8, 10-12]

In Oman, BC is the most commonly diagnosed cancer and accounts for 12.79% of all cancers and 21.2% of cancers affecting women.[13] Recently, the incidence of BC has almost doubled from 13.6 cases per 100,000 women in 1996 to 26.9 in 2015.[13] Like other GCC countries, the majority of women diagnosed with BC in Oman are younger (median age: 49 years) and present at advanced stages (i.e. stages III and IV), with a low five-year survival rate (63%).[14] Several factors contribute to delays in cancer diagnosis in Oman, including the lack of a national screening programme, social stigma, the influence of family, spouses and friends in treatment decision-making and the prevalence of traditional medicine and medical tourism.[8, 15-17] Identifying specific factors which contribute to delays in BC diagnosis are crucial to help improve patient outcomes. The aim of this study was therefore to identify knowledge of BC symptoms, time taken to seek medical help and barriers to medical help-seeking among Omani women diagnosed with BC.

## Methods

### Study setting

This cross-sectional study was carried out between November 2018 and April 2019 at the National Oncology Centre of the Royal Hospital (RH) and the Oncology Unit of the Sultan Qaboos University Hospital (SQUH), both of which are located in Muscat, the capital city of Oman. These hospitals represent the two primary oncology centres in Oman and provide comprehensive treatment (including surgery, chemotherapy and radiotherapy) and palliative care to patients diagnosed with all types of cancer, including BC.[18] Patients diagnosed at other regional hospitals of Oman are referred to either RH or SQUH for treatment.

### Sample size estimation and recruitment

According to previous data from the National Cancer Registry from 1999 to 2015, the number of BC patients in 2018 and 2019 was estimated to be 271 based on a linear prediction model.[13] Thus, all Omani women diagnosed with BC during the year prior to data collection were targeted for inclusion in the current study, as having been diagnosed more than a year previously could have resulted in recall bias.

A total of 330 adult Omani women aged  $\geq 18$  years and diagnosed with BC within the preceding year at RH or SQUH were identified from the electronic hospital systems and invited to participate in the study. Patients were informed that participation in the study was optional and would not affect the medical care they received. Only women who agreed to participate and who attended the outpatient oncology clinics or day care units or those who were admitted to the wards during the study period were included. Women who were in obvious distress, pain or admitted because of complications such as febrile neutropenia were excluded. All participants signed a consent form prior to taking part in the study.

### Tool used to measure BC symptom knowledge and barriers to seeking medical help

The Breast Module of the Cancer Awareness Measure (Breast-CAM) was developed in the UK and is a valid and reliable instrument for measuring BC awareness in women.[19, 20] It has moderate to good test-retest reliability for most items, with a good discriminatory index of BC knowledge and can be administered either face-to-face or via telephone interviews.[19, 20] The Breast-CAM includes three different sections which independently measure and assess knowledge of BC symptoms, anticipated delays before contacting the doctor and barriers to seeking medical help (including both emotional, practical and service-related barriers).[19]



### **Tool used to measure time taken to seek medical help**

In Europe, the International Cancer Benchmarking Partnership (ICBP) developed a module to measure the overall time interval between the first possible symptom of cancer and the start of treatment.[7] This overall interval is then divided into subintervals depending on the factor responsible for the delay, including delays related to the patient themselves, the diagnostic process and the treatment or management process. The ICBP questionnaire has been used in several international studies to investigate root causes of delays in cancer diagnoses.[21, 22]

For the purposes of the current study, the Breast-CAM and ICBP tools were combined into one questionnaire in order to assess knowledge of BC symptoms, time taken to consult a doctor, and barriers to seeking medical help among Omani women. Sociodemographic variables in the modules were modified to be relevant to Omani society and the national healthcare system. Both the Breast-CAM and ICBP tools were translated from English to Arabic and then back-translated into English. The combined questionnaire was completed by two researchers during face-to-face interviews conducted with the participants. In order to ensure the clarity and reliability of the questionnaire, a pilot study was conducted of the first 30 women enrolled in the study. Based on a standardised item analysis, Cronbach's alpha ( $\alpha$ ) values of the Arabic versions of the Breast-CAM tool and ICBP questionnaire were 0.88 and 0.85, respectively.

### **Statistical analysis**

Data were analysed using SPSS software, version 22 (IBM Corp., Armonk, New York). Descriptive data were presented as numbers and percentages. A Chi-squared ( $\chi^2$ ) test was used to determine associations between sociodemographic characteristics and the responses of the participants. A binary logistic regression model was used to adjust for the effect of certain factors, with the findings presented as odds ratios (ORs) and 95% confidence intervals (CIs). A p value of  $<0.05$  was considered significant.

## **Results**

### **Characteristics of the participants**

A total of 300 women with BC participated in the study out of 333 eligible subjects, resulting in a response rate of 91.0%. The mean age was  $47.0 \pm 12.2$  years (median: 45.0 years, range: 24–84 years). The majority were below the age of 50 years (66.1%) and married (76.2%). Over one-third were residents of Muscat (34.3%) and had no formal education (35.2%). Overall, 81

1  
2  
3 patients (27.1%) reported having a family history of BC, of which the majority (76.3%) were  
4 first- or second-degree relatives. The mean age at BC diagnosis was  $43.0 \pm 12.50$  years. Most  
5 women (60.5%) were diagnosed with BC at stages II, III or IV. The women were receiving  
6 various treatments modalities at the time of the interviews, including chemotherapy,  
7 radiotherapy and hormonal therapy (table 1).  
8  
9  
10  
11  
12

### 13 **Knowledge of BC symptoms and barriers to seeking medical help**

14  
15 The majority of women were aware that BC could be cured if detected sufficiently early  
16 (91.6%) and that delays in seeking medical treatment could adversely affect their health  
17 (91.6%). Moreover, the majority were aware that missing or delaying an appointment to visit  
18 the doctor could cause delays in treatment (90.2%) and that delays in diagnosis could lead to  
19 complications (89.0%). On the other hand, less than half of the women (43.8%) had been aware  
20 of BC prior to their diagnosis. Under one-third of the cohort thought that a BC diagnosis could  
21 lead to social stigma (24.2%) and that society had an effect in delaying BC treatment (30.2%)  
22 (figure 1).  
23  
24  
25  
26  
27  
28  
29

30  
31 The majority of women (74.7%) were aware that lumps in the breast or armpit could be  
32 symptoms of BC. However, less than half were aware that pain in the breast or armpit (44.0%),  
33 changes in the position of the nipple (36.2%), redness of the skin of the breast (31.7%),  
34 fatigability (26.3%), unexplained weight loss (23.4%) and loss of appetite (20.8%) were  
35 possible BC symptoms (figure 2). The most commonly reported barriers to seeking medical  
36 help were fear (68.9%), followed by anxiety over what the doctor might find (62.8%), having  
37 too many other things to worry about (43.6%), embarrassment (26.0%), being too busy to make  
38 time to go to the doctor (19.5%), difficulties arranging transport (13.7%), difficulties  
39 explaining their symptoms to the doctor (12.4%) and worry over wasting the doctor's time  
40 (8.1%) (figure 3).  
41  
42  
43  
44  
45  
46  
47  
48  
49

### 50 **Associations between sociodemographic characteristics and responses**

51  
52 The binary logistic regression analysis indicated that women who had no formal education  
53 were less likely than those who were highly educated (i.e. college and above) to recognise that  
54 the following were potential symptoms of BC: changes in the position of the nipple (OR 0.16  
55 (95% CI 0.03–0.81)  $p < 0.05$ ), pain in the breast or armpit (OR 0.10 (95% CI 0.01–0.86)  $p$   
56  $< 0.05$ ) and unexplained weight loss (OR 0.18 (95% CI 0.04–0.88)  $p < 0.05$ ). On the other hand,  
57 women educated to the high school level were more likely than college-educated women to  
58  
59  
60

1  
2  
3 recognise that a lump in the breast or armpit (OR 7.28 (95% CI 1.06–50.19)  $p < 0.05$ ) and  
4 fatigability (OR 3.82 (95% CI 1.08–13.58)  $p < 0.05$ ) could be BC symptoms.  
5  
6  
7

8 Employed women were more likely than unemployed women to recognise that fatigability  
9 could be a symptom of BC (OR 4.18 (95% CI 1.34–13.05)  $p < 0.05$ ). In addition, women in the  
10 lowest income category were more likely than those in the highest category to recognise that  
11 pain in the breast or armpit (OR 4.14 (95% CI 1.14–15.12)  $p < 0.05$ ) and redness (OR 3.58  
12 (95% CI 1.11–11.52)  $p < 0.05$ ) could be BC symptoms (table 2).  
13  
14  
15  
16  
17

### 18 **Time taken to seek medical help**

19 At the time of the interviews, most women (71.0%) had been diagnosed with BC less than six  
20 months previously. Upon first noticing possible BC symptoms, the initial response of most  
21 women were to inform their husband (40.2%), followed by informing other family members  
22 (36.5%) and seeing a doctor at a government hospital (8.4%), local health centre (LHC) (8.1%)  
23 or private facility (2.4%); however, several women reported traveling abroad (2.0%) or using  
24 traditional or herbal remedies (0.7%). Less than half of the cohort consulted a doctor within  
25 two weeks of developing possible BC symptoms (46.6%) and more than half of them (65.0%)  
26 were able to get an appointment to see a doctor within two weeks  
27  
28  
29  
30  
31  
32  
33  
34  
35

36 However, the majority were diagnosed with BC immediately after their first visit to an LHC  
37 (67.7%) or after their first or second visit to government hospitals (51.2%). Moreover, most  
38 women were able to see specialists at government hospitals within two weeks of referral  
39 (71.3%) and received confirmation of the diagnosis within two weeks of their first appointment  
40 (65.7%). Finally, more than half (58.5%) were able to receive their first treatment within two  
41 weeks of their diagnosis (table 3).  
42  
43  
44  
45  
46  
47

### 48 **Discussion**

49 To our knowledge, this is the first study conducted in Oman to explore knowledge of BC  
50 symptoms, time taken to seek medical help and barriers to seeking medical help among women  
51 with BC. The mean age of the women diagnosed with BC in this study was 43 years; this is  
52 much lower than the average age reported in developed countries (mean age: 63 years) and  
53 slightly below that reported in other Arab countries (mean age: 49–52 years).[3] A previous  
54 study conducted in Oman shared similar findings in which the mean age of women diagnosed  
55 with BC was 47 years, with one-third being under 40 years.[14] The younger age of  
56  
57  
58  
59  
60

1  
2  
3 presentation of women with BC in Oman might be attributable to various factors, including  
4 genetic background, the adoption of more 'Westernised' lifestyles (including reduced levels of  
5 physical activity and higher rates of obesity), a decrease in breastfeeding and the presence of  
6 potential carcinogens in the local environment.[23]  
7  
8  
9

10  
11 Although the vast majority of women in this study were aware of the importance of early  
12 BC detection and that delays in seeking medical help could lead to complications, most  
13 nevertheless presented at relatively advanced stages (i.e. stages II, III or IV). Previous studies  
14 have reported similar findings.[14, 24] Although a large proportion of women in this study  
15 were able to recognise that lumps in the breast or armpit were a possible symptom of BC, the  
16 majority were not aware of other symptoms such as fatigability, unexplained weight loss or  
17 loss of appetite. Indeed, less than half of the women reported having been aware of or  
18 knowledgeable regarding BC prior to their own diagnosis. Researchers have recommended  
19 incorporating information regarding cancer risk factors and symptoms into the school  
20 curriculum so as to increase cancer knowledge in adulthood.[25]  
21  
22  
23  
24  
25  
26  
27  
28  
29

30  
31 Poor awareness of BC symptoms is a predominant reason for delayed presentation to a  
32 doctor, particularly if symptoms are atypical in nature.[9] Most women with BC more  
33 commonly recognise obvious symptoms, such as lumps, compared to more ambiguous  
34 symptoms, such as tiredness, unexplained weight loss and reduced appetite; in fact, delays in  
35 presentation are more likely to occur in BC cases in which the symptoms do not include a breast  
36 lump.[6, 11] Furthermore, knowledge of BC symptoms is a prerequisite for prompt help-  
37 seeking behaviours, particularly if the symptom is perceived to be serious.[26] Uneducated  
38 women in our study were less likely to recognise certain BC symptoms, such as changes in the  
39 position of the nipple, breast or armpit pain and unexplained weight loss. Similar findings have  
40 also been noted among Omani women with ovarian cancer, with more educated women being  
41 more likely to recognise specific symptoms compared to those who were less educated.[27]  
42  
43  
44  
45  
46  
47  
48  
49  
50

51 More than half of women in our study who sought medical help at LHCs or government  
52 hospitals were diagnosed with BC after their first or second visit, indicating that the cause for  
53 any delays in diagnosis was likely due to the patients themselves. Other researchers have  
54 highlighted that not seeking early medical help is a predictor of delayed diagnosis.[8, 28]  
55 Furthermore, the majority of women who were seen at LHCs in the present study were  
56 subsequently seen by specialists within two weeks of referral, with the BC diagnosis confirmed  
57  
58  
59  
60

1  
2  
3 within another two weeks. Once again, this indicates that factors related to the local health  
4 system do not seem to play a major role in delaying BC diagnoses in Oman. Referral policies  
5 covering specific aspects of patient care are well established to oversee the transfer of patients  
6 from one healthcare setting to another for management.[29] Nonetheless, cancer patients in  
7 Oman, much like those in neighbouring GCC countries, often choose to seek medical help  
8 abroad (i.e. in countries like Thailand or India); this trend often causes delays in diagnosis,  
9 with many patients returning home with additional complications.[15]  
10  
11  
12  
13  
14  
15  
16

17 For the majority of women in the current study, their initial response upon first noticing  
18 possible BC symptoms was to inform their husbands and family members. Becoming aware of  
19 possible symptoms of a life-threatening disease is often associated with feelings of emotional  
20 distress, anxiety and depression; hence, sharing this information with close family members  
21 might offer some emotional relief and support.[30, 31] Indeed, most women in our study  
22 prioritised sharing their symptoms with husbands or family members over consulting a doctor.  
23 This finding might be related to prevailing sociocultural attitudes which are based on a strong  
24 sense of moral responsibility and familial obligation, particularly when it comes to illness.[17]  
25 Furthermore, Omani women diagnosed with BC often rely on their families for emotional,  
26 physical and financial support, which also plays a role in treatment decision-making.[16, 17]  
27 However, the involvement of family members in medical decisions and treatment options can  
28 sometimes delay diagnoses, particularly if these individuals encourage patients to seek medical  
29 treatment abroad or pursue alternative or traditional remedies.[8, 32]  
30  
31  
32  
33  
34  
35  
36  
37  
38  
39  
40

41 Although more than half of the women in our study sought medical help within one month  
42 of developing BC symptoms, most nevertheless presented at an advanced stage by the time  
43 they were diagnosed. Various psychosocial and cultural beliefs have been attributed to the  
44 delayed presentation of BC cases.[15, 28, 30] A previous study from Oman showed that women  
45 with BC experienced severe psychosocial distress, including fear of death, social isolation,  
46 anxiety regarding the side-effects of treatment and fear that the cancer might spread or interfere  
47 with their daily lives.[15] Women who express explicit fears about the consequences of  
48 diagnosis and treatment are more reluctant to seek medical help, resulting in a higher chance  
49 of delays in diagnosis.[11] Similarly, many women in our study reported emotional barriers  
50 that might contribute to delays in consulting a doctor, such being scared, embarrassed or  
51 worried about what the doctor might find. Symptom appraisal and perception of their severity  
52 is a predictor of decisions to seek medical help.[28]  
53  
54  
55  
56  
57  
58  
59  
60

1  
2  
3 This study has certain limitations. First, it was difficult to objectively assess delays in BC  
4 presentation, diagnosis and treatment due to variations in how people perceive and define time  
5 intervals.[33] Furthermore, many patients in Oman often choose to access healthcare in non-  
6 integrated settings; for instance, by attending a mixture of government facilities, private  
7 facilities and facilities abroad. Thus, it was difficult in some cases to track the time taken  
8 throughout the diagnostic pathway using the three usual component intervals of delay (i.e.  
9 patient, primary care and secondary care delays). Apart from self-reported information from  
10 the patients, there were no other methods available to measure delays in the absence of  
11 electronic or written tracking data.  
12  
13  
14  
15  
16  
17  
18  
19

20  
21 Second, while we recruited all Omani women diagnosed with BC within the previous year  
22 to satisfy the sample size requirements, the possibility of recall bias cannot be ruled out. Third,  
23 although the Arabic version of the combined questionnaire (which incorporated both the  
24 Breast-CAM and ICBP tools) was tested for reliability and demonstrated a satisfactory  
25 Cronbach's alpha ( $\alpha$ ) coefficient, we could not guarantee its validity, which was beyond the  
26 scope of this research. Finally, we used the Breast-CAM section to measure knowledge of BC  
27 symptoms and barriers to seeking medical help among patients who had already been  
28 diagnosed with BC; as such, we could not rule out potential bias in that the participants might  
29 have more knowledge of BC symptoms compared to other Omani women.  
30  
31  
32  
33  
34  
35  
36  
37

### 38 **Conclusion**

39 Omani women with BC demonstrated low levels of knowledge of BC symptoms and  
40 experienced several emotional barriers to seeking medical help; moreover, the majority were  
41 diagnosed at advanced stages. Despite national efforts to increase BC awareness, further  
42 educational initiatives are needed. Healthcare professionals should visit schools to raise  
43 awareness of BC symptoms and promote early help-seeking behaviours among female students  
44 in different regions of Oman. Employing both social and traditional media campaigns in LHCs  
45 and hospitals might also help to increase BC knowledge. Finally, healthcare professionals  
46 should make more efforts to build a trusting and cooperative relationship with female patients  
47 in order to help address emotional barriers to medical help-seeking, thereby encouraging them  
48 to disclose potential symptoms and thus reducing delays in diagnosis.  
49  
50  
51  
52  
53  
54  
55  
56  
57  
58  
59  
60



### **Author affiliations**

<sup>1</sup>Department of Family Medicine and Public Health, College of Medicine and Health Sciences, Sultan Qaboos University, Muscat, Oman.

<sup>2</sup>Oncology Unit, Department of Medicine, Sultan Qaboos University Hospital, Muscat, Oman.

<sup>3</sup>Nursing Directorate, Sultan Qaboos University Hospital, Muscat, Oman.

<sup>4</sup>National Oncology Centre, Radiotherapy Department, Royal Hospital, Muscat, Oman.

<sup>5</sup>College of Medicine and Health Sciences, Sultan Qaboos University, Muscat, Oman.

<sup>6</sup>Research Section, Medical Simulation and Skills Development Centre, Oman Medical Specialty Board, Muscat, Oman

### **Acknowledgements**

The authors are grateful to the participating patients and to the authorities at RH and SQUH for allowing this study to take place. They are also grateful to the College of Medicine and Health Sciences at Sultan Qaboos University for funding the study.

### **Contributors**

MA, KA, HA, ZM, JA and YA conceived of the study and contributed to its design and implementation. JA and YA collected data. SMP performed the statistical analysis. MA drafted the manuscript. All authors read and approved the final version of the manuscript.

### **Funding**

This study was funded by an internal grant from the College of Medicine and Health Sciences, Sultan Qaboos University.

### **Patient and public involvement**

Patients and/or the public were not involved in the design, conduct, reporting or dissemination of this research.

### **Patient consent for publication**

Not applicable as no details regarding individual patients have been reported in the manuscript.

### **Ethical approval**

The study received ethical approval from the Medical Research and Ethics Committee of the College of Medicine and Health Sciences, Sultan Qaboos University (MREC #1809) as well

1  
2  
3 as the Scientific Research Committee of the Royal Hospital (SRC #87/2018). Informed consent  
4 was obtained from all participants prior to their inclusion in the study.  
5  
6  
7

### 8 **Data availability statement**

9  
10 The datasets used and/or analysed during this study are available from the corresponding author  
11 upon reasonable request.  
12  
13  
14

### 15 **Competing interests**

16  
17 The authors declare that they have no competing interests.  
18  
19

### 20 **References**

- 21  
22 1. World Health Organization. Cancer: Breast cancer. Available:  
23 <https://www.who.int/cancer/prevention/diagnosis-screening/breast-cancer/en/> [Accessed  
24 July 2020].  
25  
26  
27 2. Facione NC, Miaskowski C, Dodd MJ, *et al*. The self-reported likelihood of patient delay  
28 in breast cancer: new thoughts for early detection. *Prev Med* 2002;34:397–407.  
29 doi:10.1006/pmed.2001.0998.  
30  
31 3. Donnelly TT, Al Khater A-H, Al-Bader SB, *et al*. Arab women’s breast cancer screening  
32 practices: a literature review. *Asian Pac J Cancer Prev* 2013;14:4519–28.  
33 doi:10.7314/apjcp.2013.14.8.4519.  
34  
35 4. El Saghir NS, Khalil MK, Eid T, *et al*. Trends in epidemiology and management of breast  
36 cancer in developing Arab countries: a literature and registry analysis. *Int J Surg*  
37 2007;5:225–33. doi:10.1016/j.ijso.2006.06.015.  
38  
39 5. Harford JB. Breast-cancer early detection in low-income and middle-income countries:  
40 do what you can versus one size fits all. *Lancet Oncol* 2011;12:306–12.  
41 doi:10.1016/S1470-2045(10)70273-4.  
42  
43 6. Richards MA, Westcombe AM, Love SB, *et al*. Influence of delay on survival in patients  
44 with breast cancer: a systematic review. *Lancet* 1999;353:1119–26. doi:10.1016/s0140-  
45 6736(99)02143-1.  
46  
47 7. Butler J, Foot C, Bomb M, *et al*. The International Cancer Benchmarking Partnership: an  
48 international collaboration to inform cancer policy in Australia, Canada, Denmark,  
49 Norway, Sweden and the United Kingdom. *Health Policy* 2013;112:148–55.  
50 doi:10.1016/j.healthpol.2013.03.021.  
51  
52  
53  
54  
55  
56  
57  
58  
59  
60



- 1
  - 2
  - 3
  - 4
  - 5
  - 6
  - 7
  - 8
  - 9
  - 10
  - 11
  - 12
  - 13
  - 14
  - 15
  - 16
  - 17
  - 18
  - 19
  - 20
  - 21
  - 22
  - 23
  - 24
  - 25
  - 26
  - 27
  - 28
  - 29
  - 30
  - 31
  - 32
  - 33
  - 34
  - 35
  - 36
  - 37
  - 38
  - 39
  - 40
  - 41
  - 42
  - 43
  - 44
  - 45
  - 46
  - 47
  - 48
  - 49
  - 50
  - 51
  - 52
  - 53
  - 54
  - 55
  - 56
  - 57
  - 58
  - 59
  - 60
8. Al-Azri MH. Delay in cancer diagnosis: causes and possible solutions. *Oman Med J* 2016;31:325–6. doi:10.5001/omj.2016.65.
9. Macleod U, Mitchell ED, Burgess C, *et al*. Risk factors for delayed presentation and referral of symptomatic cancer: evidence for common cancers. *Br J Cancer* 2009;101:S92–101. doi:10.1038/sj.bjc.6605398.
10. Hisham AN, Yip C-H. Overview of breast cancer in Malaysian women: a problem with late diagnosis. *Asian J Surg*. 2004;27:130–3. doi:10.1016/S1015-9584(09)60326-2.
11. Gorin SS, Heck JE, Cheng B, *et al*. Delays in breast cancer diagnosis and treatment by racial/ethnic group. *Arch Intern Med*. 2006;166:2244–52. doi:10.1001/archinte.166.20.2244.
12. Aziz NM, Rowland JH. Cancer survivorship research among ethnic minority and medically underserved groups. *Oncol Nurs Forum*. 2002;29:789–801. doi:10.1188/02.ONF.789-801.
13. Al-Lawati JA, Al-Zakwani I, Fadhil I, *et al*. Cancer incidence in Oman (1996-2015). *Oman Med J*. 2019;34:271–3. doi:10.5001/omj.2019.55.
14. Kumar S, Burney IA, Al-Ajmi A, *et al*. Changing trends of breast cancer survival in Sultanate of Oman. *J Oncol*. 2011;2011:316243. doi:10.1155/2011/316243.
15. Al-Azri M, Al-Awisi H, Al-Rasbi S, *et al*. Psychosocial impact of breast cancer diagnosis among Omani women. *Oman Med J*. 2014;29:437–44. doi:10.5001/omj.2014.115.
16. Al-Bahri A, Al-Moundhri M, Al-Mandhari Z, *et al*. The role of patients' families in treatment decision-making among adult cancer patients in the Sultanate of Oman. *Eur J Cancer Care (Engl)*. 2018;27:e12845. doi:10.1111/ecc.12845.
17. Al-Bahri A, Al-Moundhri M, Al-Mandhari Z, *et al*. Role of the family in treatment decision-making process for Omani women diagnosed with breast cancer. *Patient Educ Couns*. 2019;102:352–9. doi:10.1016/j.pec.2018.08.026.
18. Burney IA, Al Moundhri MS, Rizvi AJ, *et al*. Outcome as a measure of quality of care in oncology: experience at Sultan Qaboos University Hospital, Oman. *Sultan Qaboos Univ Med J*. 2008;8:27–36.
19. Cancer Research UK. Breast Module of the Cancer Awareness Measure (Breast-CAM) Toolkit. Available: [https://www.cancerresearchuk.org/sites/default/files/health\\_professional\\_breast\\_cam\\_toolkit\\_09.02.11.pdf](https://www.cancerresearchuk.org/sites/default/files/health_professional_breast_cam_toolkit_09.02.11.pdf) [Accessed July 2020].

- 1  
2  
3 20. Linsell L, Forbes LJJ, Burgess C, *et al.* Validation of a measurement tool to assess  
4 awareness of breast cancer. *Eur J Cancer.* 2010;46:1374–81.  
5  
6 doi:10.1016/j.ejca.2010.02.034.  
7
- 8 21. Forbes LJJ, Simon AE, Warburton F, *et al.* Differences in cancer awareness and beliefs  
9 between Australia, Canada, Denmark, Norway, Sweden and the UK (the International  
10 Cancer Benchmarking Partnership): do they contribute to differences in cancer survival?  
11 *Br J Cancer.* 2013;108:292–300. doi:10.1038/bjc.2012.542.  
12  
13
- 14 22. Rose PW, Hamilton W, Aldersey K, *et al.* Development of a survey instrument to  
15 investigate the primary care factors related to differences in cancer diagnosis between  
16 international jurisdictions. *BMC Fam Pract.* 2014;15:122. doi:10.1186/1471-2296-15-  
17 122.  
18  
19
- 20 23. Kim Y, Yoo K-Y, Goodman MT. Differences in incidence, mortality and survival of  
21 breast cancer by regions and countries in Asia and contributing factors. *Asian Pac J*  
22 *Cancer Prev.* 2015;16:2857–70. doi:10.7314/apjcp.2015.16.7.2857.  
23  
24
- 25 24. Al-Azri M, Al-Rubaie K, Al-Ghafri S, *et al.* Barriers and attitudes toward breast cancer  
26 screening among Omani women. *Asian Pac J Cancer Prev.* 2020;21:1339–47.  
27  
28 doi:10.31557/APJCP.2020.21.5.1339.  
29
- 30 25. Karayurt O, Ozmen D, Cetinkaya AC. Awareness of breast cancer risk factors and  
31 practice of breast self examination among high school students in Turkey. *BMC Public*  
32 *Health.* 2008;8:359. doi:10.1186/1471-2458-8-359.  
33  
34
- 35 26. Quaife SL, Forbes LJJ, Ramirez AJ, *et al.* Recognition of cancer warning signs and  
36 anticipated delay in help-seeking in a population sample of adults in the UK. *Br J Cancer.*  
37  
38 2014;110:12–8. doi:10.1038/bjc.2013.684.  
39
- 40 27. Al-Azri M, Al-Saidi M, AL-Mutair E, *et al.* Awareness of risk factors, symptoms and  
41 time to seek medical help of ovarian cancer amongst Omani women attending teaching  
42 hospital in Muscat Governorate, Oman. *Asian Pac J Cancer Prev.* 2018;19:1833–43.  
43  
44 doi:10.22034/APJCP.2018.19.7.1833.  
45  
46
- 47 28. Bish A, Ramirez A, Burgess C, *et al.* Understanding why women delay in seeking help  
48 for breast cancer symptoms. *J Psychosom Res.* 2005;58:321–6.  
49  
50 doi:10.1016/j.jpsychores.2004.10.007.  
51  
52
- 53 29. Ministry of Health, Oman. Ministry of Health Directorate General of Private Health  
54 Establishments referral policy. Available:  
55  
56 [https://www.moh.gov.om/documents/10181/667459/Refferal+Policy.pdf/2705a237-9a47-](https://www.moh.gov.om/documents/10181/667459/Refferal+Policy.pdf/2705a237-9a47-428d-91e3-5a1a08baaa07)  
57  
58 [428d-91e3-5a1a08baaa07](https://www.moh.gov.om/documents/10181/667459/Refferal+Policy.pdf/2705a237-9a47-428d-91e3-5a1a08baaa07) [Accessed July 2020].  
59  
60

- 1  
2  
3 30. Al-Azri MH, Al-Awisi H, Al-Rasbi S, *et al.* Coping with a diagnosis of breast cancer  
4 among Omani women. *J Health Psychol.* 2014;19:836–46.  
5  
6 doi:10.1177/1359105313479813.  
7  
8 31. Al-Azri M, Al-Awisi H, Al-Moundhri M. Coping with a diagnosis of breast cancer-  
9 literature review and implications for developing countries. *Breast J.* 2009;15:615–22.  
10  
11 doi:10.1111/j.1524-4741.2009.00812.x.  
12  
13 32. Al-Lawati T, Mehdi I, Al Bahrani B, *et al.* Does alternative and traditional wasam (local  
14 cauterium) therapy facilitate an early and more extensive locoregional metastasis of breast  
15 cancer? *Gulf J Oncolog.* 2016;1:37–42.  
16  
17 33. Andersen RS, Vedsted P, Olesen F, *et al.* Patient delay in cancer studies: a discussion of  
18 methods and measures. *BMC Health Serv Res.* 2009;9:189. doi:10.1186/1472-6963-9-  
19 189.  
20  
21  
22  
23  
24  
25  
26  
27  
28  
29  
30  
31  
32  
33  
34  
35  
36  
37  
38  
39  
40  
41  
42  
43  
44  
45  
46  
47  
48  
49  
50  
51  
52  
53  
54  
55  
56  
57  
58  
59  
60

**Table 1:** Sociodemographic and clinical characteristics as stated by the participants

| <b>Variables</b>                                         | <b>n (300)</b> | <b>%</b> |
|----------------------------------------------------------|----------------|----------|
| <b>Age (years) (n = 298)</b>                             |                |          |
| ≤ 40                                                     | 109            | 36.6     |
| 41–50                                                    | 88             | 29.5     |
| > 50                                                     | 101            | 33.9     |
| <b>Marital status (n = 298)</b>                          |                |          |
| Single                                                   | 21             | 7.0      |
| Married                                                  | 227            | 76.2     |
| Divorced                                                 | 11             | 3.7      |
| Widowed                                                  | 39             | 13.1     |
| <b>Origin (n = 297)</b>                                  |                |          |
| Muscat                                                   | 102            | 34.3     |
| Ad Dhahirah                                              | 33             | 11.1     |
| Al Batinah                                               | 60             | 20.2     |
| Ad Dakhiliyah                                            | 40             | 13.5     |
| Al Wusta                                                 | 1              | 0.3      |
| Ash Sharqiyah                                            | 41             | 13.8     |
| Dhofar                                                   | 5              | 1.7      |
| Musandam                                                 | 2              | 0.7      |
| Al Buraimi                                               | 13             | 4.4      |
| <b>Educational level (n = 298)</b>                       |                |          |
| No formal education                                      | 105            | 35.2     |
| Primary and elementary                                   | 37             | 12.4     |
| High school                                              | 93             | 31.2     |
| College and above                                        | 63             | 21.1     |
| <b>Employment status (n = 293)</b>                       |                |          |
| Employed                                                 | 97             | 33.1     |
| Unemployed/Housewife                                     | 196            | 66.9     |
| <b>Monthly family income in OMR (n = 281)</b>            |                |          |
| ≤ 500                                                    | 110            | 39.1     |
| 501–1,000                                                | 99             | 35.2     |
| > 1,000                                                  | 72             | 25.6     |
| <b>Family history of BC (n = 299)</b>                    |                |          |
| Yes                                                      | 81             | 27.1     |
| No                                                       | 218            | 72.9     |
| <b>If yes, degree of relationship (n = 80)</b>           |                |          |
| First-degree                                             | 29             | 36.3     |
| Second-degree                                            | 32             | 40.0     |
| Third-degree                                             | 19             | 23.8     |
| <b>Stage of BC at diagnosis (n = 299)</b>                |                |          |
| Stage I                                                  | 62             | 20.7     |
| Stage II                                                 | 81             | 27.1     |
| Stage III                                                | 55             | 18.4     |
| Stage IV                                                 | 45             | 15.1     |
| I don't know                                             | 56             | 18.7     |
| <b>Treatment modality at time of interview (n = 261)</b> |                |          |
| Radiotherapy                                             | 135            | 51.7     |
| Hormonal therapy                                         | 94             | 36.0     |
| Targeted biological therapy                              | 37             | 14.2     |
| Chemotherapy                                             | 202            | 77.4     |
| Surgery                                                  | 154            | 59.0     |
| I don't remember                                         | 33             | 12.6     |

BC: breast cancer; OMR: Omani riyal.

**Figure 1:** General knowledge of breast cancer and delays in diagnosis

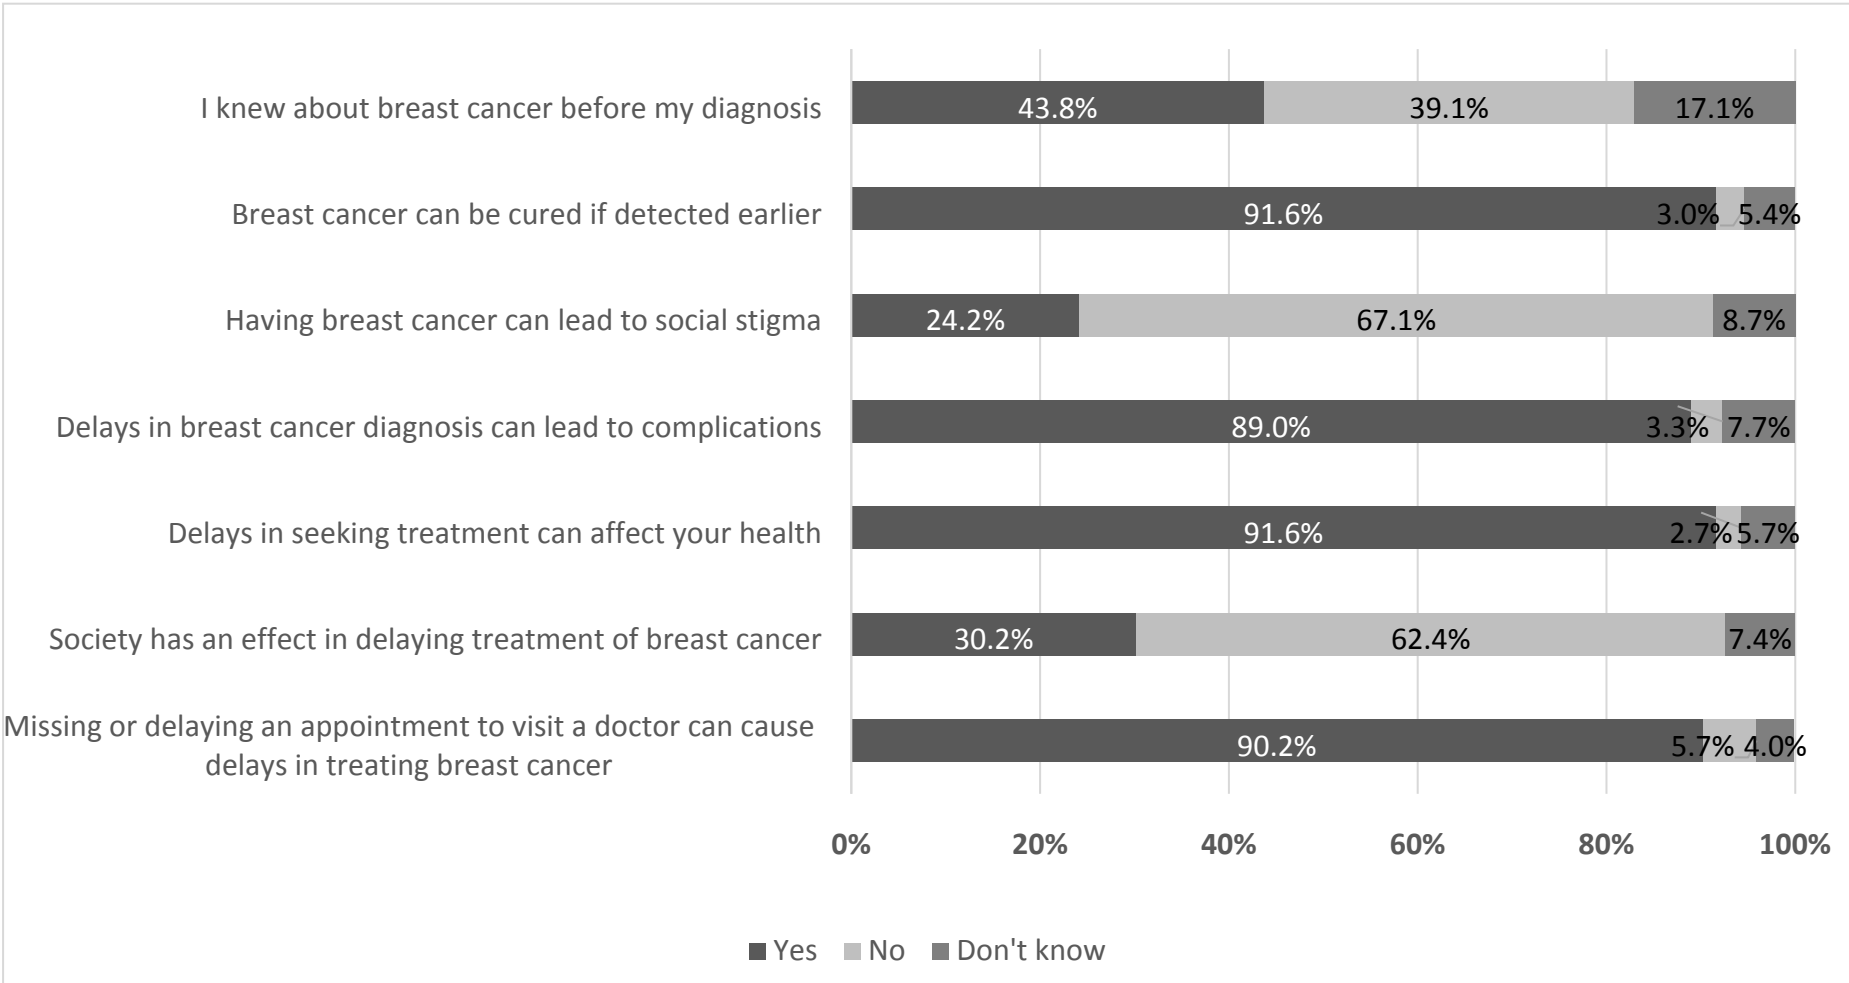

**Figure 2:** Knowledge of specific signs and symptoms of breast cancer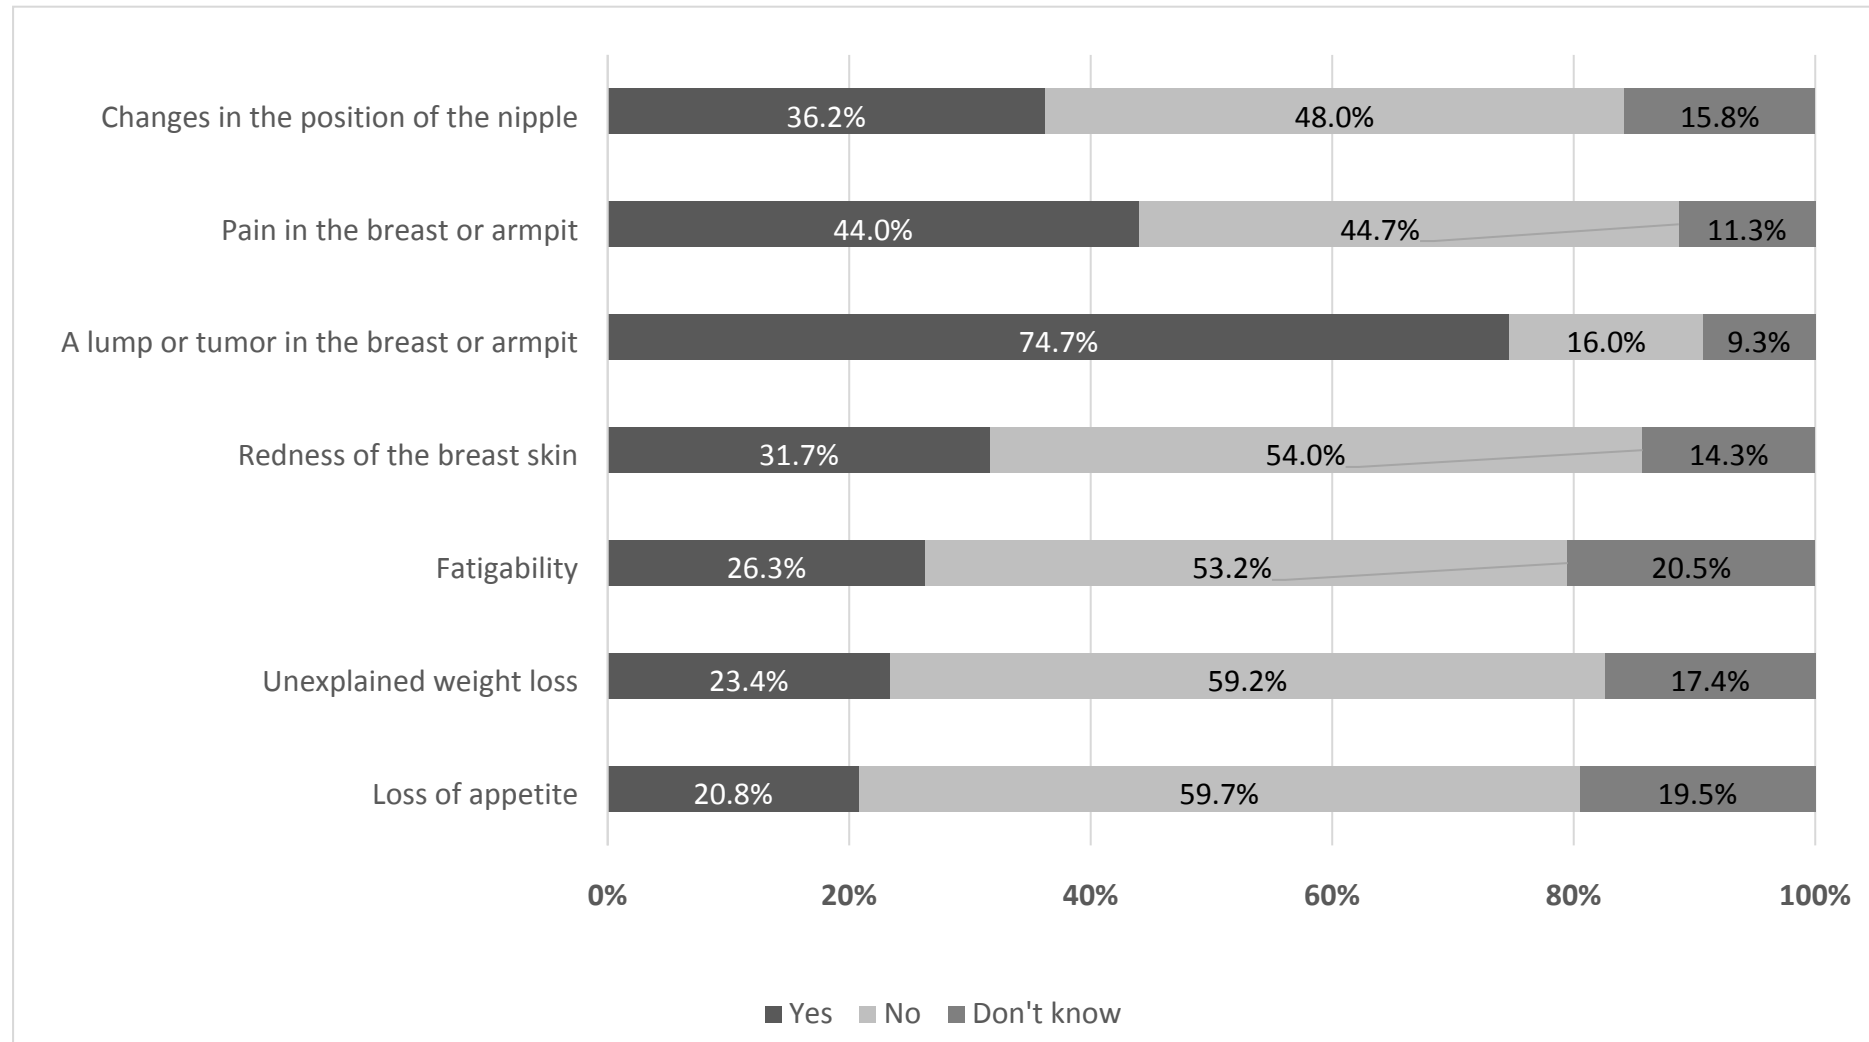

Figure 3: Barriers to medical help-seeking

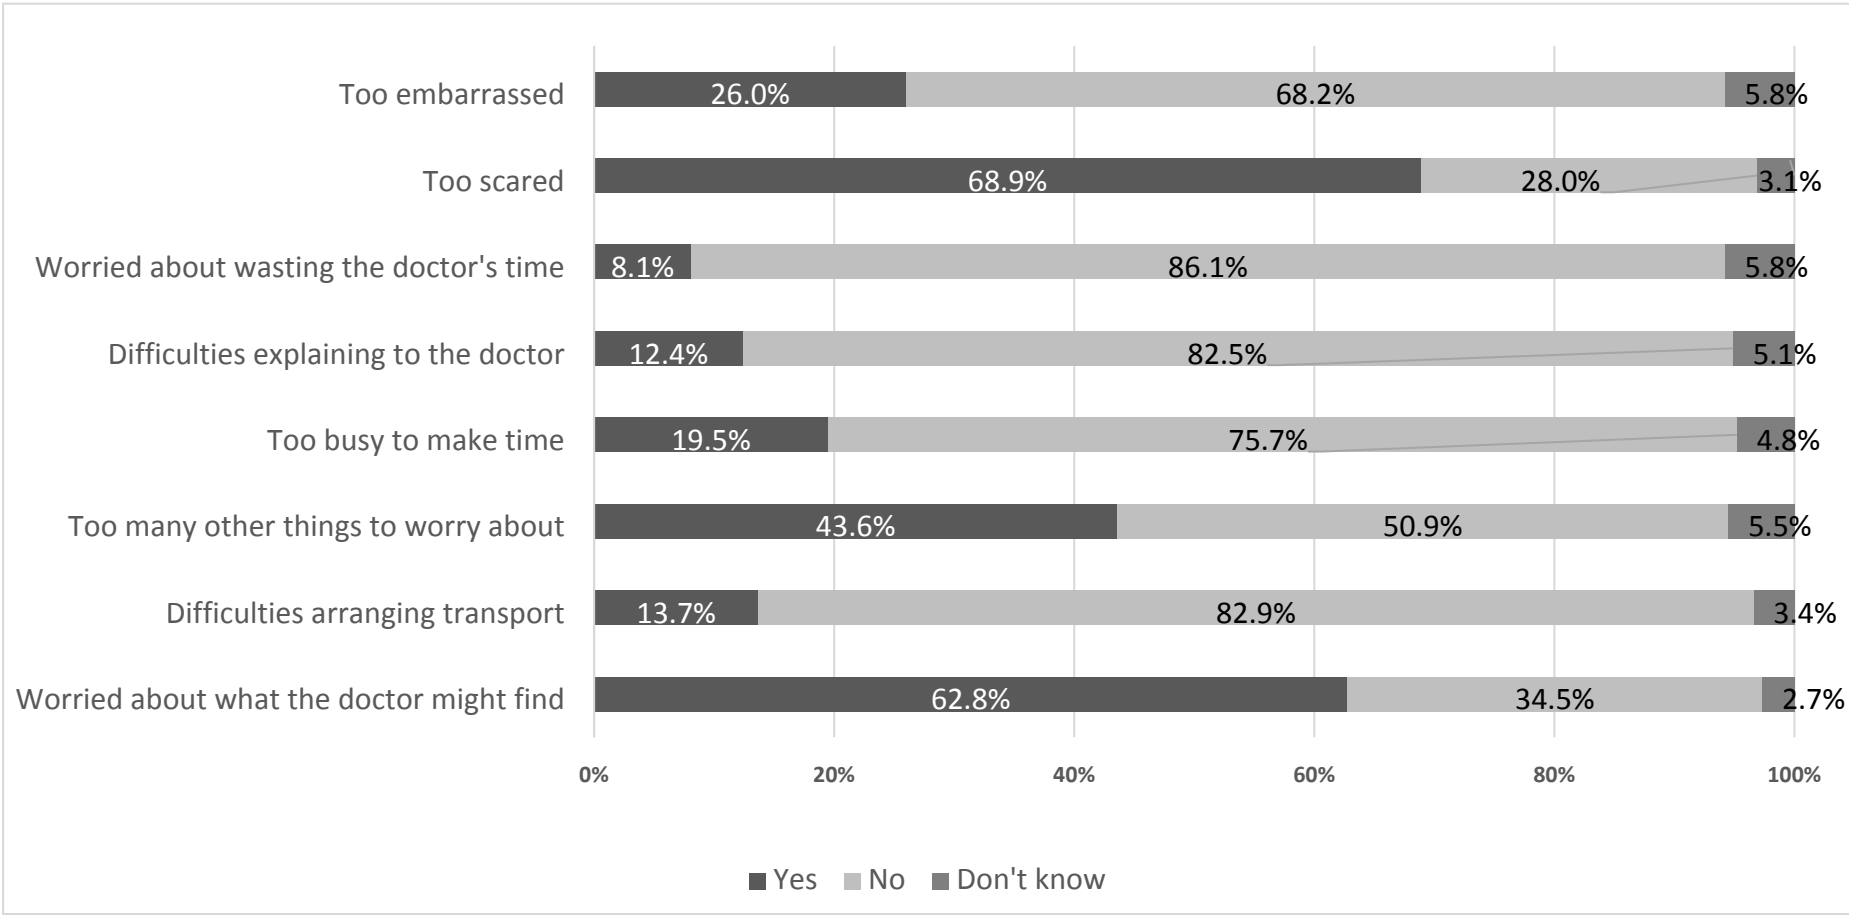

**Table 2:** Association between sociodemographic characteristics and knowledge of breast cancer symptoms

| Characteristics                     | Knowledge of BC symptoms, OR (95% CI) |                              |                                     |                            |                    |                         |                  |
|-------------------------------------|---------------------------------------|------------------------------|-------------------------------------|----------------------------|--------------------|-------------------------|------------------|
|                                     | Changes in the position of the nipple | Pain in the breast or armpit | Lump/tumour in the breast or armpit | Redness of the breast skin | Fatigability       | Unexplained weight loss | Loss of appetite |
| <b>Age (years)</b>                  |                                       |                              |                                     |                            |                    |                         |                  |
| ≤ 40                                | 0.71 (0.24–2.07)                      | 1.41 (0.42–0.47)             | 1.12 (0.31–4.0)                     | 0.95 (0.30–2.97)           | 0.69 (0.26–1.82)   | 1.04 (0.37–2.93)        | 0.62 (0.23–1.69) |
| 41–50                               | 0.99 (0.35–2.82)                      | 2.11 (0.61–7.34)             | 1.27 (0.37–4.40)                    | 0.74 (0.27–2.05)           | 0.82 (0.32–2.08)   | 1.11 (0.40–3.06)        | 0.81 (0.31–2.14) |
| > 50                                | 1.0                                   | 1.0                          | 1.0                                 | 1.0                        | 1.0                | 1.0                     | 1.0              |
| <b>Marital status</b>               |                                       |                              |                                     |                            |                    |                         |                  |
| Single                              | 0.68 (0.10–4.45)                      | 0.23 (0.03–1.75)             | 0.39 (0.05–2.88)                    | 2.53 (0.26–24.41)          | 0.37 (0.09–1.58)   | 0.52 (0.10–2.60)        | 0.82 (0.17–3.90) |
| Married                             | 0.605 (0.22–1.69)                     | 0.53 (0.16–1.78)             | 0.82 (0.24–2.82)                    | 1.65 (0.66–4.13)           | 0.97 (0.39–2.39)   | 0.89 (0.33–2.35)        | 1.22 (0.50–2.99) |
| Divorced/Widowed                    | 1.0                                   | 1.0                          | 1.0                                 | 1.0                        | 1.0                | 1.0                     | 1.0              |
| <b>Educational level</b>            |                                       |                              |                                     |                            |                    |                         |                  |
| No formal education                 | 0.16 (0.03–0.81)*                     | 0.10 (0.01–0.86)*            | 0.93 (0.14–6.36)                    | 2.97 (0.05–1.62)           | 1.13 (0.27–4.80)   | 0.29 (0.06–1.42)        | 0.37 (0.09–1.56) |
| Primary and elementary              | 0.49 (0.08–2.87)                      | 0.10 (0.01–0.84)*            | 0.73 (0.11–4.96)                    | 0.27 (0.05–1.47)           | 1.18 (0.27–5.08)   | 0.18 (0.04–0.88)*       | 0.29 (0.07–1.19) |
| High school                         | 0.97 (0.24–3.85)                      | 0.60 (0.09–4.10)             | 7.28 (1.06–50.19)*                  | 1.19 (0.28–5.18)           | 3.82 (1.08–13.58)* | 0.72 (0.19–2.68)        | 1.41 (0.44–4.53) |
| College and above                   | 1.0                                   | 1.0                          | 1.0                                 | 1.0                        | 1.0                | 1.0                     | 1.0              |
| <b>Employment status</b>            |                                       |                              |                                     |                            |                    |                         |                  |
| Employed                            | 0.83 (0.28–2.50)                      | 1.60(0.37–6.83)              | 1.78 (0.38–8.12)                    | 2.53 (0.74–8.59)           | 4.18 (1.34–13.05)* | 1.18 (0.41–3.43)        | 1.45 (0.54–3.95) |
| Unemployed/Housewife                | 1.0                                   | 1.0                          | 1.0                                 | 1.0                        | 1.0                | 1.0                     | 1.0              |
| <b>Monthly family income in OMR</b> |                                       |                              |                                     |                            |                    |                         |                  |
| ≤ 500                               | 1.22 (0.37–4.04)                      | 4.14 (1.14–15.12)*           | 1.54 (0.35–6.80)                    | 3.58 (1.11–11.52)*         | 1.49 (0.51–4.35)   | 1.89 (0.60–5.92)        | 2.66 (0.92–7.72) |
| 501–1,000                           | 0.98 (0.32–2.97)                      | 1.98 (0.58–6.76)             | 0.58 (0.16–2.09)                    | 3.33 (1.07–10.43)*         | 1.15 (0.43–3.06)   | 0.83 (0.30–2.29)        | 1.06 (0.42–2.65) |
| > 1,000                             | 1.0                                   | 1.0                          | 1.0                                 | 1.0                        | 1.0                | 1.0                     | 1.0              |
| <b>Family history of BC</b>         |                                       |                              |                                     |                            |                    |                         |                  |
| Yes                                 | 0.50 (0.20–1.23)                      | 0.48 (0.17–1.41)             | 0.42 (0.13–1.33)                    | 0.54 (0.22–1.32)           | 0.39 (0.17–0.91)   | 0.52 (0.22–1.24)        | 0.73 (0.34–1.56) |
| No                                  | 1.0                                   | 1.0                          | 1.0                                 | 1.0                        | 1.0                | 1.0                     | 1.0              |
| <b>Family history of any cancer</b> |                                       |                              |                                     |                            |                    |                         |                  |
| Yes                                 | 0.74 (0.31–1.75)                      | 0.73 (0.26–2.0)              | 0.93 (0.33–2.58)                    | 1.04 (0.45–2.38)           | 1.61 (0.80–3.26)   | 1.10 (0.50–2.43)        | 1.22 (0.59–2.51) |
| No                                  | 1.0                                   | 1.0                          | 1.0                                 | 1.0                        | 1.0                | 1.0                     | 1.0              |

BC: breast cancer; OR: odds ratio; CI: confidence interval; OMR: Omani riyal.

\*Significant at the  $p < 0.05$  level.



**Table 3:** Time taken for medical consultation, referral, and treatment of breast cancer as stated by the participants

| Variables                                                                                                       | n (300) | %    |
|-----------------------------------------------------------------------------------------------------------------|---------|------|
| <b>Overall length of time since diagnosis (months) (n = 297)</b>                                                |         |      |
| < 3                                                                                                             | 46      | 15.5 |
| 3–6                                                                                                             | 165     | 55.6 |
| 6–12                                                                                                            | 86      | 29.0 |
| <b>Initial response upon first noticing possible BC symptoms (n = 296)</b>                                      |         |      |
| Informing husband                                                                                               | 119     | 40.2 |
| Informing family members                                                                                        | 108     | 36.5 |
| Informing friends                                                                                               | 5       | 1.7  |
| Seeing a doctor in a local health center                                                                        | 24      | 8.1  |
| Seeing a doctor in a government hospital                                                                        | 25      | 8.4  |
| Seeing a doctor in a private sector facility                                                                    | 7       | 2.4  |
| Traveling abroad                                                                                                | 6       | 2.0  |
| Using traditional/herbal medicine                                                                               | 2       | 0.7  |
| <b>Approximate duration of symptom(s) before contacting a doctor (n = 298)</b>                                  |         |      |
| < 1 week                                                                                                        | 93      | 31.2 |
| 1–2 weeks                                                                                                       | 46      | 15.4 |
| 3–4 weeks                                                                                                       | 59      | 19.8 |
| 5–7 weeks                                                                                                       | 24      | 8.1  |
| 2–5 months                                                                                                      | 38      | 12.8 |
| 6–12 months                                                                                                     | 18      | 6.0  |
| > 12 months                                                                                                     | 20      | 6.7  |
| <b>Length of time between contacting a doctor and getting an appointment (n = 294)</b>                          |         |      |
| Same/next day                                                                                                   | 52      | 17.7 |
| < 1 week                                                                                                        | 78      | 26.5 |
| 1–2 weeks                                                                                                       | 61      | 20.7 |
| 3–4 weeks                                                                                                       | 54      | 18.4 |
| 1–2 months                                                                                                      | 35      | 11.9 |
| > 3 months                                                                                                      | 14      | 4.8  |
| <b>Number of medical visits before being diagnosed</b>                                                          |         |      |
| <b>At local health centres (n = 155)</b>                                                                        |         |      |
| 1                                                                                                               | 105     | 67.7 |
| 2                                                                                                               | 27      | 17.4 |
| 3                                                                                                               | 23      | 14.8 |
| <b>At government hospitals (n = 209)</b>                                                                        |         |      |
| 1                                                                                                               | 63      | 30.1 |
| 2                                                                                                               | 44      | 21.1 |
| 3                                                                                                               | 47      | 22.5 |
| ≥ 4                                                                                                             | 55      | 26.3 |
| <b>Length of time between being referred to hospital and getting an appointment with a specialist (n = 296)</b> |         |      |
| < 1 week                                                                                                        | 117     | 39.5 |
| 1–2 weeks                                                                                                       | 94      | 31.8 |
| 3–4 weeks                                                                                                       | 58      | 19.6 |
| 5–7 weeks                                                                                                       | 12      | 4.1  |
| 2–5 months                                                                                                      | 8       | 2.7  |
| 6–12 months                                                                                                     | 3       | 1.0  |
| > 12 months                                                                                                     | 4       | 1.4  |
| <b>Approximate length of time between first medical appointment and diagnosis (n = 297)</b>                     |         |      |
| Same/next day                                                                                                   | 31      | 10.4 |
| < 1 week                                                                                                        | 72      | 24.2 |
| 1–2 weeks                                                                                                       | 92      | 31.0 |
| 3–4 weeks                                                                                                       | 53      | 17.8 |

|                                                                                        |    |      |
|----------------------------------------------------------------------------------------|----|------|
| 1-2 months                                                                             | 30 | 10.1 |
| 3-6 months                                                                             | 10 | 3.4  |
| > 6 months                                                                             | 9  | 3.0  |
| <b><i>Length of time between diagnosis and first receiving treatment (n = 294)</i></b> |    |      |
| < 1 week                                                                               | 88 | 29.9 |
| 1-2 weeks                                                                              | 84 | 28.6 |
| 3-4 weeks                                                                              | 58 | 19.7 |
| 1-2 months                                                                             | 46 | 15.6 |
| > 3 months                                                                             | 18 | 6.1  |

BC: breast cancer.

For peer review only

# BMJ Open

## Knowledge of symptoms, time to presentation and barriers to medical help-seeking among Omani women diagnosed with breast cancer - A cross-sectional study

|                                 |                                                                                                                                                                                                                                                                                                                                                                                                                                                                                                                                                                                                                                                   |
|---------------------------------|---------------------------------------------------------------------------------------------------------------------------------------------------------------------------------------------------------------------------------------------------------------------------------------------------------------------------------------------------------------------------------------------------------------------------------------------------------------------------------------------------------------------------------------------------------------------------------------------------------------------------------------------------|
| Journal:                        | <i>BMJ Open</i>                                                                                                                                                                                                                                                                                                                                                                                                                                                                                                                                                                                                                                   |
| Manuscript ID                   | bmjopen-2020-043976.R1                                                                                                                                                                                                                                                                                                                                                                                                                                                                                                                                                                                                                            |
| Article Type:                   | Original research                                                                                                                                                                                                                                                                                                                                                                                                                                                                                                                                                                                                                                 |
| Date Submitted by the Author:   | 13-Nov-2020                                                                                                                                                                                                                                                                                                                                                                                                                                                                                                                                                                                                                                       |
| Complete List of Authors:       | Al-Azri, Mohammed; Sultan Qaboos University, Family Medicine and Public Health;<br>Al-Baimani, Khalid ; Sultan Qaboos University, Oncology Unit, Department of Medicine<br>Al-Awaisi, Huda ; Sultan Qaboos University, Nursing Directorate, Sultan Qaboos University Hospital<br>Al-Mandhari, Zahid ; The Royal Hospital<br>Al-Khamayasi, Jasem ; Sultan Qaboos University, College of Medicine and Health Sciences<br>Al-Lawati, Yaseen ; Sultan Qaboos University, College of Medicine and Health Sciences<br>Panchatcharam, Sathiya Murthi ; Oman Medical Speciality Board, Research Section, Medical Simulation and Skills Development Centre |
| <b>Primary Subject Heading</b>: | Oncology                                                                                                                                                                                                                                                                                                                                                                                                                                                                                                                                                                                                                                          |
| Secondary Subject Heading:      | Health services research                                                                                                                                                                                                                                                                                                                                                                                                                                                                                                                                                                                                                          |
| Keywords:                       | PREVENTIVE MEDICINE, Adult oncology < ONCOLOGY, Breast tumours < ONCOLOGY                                                                                                                                                                                                                                                                                                                                                                                                                                                                                                                                                                         |
|                                 |                                                                                                                                                                                                                                                                                                                                                                                                                                                                                                                                                                                                                                                   |

SCHOLARONE™  
Manuscripts



I, the Submitting Author has the right to grant and does grant on behalf of all authors of the Work (as defined in the below author licence), an exclusive licence and/or a non-exclusive licence for contributions from authors who are: i) UK Crown employees; ii) where BMJ has agreed a CC-BY licence shall apply, and/or iii) in accordance with the terms applicable for US Federal Government officers or employees acting as part of their official duties; on a worldwide, perpetual, irrevocable, royalty-free basis to BMJ Publishing Group Ltd ("BMJ") its licensees and where the relevant Journal is co-owned by BMJ to the co-owners of the Journal, to publish the Work in this journal and any other BMJ products and to exploit all rights, as set out in our [licence](#).

The Submitting Author accepts and understands that any supply made under these terms is made by BMJ to the Submitting Author unless you are acting as an employee on behalf of your employer or a postgraduate student of an affiliated institution which is paying any applicable article publishing charge ("APC") for Open Access articles. Where the Submitting Author wishes to make the Work available on an Open Access basis (and intends to pay the relevant APC), the terms of reuse of such Open Access shall be governed by a Creative Commons licence – details of these licences and which [Creative Commons](#) licence will apply to this Work are set out in our licence referred to above.

Other than as permitted in any relevant BMJ Author's Self Archiving Policies, I confirm this Work has not been accepted for publication elsewhere, is not being considered for publication elsewhere and does not duplicate material already published. I confirm all authors consent to publication of this Work and authorise the granting of this licence.

1  
2  
3 **Knowledge of symptoms, time to presentation and barriers to medical help-**  
4 **seeking among Omani women diagnosed with breast cancer - A cross-**  
5 **sectional study**  
6  
7  
8  
9

10  
11 Mohammed Al-Azri<sup>1\*</sup>, Khalid Al-Baimani<sup>2</sup>, Huda Al-Awaisi<sup>3</sup>, Zahid Al-Mandhari<sup>4</sup>, Jasem Al-  
12 Khamayasi<sup>5</sup>, Yaseen Al-Lawati<sup>5</sup>, Sathiya Murthi Panchatcharam<sup>6</sup>  
13  
14

15  
16 Correspondence to Dr Mohammed Al-Azri; mhalazri@squ.edu.om  
17  
18  
19  
20  
21  
22  
23  
24  
25  
26  
27  
28  
29  
30  
31  
32  
33  
34  
35  
36  
37  
38  
39  
40  
41  
42  
43  
44  
45  
46  
47  
48  
49  
50  
51  
52  
53  
54  
55  
56  
57  
58  
59  
60

For peer review only

## ABSTRACT

**Objectives** To identify knowledge of breast cancer (BC) symptoms, time taken to consult a doctor and factors contributing to delays in medical help-seeking.

**Design** A cross-sectional study of Omani women diagnosed with BC.

**Setting** The two main teaching hospitals in Oman, Royal Hospital and Sultan Qaboos University Hospital.

**Participants** Adult Omani women recently diagnosed with BC.

**Tools** The Breast Cancer Awareness Measure and International Cancer Benchmarking Partnership questionnaire were used to collect data.

**Results** A total of 300 women with BC participated (response rate: 91.0%). The mean age at diagnosis was  $43.0 \pm 12.50$  years and 33.5% were diagnosed at stages III or IV. Although most women (74.4%) recognised breast/armpit lumps to be a symptom of BC, less than half identified other symptoms, including breast/armpit pain (44.0%), changes in the position of the nipple (36.2%), redness (31.7%), fatigue (26.3%), weight loss (23.4%) and loss of appetite (20.8%). While most (91.6%) were aware that BC could be cured if detected early, only 66.4% sought medical help within a month of developing symptoms. Initial responses to symptoms included informing husbands (40.2%) or family members (36.5%). Barriers to seeking medical help included feeling scared (68.9%) and worried about what the doctor might find (62.8%). Highly educated women were more likely to recognise the following as BC symptoms: changes in nipple position (odds ratio (OR): 0.16, 95% confidence interval (CI): 0.03–0.81), breast pain (OR: 0.10, 95% CI 0.01–0.86) and unexplained weight loss (OR: 0.18, 95% CI: 0.04–0.88) (all  $p < 0.05$ ).

**Conclusions** Although many Omani women with BC were aware of the importance of early diagnosis, most demonstrated inadequate knowledge of symptoms, did not prioritise seeking medical help and reported emotional barriers to help-seeking. More educational measures are needed to improve symptom recognition and address help-seeking barriers to minimise delays in diagnosis.

### Strengths and limitations of this study

- This is the first study conducted in Oman to explore time taken to seek medical help and barriers to seeking medical help among women diagnosed with breast cancer (BC).
- Although women were aware of the importance of early BC detection and that delays in seeking medical help could lead to complications, most presented at relatively advanced stages, with the cause for delay usually being due to the patients themselves.
- The initial response upon first noticing possible BC symptoms was to inform husbands and family members rather than seeking medical help.
- The possibility of recall and response bias could not be ruled out due to the use of self-reported questionnaire measures for data collection.
- While the Arabic version of the final questionnaire was assessed for reliability, the validity of this measure was not determined.

## BACKGROUND

Worldwide, breast cancer (BC) accounts for 10% of all cancers diagnosed annually and approximately 15% of all cancer deaths among women.[1] Despite efforts to improve the early detection of BC, nearly one-third of women worldwide have either regional or distant metastasis at the time of diagnosis.[2] In the Gulf Cooperation Council (GCC) region, BC is the most commonly diagnosed cancer among women, accounting for 13–35% of all cancers; moreover, approximately half of BC patients are under 50 years of age at the time of diagnosis, with a median age of 49–52 years compared to 63 years in Western countries.[3] In addition, approximately 58.0% of women in GCC countries present with advanced stages of BC at diagnosis (45% with regional metastasis and 12.8% with distant metastasis).[4]

Nonetheless, there is a high chance of a cure if BC is detected early and adequately treated; for example, women who begin treatment within 3–5 months of developing symptoms have significantly worse survival rates compared to those who seek medical help in <3 months.[5, 6] Delays in cancer diagnosis are defined as the time interval between the first symptom and the start of treatment.[7] The most common causes of delay are usually because patients do not correctly identify cancer symptoms or act on them to seek medical help.[8, 9] Low awareness of BC symptoms, lack of access to care, unavailability or non-participation in BC screening, fatalism, negative perceptions of BC and cultural beliefs are all factors which contribute to delays in seeking medical help on the part of patients.[2, 8, 10-12]

In Oman, BC is the most commonly diagnosed cancer and accounts for 12.79% of all cancers and 21.2% of cancers affecting women.[13] Recently, the incidence of BC has almost doubled from 13.6 cases per 100,000 women in 1996 to 26.9 in 2015.[13] Like other GCC countries, the majority of women diagnosed with BC in Oman are younger (median age: 49 years) and present at advanced stages (i.e. stages III and IV), with a low five-year survival rate (63%).[14] Several factors contribute to delays in cancer diagnosis in Oman, including the lack of a national screening programme, social stigma, the influence of family, spouses and friends in treatment decision-making and the prevalence of traditional medicine and medical tourism.[8, 15-17] Identifying specific factors which contribute to delays in BC diagnosis are crucial to help improve patient outcomes. The aim of this study was therefore to identify knowledge of BC symptoms, time taken to seek medical help and barriers to medical help-seeking among Omani women diagnosed with BC.



## Methods

### Study setting

This cross-sectional study was carried out between November 2018 and April 2019 at the National Oncology Centre of the Royal Hospital (RH) and the Oncology Unit of the Sultan Qaboos University Hospital (SQUH), both of which are located in Muscat, the capital city of Oman. These hospitals represent the two primary oncology centres in Oman and provide comprehensive treatment (including surgery, chemotherapy and radiotherapy) and palliative care to patients diagnosed with all types of cancer, including BC.[18] The majority of patients diagnosed with BC at other regional hospitals of Oman are referred to either RH or SQUH for treatment.

### Sample size estimation and recruitment

According to previous data from the National Cancer Registry from 1999 to 2015, the number of BC patients in 2018 and 2019 was estimated to be 271 based on a linear prediction model.[13] Thus, Omani women diagnosed with BC at the RH or SQUH during the year prior to data collection were targeted for inclusion in the current study, as having been diagnosed more than a year previously could have resulted in recall bias.

A total of 330 adult Omani women aged  $\geq 18$  years and diagnosed with BC within the preceding year at RH or SQUH were identified from the electronic hospital systems and invited to participate in the study. The names of the patients and the date of their next visit to outpatient oncology clinics and day care units or admission to wards was identified. Two different researchers over a period of six months were involved in the data collection process in order to increase the number of participants in the study. Also, women who did not respond were contacted again and the date of their next appointment recorded.

Patients were informed that participation in the study was optional and would not affect the medical care they received. Only women who agreed to participate were included in the study. Women who were in obvious distress or pain and those who were admitted because of complications such as febrile neutropenia were excluded. All participants signed a consent form prior to taking part in the study.

### **Tool used to measure BC symptom knowledge and barriers to seeking medical help**

The Breast Module of the Cancer Awareness Measure (Breast-CAM) was developed by Cancer Research UK, King's College London and University College London and is a valid and reliable instrument for measuring BC awareness in women.[19, 20] It has moderate to good test-retest reliability for most items, with a good discriminatory index of BC knowledge and can be administered either face-to-face or via telephone interviews.[19, 20] The Breast-CAM were intended to be delivered to women in the community and includes different sections which independently measure and assess the following: knowledge of BC symptoms (i.e. changes in the nipple, pain or lumps in the breast or armpit, redness, fatigue, unexplained weight loss and loss of appetite) and barriers to seeking medical help, including emotional (i.e. being too embarrassed, scared or worried about what the doctor might find), practical (i.e. being too busy to make time, having too many other things to worry about and anticipating difficulties explaining concerns to the doctor) and service-related barriers (i.e. difficulties arranging transport or being worried about wasting the doctor's time).[19]

### **Tool used to measure time taken to seek medical help**

The International Cancer Benchmarking Partnership (ICBP) was developed by the Department of Health in the UK to study international variations in cancer survival; the module seeks to measure the overall time interval between the first possible symptom of cancer and the start of treatment.[7] This overall interval is then divided into subintervals depending on the factor responsible for the delay, including delays related to the patient's attitudes and help-seeking behaviours (i.e. their initial response upon first noticing symptoms and the duration of symptoms before contacting the doctor), the diagnostic process (i.e. time elapsed to secure an appointment to see the doctor, number of medical visits before receiving a diagnosis and time elapsed between being referred to hospital and getting an appointment with a specialist) and the treatment or management process (i.e. time elapsed between first medical appointment and diagnosis and between diagnosis and first receiving treatment).[7] The ICBP questionnaire has been used in several international studies to investigate root causes of delays in cancer diagnoses.[21, 22]

For the purposes of the current study, the Breast-CAM and ICBP tools were combined into one questionnaire in order to assess knowledge of BC symptoms, time taken to consult a doctor and barriers to seeking medical help among Omani women. Sociodemographic variables in the modules were modified to be relevant to Omani society and the national healthcare system.

Both the Breast-CAM and ICBP tools were translated from English to Arabic and then back-translated into English.

The combined questionnaire was completed by two researchers during face-to-face interviews conducted with the participants. In order to ensure the clarity and reliability of the questionnaire, a pilot study was conducted of the first 30 women enrolled in the study. Based on a standardised item analysis, Cronbach's alpha ( $\alpha$ ) values of the Arabic versions of the Breast-CAM tool and ICBP questionnaire were 0.88 and 0.85, respectively.

### Statistical analysis

Data were analysed using SPSS software, version 22 (IBM Corp., Armonk, New York). Descriptive data were presented as numbers and percentages. A Chi-squared ( $\chi^2$ ) test was used to determine associations between sociodemographic characteristics and the responses of the participants. A binary logistic regression model was used to adjust for the effect of certain factors, with the findings presented as odds ratios (ORs) and 95% confidence intervals (CIs). A p value of  $<0.05$  was considered significant.

## Results

### Characteristics of the participants

A total of 300 women with BC participated in the study out of 333 eligible subjects, resulting in a response rate of 91.0%. The mean age was  $47.0 \pm 12.2$  years (median: 45.0 years, range: 24–84 years). The majority were below the age of 50 years (66.1%) and married (76.2%). Over one-third were residents of Muscat (34.3%) and had no formal education (35.2%). Overall, 81 patients (27.1%) reported having a family history of BC, of which the majority (76.3%) were first- or second-degree relatives. The mean age at BC diagnosis was  $43.0 \pm 12.50$  years.

At the time of the interviews, the length of the time since diagnosis was less than three months in 15.5% of women. Moreover, 33.5% of women had been diagnosed at late stages (i.e. stages III and IV). The women were receiving various treatments modalities at the time of the interviews, including chemotherapy, radiotherapy and hormonal therapy (table 1).

### Knowledge of BC symptoms and barriers to seeking medical help

The majority of women were aware that BC could be cured if detected sufficiently early (91.6%) and that delays in seeking medical treatment could adversely affect their health

(91.6%). Moreover, the majority were aware that missing or delaying an appointment to visit the doctor could cause delays in treatment (90.2%) and that delays in diagnosis could lead to complications (89.0%). On the other hand, less than half of the women (43.8%) had been aware of BC prior to their diagnosis. Under one-third of the cohort thought that a BC diagnosis could lead to social stigma (24.2%) and that society had an effect in delaying BC treatment (30.2%) (figure 1).

The majority of women (74.7%) were aware that lumps in the breast or armpit could be symptoms of BC. However, less than half were aware that pain in the breast or armpit (44.0%), changes in the position of the nipple (36.2%), redness of the skin of the breast (31.7%), fatigue (26.3%), unexplained weight loss (23.4%) and loss of appetite (20.8%) were possible BC symptoms (figure 2). The most commonly reported barriers to seeking medical help were fear (68.9%), followed by anxiety over what the doctor might find (62.8%), having too many other things to worry about (43.6%), embarrassment (26.0%), being too busy to make time to go to the doctor (19.5%), difficulties arranging transport (13.7%), difficulties explaining their symptoms to the doctor (12.4%) and worry over wasting the doctor's time (8.1%) (figure 3).

### **Associations between sociodemographic characteristics and responses**

The binary logistic regression analysis indicated that women who had no formal education were less likely than those who were highly educated (i.e. college and above) to recognise that the following were potential symptoms of BC: changes in the position of the nipple (OR 0.16 (95% CI 0.03–0.81)  $p < 0.05$ ), pain in the breast or armpit (OR 0.10 (95% CI 0.01–0.86)  $p < 0.05$ ) and unexplained weight loss (OR 0.18 (95% CI 0.04–0.88)  $p < 0.05$ ). On the other hand, women educated to the high school level were more likely than college-educated women to recognise that a lump in the breast or armpit (OR 7.28 (95% CI 1.06–50.19)  $p < 0.05$ ) and fatigue (OR 3.82 (95% CI 1.08–13.58)  $p < 0.05$ ) could be BC symptoms.

Employed women were more likely than unemployed women to recognise that fatigue could be a symptom of BC (OR 4.18 (95% CI 1.34–13.05)  $p < 0.05$ ). In addition, women in the lowest income category were more likely than those in the highest category to recognise that pain in the breast or armpit (OR 4.14 (95% CI 1.14–15.12)  $p < 0.05$ ) and redness (OR 3.58 (95% CI 1.11–11.52)  $p < 0.05$ ) could be BC symptoms (table 2).

### Time taken to seek medical help

The initial response of most women upon first noticing possible BC symptoms was to inform their husband (40.2%), followed by informing other family members (36.5%) and seeing a doctor at a government hospital (8.4%), local health centre (LHC) (8.1%) or private facility (2.4%); however, several women reported traveling abroad (2.0%), informing friends (1.7%) or using traditional or herbal remedies (0.7%).

Of all respondents, less than half (31.2%) decided to see a doctor within the first week of developing possible BC symptoms and 17.7% were able to get an appointment to see a doctor on the same day or the next day following their decision to seek medical help.

The majority of women were diagnosed with BC after their first visit to an LHC (67.7%) or to government hospitals (30.1%). Moreover, many women were able to see specialists at government hospitals within less than one week of referral (39.5%) and received confirmation of the diagnosis on the same day or the next day following their first appointment (10.4%). Finally, many women (29.9%) were able to receive their first treatment within the first week of their diagnosis (table 3).

### Discussion

To our knowledge, this is the first study conducted in Oman to explore knowledge of BC symptoms, time taken to seek medical help and barriers to seeking medical help among women with BC. The mean age of the women diagnosed with BC in this study was 43 years; this is much lower than the average age reported in developed countries (mean age: 63 years) and slightly below that reported in other Arab countries (mean age: 49–52 years).[3] A previous study conducted in Oman shared similar findings in which the mean age of women diagnosed with BC was 47 years, with one-third being under 40 years.[14] The younger age of presentation of women with BC in Oman might be attributable to various factors, including genetic background, the adoption of more ‘Westernised’ lifestyles (including reduced levels of physical activity and higher rates of obesity), a decrease in breastfeeding and the presence of potential carcinogens in the local environment.[23]

Although the vast majority of women in this study were aware of the importance of early BC detection and that delays in seeking medical help could lead to complications, many nevertheless presented at relatively advanced stages (i.e. stages III or IV). Previous studies

1  
2  
3 have reported similar findings.[14, 24] Although a large proportion of women in this study  
4 were able to recognise that lumps in the breast or armpit were a possible symptom of BC, the  
5 majority were not aware of other symptoms such as fatigue, unexplained weight loss or loss of  
6 appetite. Indeed, less than half of the women reported having been aware of or knowledgeable  
7 regarding BC prior to their own diagnosis. Researchers have recommended incorporating  
8 information regarding cancer risk factors and symptoms into the school curriculum so as to  
9 increase cancer knowledge in adulthood.[25]  
10  
11  
12  
13  
14  
15  
16

17 Poor awareness of BC symptoms is a predominant reason for delayed presentation to a  
18 doctor, particularly if symptoms are atypical in nature.[9] Most women with BC more  
19 commonly recognise obvious symptoms, such as lumps, compared to more ambiguous  
20 symptoms, such as tiredness, unexplained weight loss and reduced appetite; in fact, delays in  
21 presentation are more likely to occur in BC cases in which the symptoms do not include a breast  
22 lump.[6, 11] Furthermore, knowledge of BC symptoms is a prerequisite for prompt help-  
23 seeking behaviours, particularly if the symptom is perceived to be serious.[26] Uneducated  
24 women in our study were less likely to recognise certain BC symptoms, such as changes in the  
25 position of the nipple, breast or armpit pain and unexplained weight loss. Similar findings have  
26 also been noted among Omani women with ovarian cancer, with more educated women being  
27 more likely to recognise specific symptoms compared to those who were less educated.[27]  
28  
29  
30  
31  
32  
33  
34  
35  
36  
37

38 More than half of women in our study who sought medical help at LHCs or government  
39 hospitals were diagnosed with BC after their first or second visit, indicating that the cause for  
40 any delays in diagnosis was likely due to the patients themselves. Other researchers have  
41 highlighted that not seeking early medical help is a predictor of delayed diagnosis.[8, 28]  
42 Furthermore, the majority of women who were seen at LHCs in the present study were  
43 subsequently seen by specialists within two weeks of referral, with the BC diagnosis confirmed  
44 within another two weeks. Once again, this indicates that factors related to the local health  
45 system do not seem to play a major role in delaying BC diagnoses in Oman. Referral policies  
46 covering specific aspects of patient care are well established to oversee the transfer of patients  
47 from one healthcare setting to another for management.[29] Nonetheless, cancer patients in  
48 Oman, much like those in neighbouring GCC countries, often choose to seek medical help  
49 abroad (i.e. in countries like Thailand or India); this trend often causes delays in diagnosis,  
50 with many patients returning home with additional complications.[15]  
51  
52  
53  
54  
55  
56  
57  
58  
59  
60



1  
2  
3 For the majority of women in the current study, their initial response upon first noticing  
4 possible BC symptoms was to inform their husbands and family members. Becoming aware of  
5 possible symptoms of a life-threatening disease is often associated with feelings of emotional  
6 distress, anxiety and depression; hence, sharing this information with close family members  
7 might offer some emotional relief and support.[30, 31] Indeed, most women in our study  
8 prioritised sharing their symptoms with husbands or family members over consulting a doctor.  
9 This finding might be related to prevailing sociocultural attitudes which are based on a strong  
10 sense of moral responsibility and familial obligation, particularly when it comes to illness.[17]  
11 Furthermore, Omani women diagnosed with BC often rely on their families for emotional,  
12 physical and financial support, which also plays a role in treatment decision-making.[16, 17]  
13 However, the involvement of family members in medical decisions and treatment options can  
14 sometimes delay diagnoses, particularly if these individuals encourage patients to seek medical  
15 treatment abroad or pursue alternative or traditional remedies.[8, 32]  
16  
17  
18  
19  
20  
21  
22  
23  
24  
25  
26

27 Although more than half of the women in our study sought medical help within one  
28 month of developing BC symptoms, many nevertheless presented at an advanced stage by the  
29 time they were diagnosed. Various psychosocial and cultural beliefs have been attributed to the  
30 delayed presentation of BC cases.[15, 28, 30] A previous study from Oman showed that women  
31 with BC experienced severe psychosocial distress, including fear of death, social isolation,  
32 anxiety regarding the side-effects of treatment and fear that the cancer might spread or interfere  
33 with their daily lives.[15] Women who express explicit fears about the consequences of  
34 diagnosis and treatment are more reluctant to seek medical help, resulting in a higher chance  
35 of delays in diagnosis.[11]  
36  
37  
38  
39  
40  
41  
42  
43  
44

45 Similarly, many women in our study reported emotional barriers that might contribute to  
46 delays in consulting a doctor, such being scared, embarrassed or worried about what the doctor  
47 might find. Symptom appraisal and perception of their severity is a predictor of decisions to  
48 seek medical help.[28] Indeed, it is difficult to assess delays in BC presentation, diagnosis and  
49 treatment objectively due to variations in how people perceive symptoms and define time  
50 intervals.[33] Although there is growing interest in measuring cancer diagnostic time intervals  
51 and examining their effect on outcomes, the pathway from symptoms to diagnosis is  
52 complex.[34] The Model of Pathways to Treatment framework identified that the process of  
53 general healthcare-seeking is influenced by a mixture of physical, social and psychological  
54 factors. In this model, key time points along the diagnostic pathway include the detection of  
55  
56  
57  
58  
59  
60

1  
2  
3 bodily changes, the development of perceived reasons to consult with a doctor, the decision  
4 and action of consulting the doctor and, finally, the diagnosis and start of the treatment.[34]  
5  
6  
7

8 The decision to consult a doctor and seek medical help often relies on a patient's  
9 subjective definition of the 'main' symptoms of cancer, which in itself is often influenced by  
10 their pre-existing knowledge and perceptions of symptom severity.[35] The presence of  
11 chronic diseases or psychological symptoms may also further influence interpretation of these  
12 symptoms.[34] Furthermore, international variations in the investigation and referral of cancer  
13 patients to secondary care for suspected cancer symptoms can play a critical role in diagnostic  
14 delays and cancer outcomes; for instance, countries in which healthcare professionals  
15 demonstrate a greater readiness to refer or investigate patients with possible cancer symptoms  
16 have demonstrated high rates of cancer survival.[36]  
17  
18  
19  
20  
21  
22  
23  
24  
25

26 This study has certain limitations. First, many patients in Oman often choose to access  
27 healthcare in non-integrated settings; for instance, by attending a mixture of government  
28 facilities, private facilities and facilities abroad. Thus, it was difficult in some cases to track the  
29 time taken throughout the diagnostic pathway using the three usual component intervals of  
30 delay (i.e. patient, primary care and secondary care delays). Apart from self-reported  
31 information from the patients, there were no other methods available to measure delays in the  
32 absence of electronic or written tracking data.  
33  
34  
35  
36  
37  
38  
39

40 Second, while we recruited Omani women diagnosed with BC within the previous year to  
41 satisfy the sample size requirements, the possibility of recall bias cannot be ruled out. Third,  
42 although the Arabic version of the combined questionnaire (which incorporated both the  
43 Breast-CAM and ICBP tools) was tested for reliability and demonstrated a satisfactory  
44 Cronbach's alpha ( $\alpha$ ) coefficient, we could not guarantee its validity, which was beyond the  
45 scope of this research. Finally, we used the Breast-CAM section to measure knowledge of BC  
46 symptoms and barriers to seeking medical help among patients who had already been  
47 diagnosed with BC; as this tool was originally designed to be delivered to a community sample,  
48 we could not rule out potential bias in that the participants might have more knowledge of BC  
49 symptoms compared to other Omani women.  
50  
51  
52  
53  
54  
55  
56  
57  
58  
59  
60



## Conclusion

Omani women with BC demonstrated low levels of knowledge of BC symptoms and experienced several emotional barriers to seeking medical help; moreover, the majority were diagnosed at advanced stages. Despite national efforts to increase BC awareness, further educational initiatives are needed. Healthcare professionals should visit schools to raise awareness of BC symptoms and promote early help-seeking behaviours among female students in different regions of Oman. Employing both social and traditional media campaigns in LHCs and hospitals might also help to increase BC knowledge. Finally, healthcare professionals should make more efforts to build a trusting and cooperative relationship with female patients in order to help address emotional barriers to medical help-seeking, thereby encouraging them to disclose potential symptoms and thus reducing delays in diagnosis.

## Author affiliations

<sup>1</sup>Department of Family Medicine and Public Health, College of Medicine and Health Sciences, Sultan Qaboos University, Muscat, Oman.

<sup>2</sup>Oncology Unit, Department of Medicine, Sultan Qaboos University Hospital, Muscat, Oman.

<sup>3</sup>Nursing Directorate, Sultan Qaboos University Hospital, Muscat, Oman.

<sup>4</sup>National Oncology Centre, Radiotherapy Department, Royal Hospital, Muscat, Oman.

<sup>5</sup>College of Medicine and Health Sciences, Sultan Qaboos University, Muscat, Oman.

<sup>6</sup>Research Section, Medical Simulation and Skills Development Centre, Oman Medical Specialty Board, Muscat, Oman.

## Acknowledgements

The authors are grateful to the participating patients and to the authorities at RH and SQUH for allowing this study to take place. They are also grateful to the College of Medicine and Health Sciences at Sultan Qaboos University for funding the study.

## Contributors

MA, KA, HA, ZM, JA and YA conceived of the study and contributed to its design and implementation. JA and YA collected data. SMP performed the statistical analysis. MA drafted the manuscript. All authors read and approved the final version of the manuscript.

## Funding

This study was funded by an internal grant from the College of Medicine and Health Sciences, Sultan Qaboos University (#IG/MED/FMCO/19/01).

## Patient and public involvement

Patients and/or the public were not involved in the design, conduct, reporting or dissemination of this research.

## Patient consent for publication

Not applicable as no details regarding individual patients have been reported in the manuscript.

## Ethical approval

The study received ethical approval from the Medical Research and Ethics Committee of the College of Medicine and Health Sciences, Sultan Qaboos University (MREC #1809) as well as the Scientific Research Committee of the Royal Hospital (SRC #87/2018). Informed consent was obtained from all participants prior to their inclusion in the study.

## Data availability statement

The datasets used and/or analysed during this study are available from the corresponding author upon reasonable request.

## Competing interests

The authors declare that they have no competing interests.

## References

1. World Health Organization. Cancer: Breast cancer. Available: <https://www.who.int/cancer/prevention/diagnosis-screening/breast-cancer/en/> [Accessed July 2020].
2. Facione NC, Miaskowski C, Dodd MJ, *et al*. The self-reported likelihood of patient delay in breast cancer: new thoughts for early detection. *Prev Med* 2002;34:397–407. doi:10.1006/pmed.2001.0998.
3. Donnelly TT, Al Khater A-H, Al-Bader SB, *et al*. Arab women's breast cancer screening practices: a literature review. *Asian Pac J Cancer Prev* 2013;14:4519–28. doi:10.7314/apjcp.2013.14.8.4519.

- 1  
2  
3 4. El Saghir NS, Khalil MK, Eid T, *et al.* Trends in epidemiology and management of breast  
4 cancer in developing Arab countries: a literature and registry analysis. *Int J Surg*  
5 2007;5:225–33. doi:10.1016/j.ijso.2006.06.015.  
6  
7
- 8 5. Harford JB. Breast-cancer early detection in low-income and middle-income countries:  
9 do what you can versus one size fits all. *Lancet Oncol* 2011;12:306–12.  
10 doi:10.1016/S1470-2045(10)70273-4.  
11
- 12 6. Richards MA, Westcombe AM, Love SB, *et al.* Influence of delay on survival in patients  
13 with breast cancer: a systematic review. *Lancet* 1999;353:1119–26. doi:10.1016/s0140-  
14 6736(99)02143-1.  
15
- 16 7. Butler J, Foot C, Bomb M, *et al.* The International Cancer Benchmarking Partnership: an  
17 international collaboration to inform cancer policy in Australia, Canada, Denmark,  
18 Norway, Sweden and the United Kingdom. *Health Policy* 2013;112:148–55.  
19 doi:10.1016/j.healthpol.2013.03.021.  
20
- 21 8. Al-Azri MH. Delay in cancer diagnosis: causes and possible solutions. *Oman Med J*  
22 2016;31:325–6. doi:10.5001/omj.2016.65.  
23
- 24 9. Macleod U, Mitchell ED, Burgess C, *et al.* Risk factors for delayed presentation and  
25 referral of symptomatic cancer: evidence for common cancers. *Br J Cancer*  
26 2009;101:S92–101. doi:10.1038/sj.bjc.6605398.  
27
- 28 10. Hisham AN, Yip C-H. Overview of breast cancer in Malaysian women: a problem with  
29 late diagnosis. *Asian J Surg.* 2004;27:130–3. doi:10.1016/S1015-9584(09)60326-2.  
30
- 31 11. Gorin SS, Heck JE, Cheng B, *et al.* Delays in breast cancer diagnosis and treatment by  
32 racial/ethnic group. *Arch Intern Med.* 2006;166:2244–52.  
33 doi:10.1001/archinte.166.20.2244.  
34
- 35 12. Aziz NM, Rowland JH. Cancer survivorship research among ethnic minority and  
36 medically underserved groups. *Oncol Nurs Forum.* 2002;29:789–801.  
37 doi:10.1188/02.ONF.789-801.  
38
- 39 13. Al-Lawati JA, Al-Zakwani I, Fadhil I, *et al.* Cancer incidence in Oman (1996-2015).  
40 *Oman Med J.* 2019;34:271–3. doi:10.5001/omj.2019.55.  
41
- 42 14. Kumar S, Burney IA, Al-Ajmi A, *et al.* Changing trends of breast cancer survival in  
43 Sultanate of Oman. *J Oncol.* 2011;2011:316243. doi:10.1155/2011/316243.  
44
- 45 15. Al-Azri M, Al-Awisi H, Al-Rasbi S, *et al.* Psychosocial impact of breast cancer diagnosis  
46 among Omani women. *Oman Med J.* 2014;29:437–44. doi:10.5001/omj.2014.115.  
47  
48  
49  
50  
51  
52  
53  
54  
55  
56  
57  
58  
59  
60

16. Al-Bahri A, Al-Moundhri M, Al-Mandhari Z, *et al.* The role of patients' families in treatment decision-making among adult cancer patients in the Sultanate of Oman. *Eur J Cancer Care (Engl)*. 2018;27:e12845. doi:10.1111/ecc.12845.
17. Al-Bahri A, Al-Moundhri M, Al-Mandhari Z, *et al.* Role of the family in treatment decision-making process for Omani women diagnosed with breast cancer. *Patient Educ Couns*. 2019;102:352–9. doi:10.1016/j.pec.2018.08.026.
18. Burney IA, Al Moundhri MS, Rizvi AJ, *et al.* Outcome as a measure of quality of care in oncology: experience at Sultan Qaboos University Hospital, Oman. *Sultan Qaboos Univ Med J*. 2008;8:27–36.
19. Cancer Research UK. Breast Module of the Cancer Awareness Measure (Breast-CAM) Toolkit. Available: [https://www.cancerresearchuk.org/sites/default/files/health\\_professional\\_breast\\_cam\\_toolkit\\_09.02.11.pdf](https://www.cancerresearchuk.org/sites/default/files/health_professional_breast_cam_toolkit_09.02.11.pdf) [Accessed July 2020].
20. Linsell L, Forbes LJJ, Burgess C, *et al.* Validation of a measurement tool to assess awareness of breast cancer. *Eur J Cancer*. 2010;46:1374–81. doi:10.1016/j.ejca.2010.02.034.
21. Forbes LJJ, Simon AE, Warburton F, *et al.* Differences in cancer awareness and beliefs between Australia, Canada, Denmark, Norway, Sweden and the UK (the International Cancer Benchmarking Partnership): do they contribute to differences in cancer survival? *Br J Cancer*. 2013;108:292–300. doi:10.1038/bjc.2012.542.
22. Rose PW, Hamilton W, Aldersey K, *et al.* Development of a survey instrument to investigate the primary care factors related to differences in cancer diagnosis between international jurisdictions. *BMC Fam Pract*. 2014;15:122. doi:10.1186/1471-2296-15-122.
23. Kim Y, Yoo K-Y, Goodman MT. Differences in incidence, mortality and survival of breast cancer by regions and countries in Asia and contributing factors. *Asian Pac J Cancer Prev*. 2015;16:2857–70. doi:10.7314/apjcp.2015.16.7.2857.
24. Al-Azri M, Al-Rubaie K, Al-Ghafri S, *et al.* Barriers and attitudes toward breast cancer screening among Omani women. *Asian Pac J Cancer Prev*. 2020;21:1339–47. doi:10.31557/APJCP.2020.21.5.1339.
25. Karayurt O, Ozmen D, Cetinkaya AC. Awareness of breast cancer risk factors and practice of breast self examination among high school students in Turkey. *BMC Public Health*. 2008;8:359. doi:10.1186/1471-2458-8-359.

- 1  
2  
3 26. Quaife SL, Forbes LJJ, Ramirez AJ, *et al.* Recognition of cancer warning signs and  
4 anticipated delay in help-seeking in a population sample of adults in the UK. *Br J Cancer.*  
5 2014;110:12–8. doi:10.1038/bjc.2013.684.  
6  
7
- 8 27. Al-Azri M, Al-Saidi M, AL-Mutair E, *et al.* Awareness of risk factors, symptoms and  
9 time to seek medical help of ovarian cancer amongst Omani women attending teaching  
10 hospital in Muscat Governorate, Oman. *Asian Pac J Cancer Prev.* 2018;19:1833–43.  
11 doi:10.22034/APJCP.2018.19.7.1833.  
12  
13
- 14 28. Bish A, Ramirez A, Burgess C, *et al.* Understanding why women delay in seeking help  
15 for breast cancer symptoms. *J Psychosom Res.* 2005;58:321–6.  
16 doi:10.1016/j.jpsychores.2004.10.007.  
17  
18
- 19 29. Ministry of Health, Oman. Ministry of Health Directorate General of Private Health  
20 Establishments referral policy. Available:  
21 [https://www.moh.gov.om/documents/10181/667459/Refferal+Policy.pdf/2705a237-9a47-](https://www.moh.gov.om/documents/10181/667459/Refferal+Policy.pdf/2705a237-9a47-428d-91e3-5a1a08baaa07)  
22 [428d-91e3-5a1a08baaa07](https://www.moh.gov.om/documents/10181/667459/Refferal+Policy.pdf/2705a237-9a47-428d-91e3-5a1a08baaa07) [Accessed July 2020].  
23  
24
- 25 30. Al-Azri MH, Al-Awisi H, Al-Rasbi S, *et al.* Coping with a diagnosis of breast cancer  
26 among Omani women. *J Health Psychol.* 2014;19:836–46.  
27 doi:10.1177/1359105313479813.  
28  
29
- 30 31. Al-Azri M, Al-Awisi H, Al-Moundhri M. Coping with a diagnosis of breast cancer-  
31 literature review and implications for developing countries. *Breast J.* 2009;15:615–22.  
32 doi:10.1111/j.1524-4741.2009.00812.x.  
33  
34
- 35 32. Al-Lawati T, Mehdi I, Al Bahrani B, *et al.* Does alternative and traditional wasam (local  
36 cauterium) therapy facilitate an early and more extensive locoregional metastasis of breast  
37 cancer? *Gulf J Oncolog.* 2016;1:37–42.  
38  
39
- 40 33. Andersen RS, Vedsted P, Olesen F, *et al.* Patient delay in cancer studies: a discussion of  
41 methods and measures. *BMC Health Serv Res.* 2009;9:189. doi:10.1186/1472-6963-9-  
42 189.  
43  
44
- 45 34. Scott SE, Walter FM, Webster A, *et al.* The model of pathways to treatment:  
46 conceptualization and integration with existing theory. *Br J Health Psychol.* 2013;18:45–  
47 65. doi:10.1111/j.2044-8287.2012.02077.x.  
48  
49
- 50 35. Coxon D, Campbell C, Walter FM, *et al.* The Aarhus statement on cancer diagnostic  
51 research: turning recommendations into new survey instruments. *BMC Health Serv Res.*  
52 2018;18:677. doi:10.1186/s12913-018-3476-0.  
53  
54  
55  
56  
57  
58  
59  
60

- 1  
2  
3 36. Rose PW, Rubin G, Perera-Salazar R, *et al.* Explaining variation in cancer survival  
4 between 11 jurisdictions in the International Cancer Benchmarking Partnership: a primary  
5 care vignette survey. *BMJ Open.* 2015;5:e007212. doi:10.1136/bmjopen-2014-007212.  
6  
7  
8  
9  
10  
11  
12  
13  
14  
15  
16  
17  
18  
19  
20  
21  
22  
23  
24  
25  
26  
27  
28  
29  
30  
31  
32  
33  
34  
35  
36  
37  
38  
39  
40  
41  
42  
43  
44  
45  
46  
47  
48  
49  
50  
51  
52  
53  
54  
55  
56  
57  
58  
59  
60

For peer review only

**Table 1:** Sociodemographic and clinical characteristics as stated by the participants

| <b>Variables</b>                                                        | <b>n (300)</b> | <b>%</b> |
|-------------------------------------------------------------------------|----------------|----------|
| <b><i>Age (years) (n = 298)</i></b>                                     |                |          |
| ≤ 40                                                                    | 109            | 36.6     |
| 41–50                                                                   | 88             | 29.5     |
| > 50                                                                    | 101            | 33.9     |
| <b><i>Marital status (n = 298)</i></b>                                  |                |          |
| Single                                                                  | 21             | 7.0      |
| Married                                                                 | 227            | 76.2     |
| Divorced                                                                | 11             | 3.7      |
| Widowed                                                                 | 39             | 13.1     |
| <b><i>Origin (n = 297)</i></b>                                          |                |          |
| Muscat                                                                  | 102            | 34.3     |
| Ad Dhahirah                                                             | 33             | 11.1     |
| Al Batinah                                                              | 60             | 20.2     |
| Ad Dakhiliyah                                                           | 40             | 13.5     |
| Al Wusta                                                                | 1              | 0.3      |
| Ash Sharqiyah                                                           | 41             | 13.8     |
| Dhofar                                                                  | 5              | 1.7      |
| Musandam                                                                | 2              | 0.7      |
| Al Buraimi                                                              | 13             | 4.4      |
| <b><i>Educational level (n = 298)</i></b>                               |                |          |
| No formal education                                                     | 105            | 35.2     |
| Primary and elementary                                                  | 37             | 12.4     |
| High school                                                             | 93             | 31.2     |
| College and above                                                       | 63             | 21.1     |
| <b><i>Employment status (n = 293)</i></b>                               |                |          |
| Employed                                                                | 97             | 33.1     |
| Unemployed/Housewife                                                    | 196            | 66.9     |
| <b><i>Monthly family income in OMR (n = 281)</i></b>                    |                |          |
| ≤ 500                                                                   | 110            | 39.1     |
| 501–1,000                                                               | 99             | 35.2     |
| > 1,000                                                                 | 72             | 25.6     |
| <b><i>Family history of BC (n = 299)</i></b>                            |                |          |
| Yes                                                                     | 81             | 27.1     |
| No                                                                      | 218            | 72.9     |
| <b><i>If yes, degree of relationship (n = 80)</i></b>                   |                |          |
| First-degree                                                            | 29             | 36.3     |
| Second-degree                                                           | 32             | 40.0     |
| Third-degree                                                            | 19             | 23.8     |
| <b><i>Overall length of time since diagnosis (months) (n = 297)</i></b> |                |          |
| < 3                                                                     | 46             | 15.5     |
| 3–6                                                                     | 165            | 55.6     |
| 6–12                                                                    | 86             | 29.0     |
| <b><i>Stage of BC at diagnosis (n = 299)</i></b>                        |                |          |
| Stage I                                                                 | 62             | 20.7     |
| Stage II                                                                | 81             | 27.1     |
| Stage III                                                               | 55             | 18.4     |
| Stage IV                                                                | 45             | 15.1     |
| I don't know                                                            | 56             | 18.7     |
| <b><i>Treatment modality at time of interview (n = 261)</i></b>         |                |          |
| Radiotherapy                                                            | 135            | 51.7     |
| Hormonal therapy                                                        | 94             | 36.0     |
| Targeted biological therapy                                             | 37             | 14.2     |
| Chemotherapy                                                            | 202            | 77.4     |
| Surgery                                                                 | 154            | 59.0     |

1  
2  
3  
4  
5  
6  
7  
8  
9  
10  
11  
12  
13  
14  
15  
16  
17  
18  
19  
20  
21  
22  
23  
24  
25  
26  
27  
28  
29  
30  
31  
32  
33  
34  
35  
36  
37  
38  
39  
40  
41  
42  
43  
44  
45  
46  
47  
48  
49  
50  
51  
52  
53  
54  
55  
56  
57  
58  
59  
60

|                  |    |      |
|------------------|----|------|
| I don't remember | 33 | 12.6 |
|------------------|----|------|

BC: breast cancer; OMR: Omani riyal.

For peer review only



1  
2  
3 **Figure 1:** General knowledge of breast cancer and delays in diagnosis  
4  
5  
6  
7  
8  
9  
10  
11  
12  
13  
14  
15  
16  
17  
18  
19  
20  
21  
22  
23  
24  
25  
26  
27  
28  
29  
30  
31  
32  
33  
34  
35  
36  
37  
38  
39  
40  
41  
42  
43  
44  
45  
46

For peer review only

1  
2  
3  
4  
5  
6  
7  
8  
9  
10  
11  
12  
13  
14  
15  
16  
17  
18  
19  
20  
21  
22  
23  
24  
25  
26  
27  
28  
29  
30  
31  
32  
33  
34  
35  
36  
37  
38  
39  
40  
41  
42  
43  
44  
45  
46

**Figure 2:** Knowledge of specific signs and symptoms of breast cancer

For peer review only

1  
2  
3 **Figure 3:** Barriers to medical help-seeking  
4  
5  
6  
7  
8  
9  
10  
11  
12  
13  
14  
15  
16  
17  
18  
19  
20  
21  
22  
23  
24  
25  
26  
27  
28  
29  
30  
31  
32  
33  
34  
35  
36  
37  
38  
39  
40  
41  
42  
43  
44  
45  
46

For peer review only

**Table 2:** Association between sociodemographic characteristics and knowledge of breast cancer symptoms

| Characteristics                     | Knowledge of BC symptoms, OR (95% CI) |                              |                                     |                            |                    |                         |                  |
|-------------------------------------|---------------------------------------|------------------------------|-------------------------------------|----------------------------|--------------------|-------------------------|------------------|
|                                     | Changes in the position of the nipple | Pain in the breast or armpit | Lump/tumour in the breast or armpit | Redness of the breast skin | Fatigue            | Unexplained weight loss | Loss of appetite |
| <b>Age (years)</b>                  |                                       |                              |                                     |                            |                    |                         |                  |
| ≤ 40                                | 0.71 (0.24–2.07)                      | 1.41 (0.42–0.47)             | 1.12 (0.31–4.0)                     | 0.95 (0.30–2.97)           | 0.69 (0.26–1.82)   | 1.04 (0.37–2.93)        | 0.62 (0.23–1.69) |
| 41–50                               | 0.99 (0.35–2.82)                      | 2.11 (0.61–7.34)             | 1.27 (0.37–4.40)                    | 0.74 (0.27–2.05)           | 0.82 (0.32–2.08)   | 1.11 (0.40–3.06)        | 0.81 (0.31–2.14) |
| > 50                                | 1.0                                   | 1.0                          | 1.0                                 | 1.0                        | 1.0                | 1.0                     | 1.0              |
| <b>Marital status</b>               |                                       |                              |                                     |                            |                    |                         |                  |
| Single                              | 0.68 (0.10–4.45)                      | 0.23 (0.03–1.75)             | 0.39 (0.05–2.88)                    | 2.53 (0.26–24.41)          | 0.37 (0.09–1.58)   | 0.52 (0.10–2.60)        | 0.82 (0.17–3.90) |
| Married                             | 0.605 (0.22–1.69)                     | 0.53 (0.16–1.78)             | 0.82 (0.24–2.82)                    | 1.65 (0.66–4.13)           | 0.97 (0.39–2.39)   | 0.89 (0.33–2.35)        | 1.22 (0.50–2.99) |
| Divorced/Widowed                    | 1.0                                   | 1.0                          | 1.0                                 | 1.0                        | 1.0                | 1.0                     | 1.0              |
| <b>Educational level</b>            |                                       |                              |                                     |                            |                    |                         |                  |
| No formal education                 | 0.16 (0.03–0.81)*                     | 0.10 (0.01–0.86)*            | 0.93 (0.14–6.36)                    | 2.97 (0.05–1.62)           | 1.13 (0.27–4.80)   | 0.29 (0.06–1.42)        | 0.37 (0.09–1.56) |
| Primary and elementary              | 0.49 (0.08–2.87)                      | 0.10 (0.01–0.84)*            | 0.73 (0.11–4.96)                    | 0.27 (0.05–1.47)           | 1.18 (0.27–5.08)   | 0.18 (0.04–0.88)*       | 0.29 (0.07–1.19) |
| High school                         | 0.97 (0.24–3.85)                      | 0.60 (0.09–4.10)             | 7.28 (1.06–50.19)*                  | 1.19 (0.28–5.18)           | 3.82 (1.08–13.58)* | 0.72 (0.19–2.68)        | 1.41 (0.44–4.53) |
| College and above                   | 1.0                                   | 1.0                          | 1.0                                 | 1.0                        | 1.0                | 1.0                     | 1.0              |
| <b>Employment status</b>            |                                       |                              |                                     |                            |                    |                         |                  |
| Employed                            | 0.83 (0.28–2.50)                      | 1.60(0.37–6.83)              | 1.78 (0.38–8.12)                    | 2.53 (0.74–8.59)           | 4.18 (1.34–13.05)* | 1.18 (0.41–3.43)        | 1.45 (0.54–3.95) |
| Unemployed/Housewife                | 1.0                                   | 1.0                          | 1.0                                 | 1.0                        | 1.0                | 1.0                     | 1.0              |
| <b>Monthly family income in OMR</b> |                                       |                              |                                     |                            |                    |                         |                  |
| ≤ 500                               | 1.22 (0.37–4.04)                      | 4.14 (1.14–15.12)*           | 1.54 (0.35–6.80)                    | 3.58 (1.11–11.52)*         | 1.49 (0.51–4.35)   | 1.89 (0.60–5.92)        | 2.66 (0.92–7.72) |
| 501–1,000                           | 0.98 (0.32–2.97)                      | 1.98 (0.58-6.76)             | 0.58 (0.16–2.09)                    | 3.33 (1.07–10.43)*         | 1.15 (0.43–3.06)   | 0.83 (0.30–2.29)        | 1.06 (0.42–2.65) |
| > 1,000                             | 1.0                                   | 1.0                          | 1.0                                 | 1.0                        | 1.0                | 1.0                     | 1.0              |
| <b>Family history of BC</b>         |                                       |                              |                                     |                            |                    |                         |                  |
| Yes                                 | 0.50 (0.20–1.23)                      | 0.48 (0.17–1.41)             | 0.42 (0.13–1.33)                    | 0.54 (0.22–1.32)           | 0.39 (0.17–0.91)   | 0.52 (0.22–1.24)        | 0.73 (0.34–1.56) |
| No                                  | 1.0                                   | 1.0                          | 1.0                                 | 1.0                        | 1.0                | 1.0                     | 1.0              |
| <b>Family history of any cancer</b> |                                       |                              |                                     |                            |                    |                         |                  |
| Yes                                 | 0.74 (0.31–1.75)                      | 0.73 (0.26–2.0)              | 0.93 (0.33–2.58)                    | 1.04 (0.45–2.38)           | 1.61 (0.80–3.26)   | 1.10 (0.50–2.43)        | 1.22 (0.59–2.51) |
| No                                  | 1.0                                   | 1.0                          | 1.0                                 | 1.0                        | 1.0                | 1.0                     | 1.0              |

BC: breast cancer; OR: odds ratio; CI: confidence interval; OMR: Omani riyal.

\*Significant at the p <0.05 level.

**Table 3:** Time taken for medical consultation, referral, and treatment of breast cancer as stated by the participants

| Variables                                                                                                       | n (300) | %    |
|-----------------------------------------------------------------------------------------------------------------|---------|------|
| <b>Initial response upon first noticing possible BC symptoms (n = 296)</b>                                      |         |      |
| Informing husband                                                                                               | 119     | 40.2 |
| Informing family members                                                                                        | 108     | 36.5 |
| Seeing a doctor in a government hospital                                                                        | 25      | 8.4  |
| Seeing a doctor in a local health centre                                                                        | 24      | 8.1  |
| Seeing a doctor in a private sector facility                                                                    | 7       | 2.4  |
| Traveling abroad                                                                                                | 6       | 2.0  |
| Informing friends                                                                                               | 5       | 1.7  |
| Using traditional/herbal medicine                                                                               | 2       | 0.7  |
| <b>Approximate duration of symptom(s) before contacting a doctor (n = 298)</b>                                  |         |      |
| < 1 week                                                                                                        | 93      | 31.2 |
| 1–2 weeks                                                                                                       | 46      | 15.4 |
| 3–4 weeks                                                                                                       | 59      | 19.8 |
| 5–7 weeks                                                                                                       | 24      | 8.1  |
| 2–5 months                                                                                                      | 38      | 12.8 |
| 6–12 months                                                                                                     | 18      | 6.0  |
| > 12 months                                                                                                     | 20      | 6.7  |
| <b>Length of time between contacting a doctor and getting an appointment (n = 294)</b>                          |         |      |
| Same/next day                                                                                                   | 52      | 17.7 |
| < 1 week                                                                                                        | 78      | 26.5 |
| 1–2 weeks                                                                                                       | 61      | 20.7 |
| 3–4 weeks                                                                                                       | 54      | 18.4 |
| 1–2 months                                                                                                      | 35      | 11.9 |
| > 3 months                                                                                                      | 14      | 4.8  |
| <b>Number of medical visits before being diagnosed</b>                                                          |         |      |
| <b>At local health centres (n = 155)</b>                                                                        |         |      |
| 1                                                                                                               | 105     | 67.7 |
| 2                                                                                                               | 27      | 17.4 |
| 3                                                                                                               | 23      | 14.8 |
| <b>At government hospitals (n = 209)</b>                                                                        |         |      |
| 1                                                                                                               | 63      | 30.1 |
| 2                                                                                                               | 44      | 21.1 |
| 3                                                                                                               | 47      | 22.5 |
| ≥ 4                                                                                                             | 55      | 26.3 |
| <b>Length of time between being referred to hospital and getting an appointment with a specialist (n = 296)</b> |         |      |
| < 1 week                                                                                                        | 117     | 39.5 |
| 1–2 weeks                                                                                                       | 94      | 31.8 |
| 3–4 weeks                                                                                                       | 58      | 19.6 |
| 5–7 weeks                                                                                                       | 12      | 4.1  |
| 2–5 months                                                                                                      | 8       | 2.7  |
| 6–12 months                                                                                                     | 3       | 1.0  |
| > 12 months                                                                                                     | 4       | 1.4  |
| <b>Approximate length of time between first medical appointment and diagnosis (n = 297)</b>                     |         |      |
| Same/next day                                                                                                   | 31      | 10.4 |
| < 1 week                                                                                                        | 72      | 24.2 |
| 1–2 weeks                                                                                                       | 92      | 31.0 |
| 3–4 weeks                                                                                                       | 53      | 17.8 |
| 1–2 months                                                                                                      | 30      | 10.1 |
| 3–6 months                                                                                                      | 10      | 3.4  |
| > 6 months                                                                                                      | 9       | 3.0  |
| <b>Length of time between diagnosis and first receiving treatment (n = 294)</b>                                 |         |      |

|            |    |      |
|------------|----|------|
| < 1 week   | 88 | 29.9 |
| 1–2 weeks  | 84 | 28.6 |
| 3–4 weeks  | 58 | 19.7 |
| 1–2 months | 46 | 15.6 |
| > 3 months | 18 | 6.1  |

BC: breast cancer.

For peer review only

**Figure 1:** General knowledge of breast cancer and delays in diagnosis

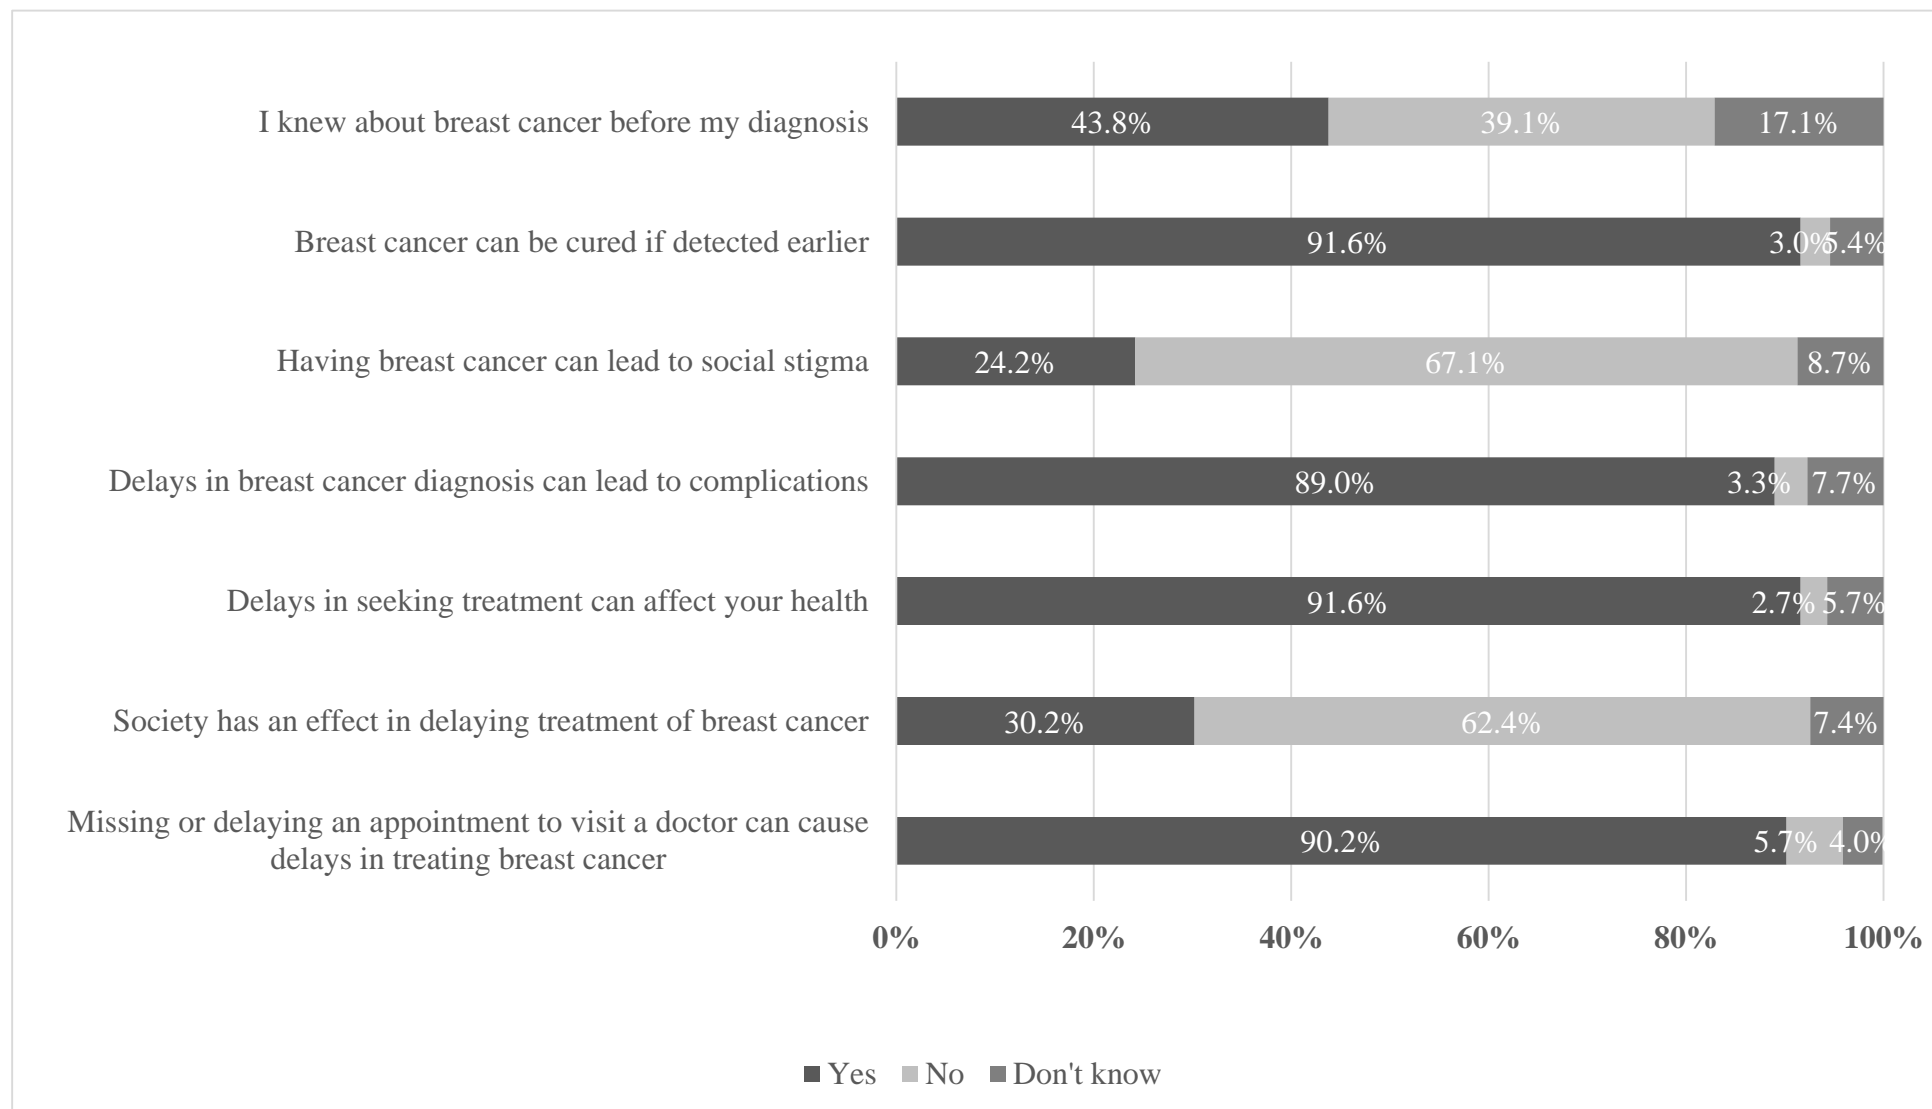

**Figure 2:** Knowledge of specific signs and symptoms of breast cancer

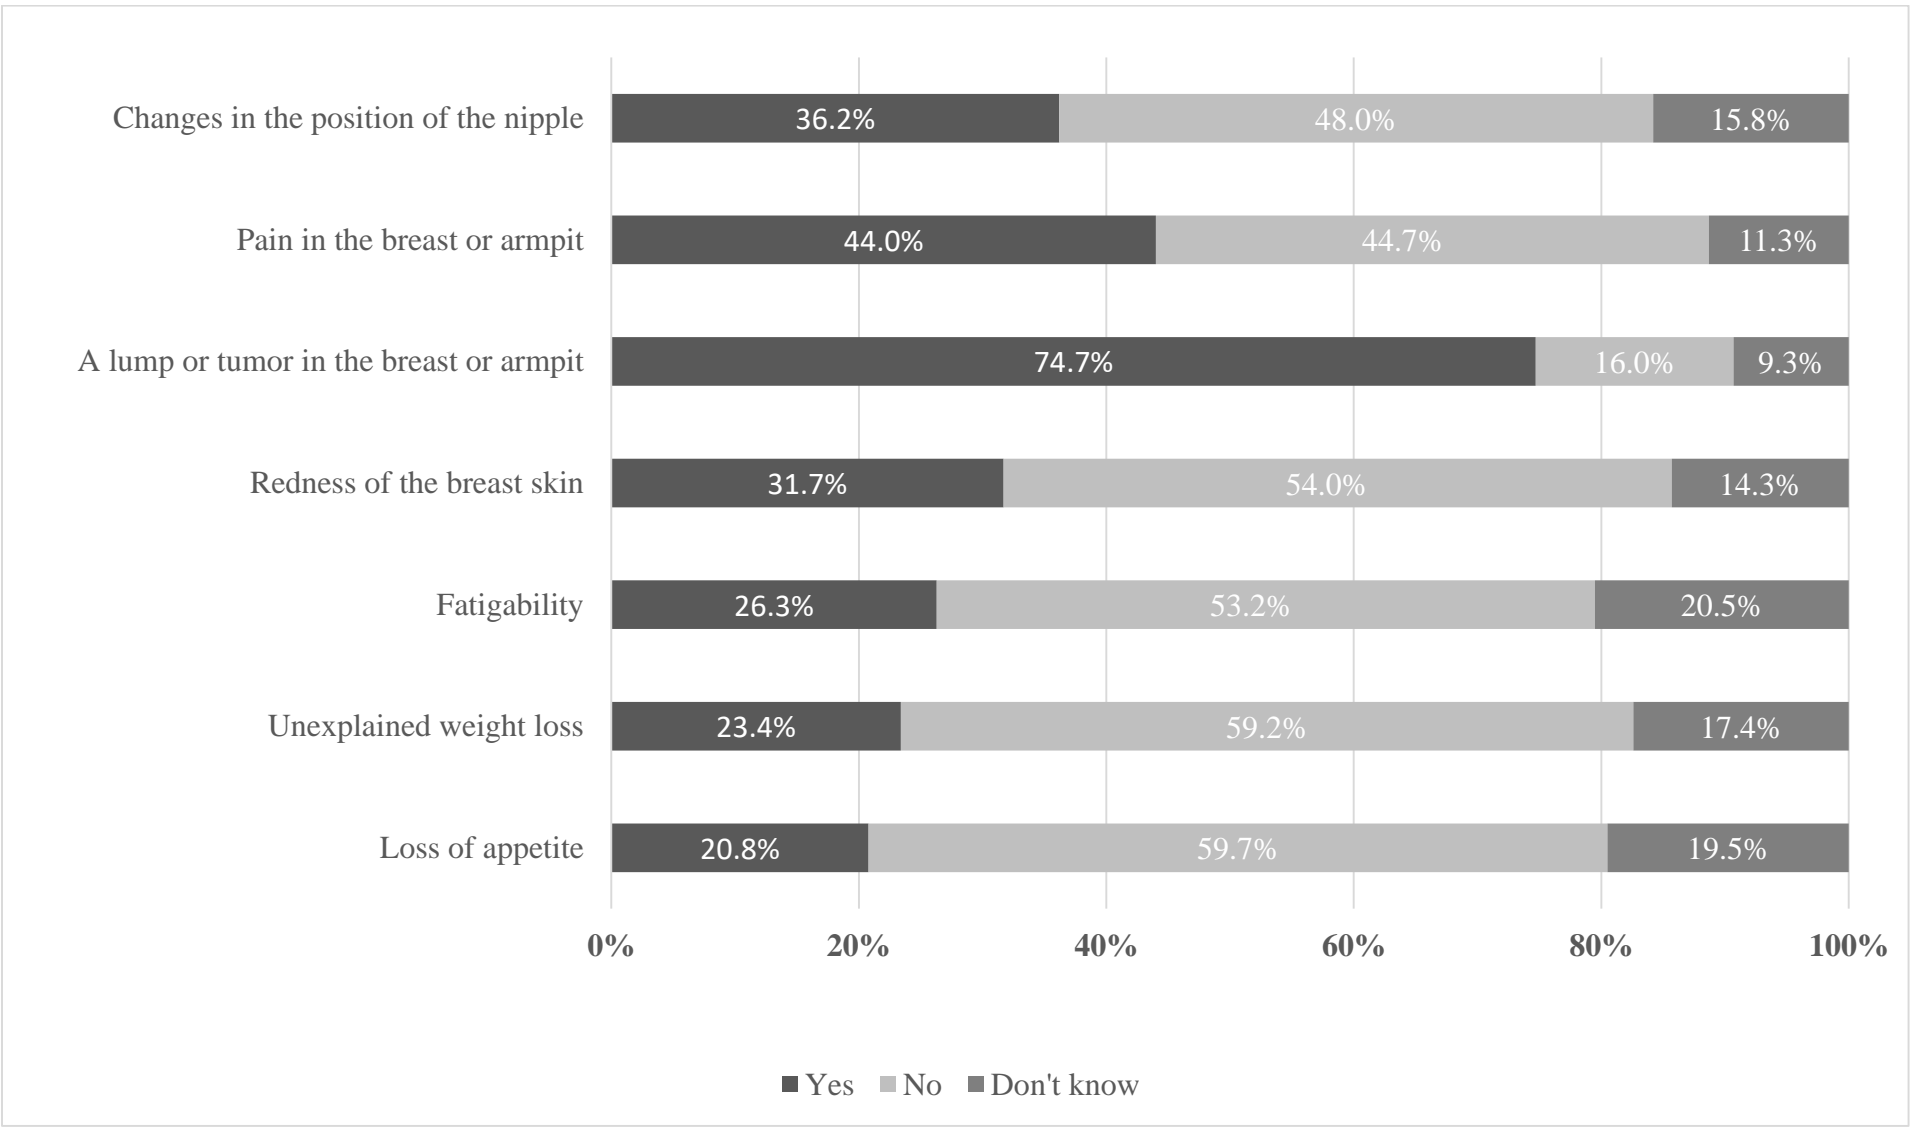



**Figure 3: Barriers to medical help-seeking**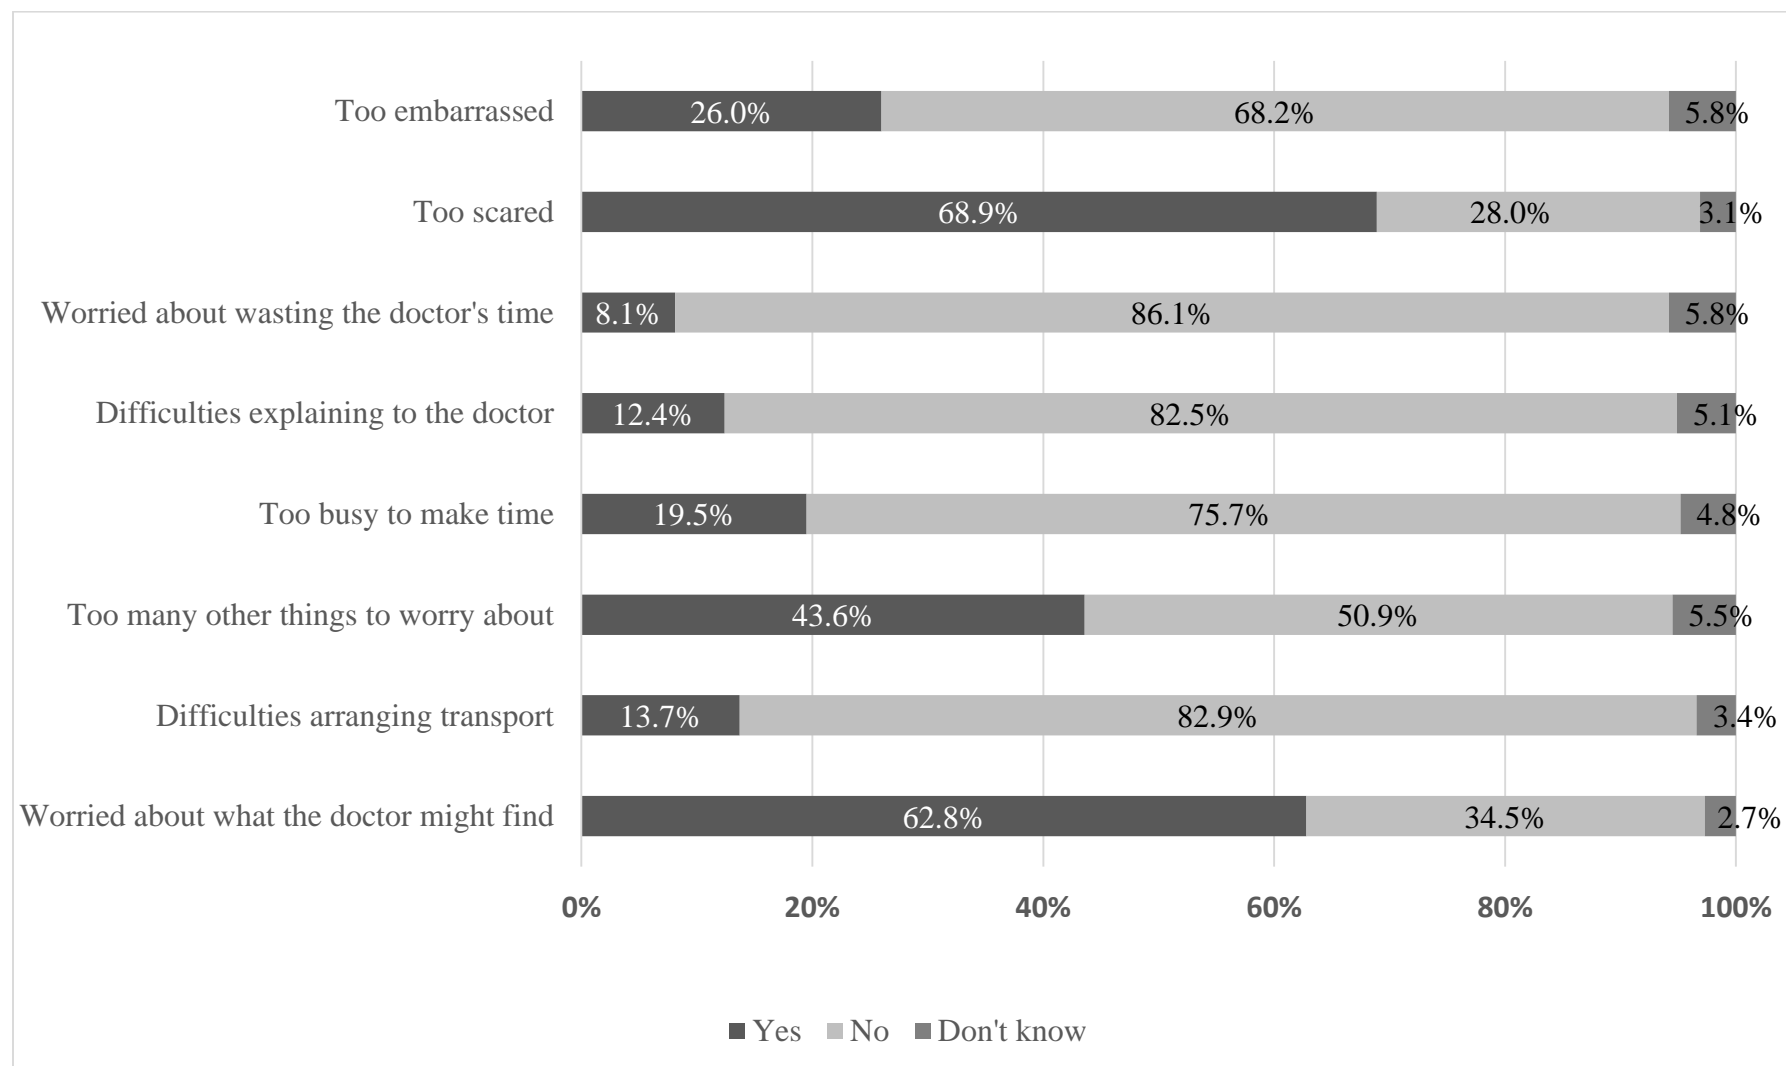

# BMJ Open

## Knowledge of symptoms, time to presentation and barriers to medical help-seeking among Omani women diagnosed with breast cancer - A cross-sectional study

|                                 |                                                                                                                                                                                                                                                                                                                                                                                                                                                                                                                                                                                                                                                   |
|---------------------------------|---------------------------------------------------------------------------------------------------------------------------------------------------------------------------------------------------------------------------------------------------------------------------------------------------------------------------------------------------------------------------------------------------------------------------------------------------------------------------------------------------------------------------------------------------------------------------------------------------------------------------------------------------|
| Journal:                        | <i>BMJ Open</i>                                                                                                                                                                                                                                                                                                                                                                                                                                                                                                                                                                                                                                   |
| Manuscript ID                   | bmjopen-2020-043976.R2                                                                                                                                                                                                                                                                                                                                                                                                                                                                                                                                                                                                                            |
| Article Type:                   | Original research                                                                                                                                                                                                                                                                                                                                                                                                                                                                                                                                                                                                                                 |
| Date Submitted by the Author:   | 28-Nov-2020                                                                                                                                                                                                                                                                                                                                                                                                                                                                                                                                                                                                                                       |
| Complete List of Authors:       | Al-Azri, Mohammed; Sultan Qaboos University, Family Medicine and Public Health;<br>Al-Baimani, Khalid ; Sultan Qaboos University, Oncology Unit, Department of Medicine<br>Al-Awaisi, Huda ; Sultan Qaboos University, Nursing Directorate, Sultan Qaboos University Hospital<br>Al-Mandhari, Zahid ; The Royal Hospital<br>Al-Khamayasi, Jasem ; Sultan Qaboos University, College of Medicine and Health Sciences<br>Al-Lawati, Yaseen ; Sultan Qaboos University, College of Medicine and Health Sciences<br>Panchatcharam, Sathiya Murthi ; Oman Medical Speciality Board, Research Section, Medical Simulation and Skills Development Centre |
| <b>Primary Subject Heading</b>: | Oncology                                                                                                                                                                                                                                                                                                                                                                                                                                                                                                                                                                                                                                          |
| Secondary Subject Heading:      | Health services research                                                                                                                                                                                                                                                                                                                                                                                                                                                                                                                                                                                                                          |
| Keywords:                       | PREVENTIVE MEDICINE, Adult oncology < ONCOLOGY, Breast tumours < ONCOLOGY                                                                                                                                                                                                                                                                                                                                                                                                                                                                                                                                                                         |
|                                 |                                                                                                                                                                                                                                                                                                                                                                                                                                                                                                                                                                                                                                                   |

SCHOLARONE™  
Manuscripts



I, the Submitting Author has the right to grant and does grant on behalf of all authors of the Work (as defined in the below author licence), an exclusive licence and/or a non-exclusive licence for contributions from authors who are: i) UK Crown employees; ii) where BMJ has agreed a CC-BY licence shall apply, and/or iii) in accordance with the terms applicable for US Federal Government officers or employees acting as part of their official duties; on a worldwide, perpetual, irrevocable, royalty-free basis to BMJ Publishing Group Ltd ("BMJ") its licensees and where the relevant Journal is co-owned by BMJ to the co-owners of the Journal, to publish the Work in this journal and any other BMJ products and to exploit all rights, as set out in our [licence](#).

The Submitting Author accepts and understands that any supply made under these terms is made by BMJ to the Submitting Author unless you are acting as an employee on behalf of your employer or a postgraduate student of an affiliated institution which is paying any applicable article publishing charge ("APC") for Open Access articles. Where the Submitting Author wishes to make the Work available on an Open Access basis (and intends to pay the relevant APC), the terms of reuse of such Open Access shall be governed by a Creative Commons licence – details of these licences and which [Creative Commons](#) licence will apply to this Work are set out in our licence referred to above.

Other than as permitted in any relevant BMJ Author's Self Archiving Policies, I confirm this Work has not been accepted for publication elsewhere, is not being considered for publication elsewhere and does not duplicate material already published. I confirm all authors consent to publication of this Work and authorise the granting of this licence.

1  
2  
3 **Knowledge of symptoms, time to presentation and barriers to medical help-**  
4 **seeking among Omani women diagnosed with breast cancer - A cross-**  
5 **sectional study**  
6  
7  
8  
9

10 Mohammed Al-Azri<sup>1\*</sup>, Khalid Al-Baimani<sup>2</sup>, Huda Al-Awaisi<sup>3</sup>, Zahid Al-Mandhari<sup>4</sup>, Jasem Al-  
11 Khamayasi<sup>5</sup>, Yaseen Al-Lawati<sup>5</sup>, Sathiya Murthi Panchatcharam<sup>6</sup>  
12  
13  
14

15  
16 \*Corresponding author: Dr Mohammed Al-Azri

17  
18 Department of Family Medicine and Public Health, College of Medicine and Health Sciences,  
19 Sultan Qaboos University, P O Box 35. Postal Code 123, Muscat, Oman.

20  
21 E mail: [mhalazri@squ.edu.om](mailto:mhalazri@squ.edu.om)

22  
23 Tel: +968 2414 1127

24  
25 Fax: +968 2414 1163  
26  
27

28  
29 **Author affiliations**

30  
31 <sup>1</sup>Department of Family Medicine and Public Health, College of Medicine and Health Sciences,  
32 Sultan Qaboos University, Muscat, Oman.

33  
34 <sup>2</sup>Oncology Unit, Department of Medicine, Sultan Qaboos University Hospital, Muscat, Oman.

35  
36 <sup>3</sup>Nursing Directorate, Sultan Qaboos University Hospital, Muscat, Oman.

37  
38 <sup>4</sup>National Oncology Centre, Radiotherapy Department, Royal Hospital, Muscat, Oman.

39  
40 <sup>5</sup>College of Medicine and Health Sciences, Sultan Qaboos University, Muscat, Oman.

41  
42 <sup>6</sup>Research Section, Medical Simulation and Skills Development Centre, Oman Medical  
43 Specialty Board, Muscat, Oman.  
44

45  
46 **Keywords:** Breast Cancer; Knowledge; Help-Seeking Behavior; Delayed Diagnosis; Time-to-  
47 Treatment; Oman  
48  
49

50  
51 **Word count** = 3,978  
52  
53  
54  
55  
56  
57  
58  
59  
60

## ABSTRACT

**Objectives** To identify knowledge of breast cancer (BC) symptoms, time taken to consult a doctor and factors contributing to delays in medical help-seeking.

**Design** A cross-sectional study of Omani women diagnosed with BC.

**Setting** The two main teaching hospitals in Oman, Royal Hospital and Sultan Qaboos University Hospital.

**Participants** Adult Omani women recently diagnosed with BC.

**Tools** The Breast Cancer Awareness Measure and International Cancer Benchmarking Partnership questionnaire were used to collect data.

**Results** A total of 300 women with BC participated (response rate: 91.0%). The mean age at diagnosis was  $43.0 \pm 12.50$  years and 33.5% were diagnosed at stages III or IV. Although most women (74.4%) recognised breast/armpit lumps to be a symptom of BC, less than half identified other symptoms, including breast/armpit pain (44.0%), changes in the position of the nipple (36.2%), redness (31.7%), fatigue (26.3%), weight loss (23.4%) and loss of appetite (20.8%). While most (91.6%) were aware that BC could be cured if detected early, only 66.4% sought medical help within a month of developing symptoms. Initial responses to symptoms included informing husbands (40.2%) or family members (36.5%). Barriers to seeking medical help included feeling scared (68.9%) and worried about what the doctor might find (62.8%). Highly educated women were more likely to recognise the following as BC symptoms: changes in nipple position (odds ratio (OR): 0.16, 95% confidence interval (CI): 0.03–0.81), breast pain (OR: 0.10, 95% CI 0.01–0.86) and unexplained weight loss (OR: 0.18, 95% CI: 0.04–0.88) (all  $p < 0.05$ ).

**Conclusions** Although many Omani women with BC were aware of the importance of early diagnosis, most demonstrated inadequate knowledge of symptoms, did not prioritise seeking medical help and reported emotional barriers to help-seeking. More educational measures are needed to improve symptom recognition and address help-seeking barriers to minimise delays in diagnosis.

### Strengths and limitations of this study

- This is the first study conducted in Oman to explore time taken to seek medical help and barriers to seeking medical help among women diagnosed with breast cancer (BC).
- Although women were aware of the importance of early BC detection and that delays in seeking medical help could lead to complications, most presented at relatively advanced stages, with the cause for delay usually being due to the patients themselves.
- The initial response upon first noticing possible BC symptoms was to inform husbands and family members rather than seeking medical help.
- The possibility of recall and response bias could not be ruled out due to the use of self-reported questionnaire measures for data collection.
- While the Arabic version of the final questionnaire was assessed for reliability, the validity of this measure was not determined.

## BACKGROUND

Worldwide, breast cancer (BC) accounts for 10% of all cancers diagnosed annually and approximately 15% of all cancer deaths among women.[1] Despite efforts to improve the early detection of BC, nearly one-third of women worldwide have either regional or distant metastasis at the time of diagnosis.[2] In the Gulf Cooperation Council (GCC) region, BC is the most commonly diagnosed cancer among women, accounting for 13–35% of all cancers; moreover, approximately half of BC patients are under 50 years of age at the time of diagnosis, with a median age of 49–52 years compared to 63 years in Western countries.[3] In addition, approximately 58.0% of women in GCC countries present with advanced stages of BC at diagnosis (45% with regional metastasis and 12.8% with distant metastasis).[4]

Nonetheless, there is a high chance of a cure if BC is detected early and adequately treated; for example, women who begin treatment within 3–5 months of developing symptoms have significantly worse survival rates compared to those who seek medical help in <3 months.[5, 6] Delays in cancer diagnosis can occur at any time between the first symptom being noticed and the start of treatment.[7] The most common causes of delay are usually because patients do not correctly identify cancer symptoms or act on them to seek medical help.[8, 9] Low awareness of BC symptoms, lack of access to care, unavailability or non-participation in BC screening, fatalism, negative perceptions of BC and cultural beliefs are all factors which contribute to delays in seeking medical help on the part of patients.[2, 8, 10-12].

The Pathways to Treatment model is a framework which defines the various temporal stages which occur between the onset of recognisable symptoms to the start of treatment and is often used to contextualise the various processes involved in symptom appraisal and help-seeking behaviours.[13] The model is based on the notion that the process of general healthcare-seeking is complex and influenced by a mixture of physical, social and psychological factors. Key time points along the diagnostic pathway include the detection of initial bodily changes (symptoms), the perception of such changes as abnormal (symptom appraisal), the development of perceived reasons to consult with a doctor, the decision and action of consulting the doctor and, finally, the diagnosis and start of the treatment.[13]

In Oman, BC is the most commonly diagnosed cancer and accounts for 12.79% of all cancers and 21.2% of cancers affecting women.[14] Recently, the incidence of BC has almost doubled from 13.6 cases per 100,000 women in 1996 to 26.9 in 2015.[14] Like other GCC

1  
2  
3 countries, the majority of women diagnosed with BC in Oman are younger (median age: 49  
4 years) and present at advanced stages (i.e. stages III and IV), with a low five-year survival rate  
5 (63%).[15] Several factors contribute to delays in cancer diagnosis in Oman, including the lack  
6 of a national screening programme, social stigma, the influence of family, spouses and friends  
7 in treatment decision-making and the prevalence of traditional medicine and medical  
8 tourism.[8, 16-18] Identifying specific factors which contribute to delays in BC diagnosis are  
9 crucial to help improve patient outcomes. The aim of this study was therefore to identify  
10 knowledge of BC symptoms, time taken to seek medical help and barriers to medical help-  
11 seeking among Omani women diagnosed with BC.  
12  
13  
14  
15  
16  
17  
18  
19

## 20 **Methods**

### 21 **Study setting**

22 This cross-sectional study was carried out between November 2018 and April 2019 at the  
23 National Oncology Centre of the Royal Hospital (RH) and the Oncology Unit of the Sultan  
24 Qaboos University Hospital (SQUH), both of which are located in Muscat, the capital city of  
25 Oman. These hospitals represent the two primary oncology centres in Oman and provide  
26 comprehensive treatment (including surgery, chemotherapy and radiotherapy) and palliative  
27 care to patients diagnosed with all types of cancer, including BC.[19] The majority of patients  
28 diagnosed with BC at other regional hospitals of Oman are referred to either RH or SQUH for  
29 treatment.  
30  
31  
32  
33  
34  
35  
36  
37  
38  
39

### 40 **Sample size estimation and recruitment**

41 According to previous data from the National Cancer Registry from 1999 to 2015, the number  
42 of BC patients in 2018 and 2019 was estimated to be 271 based on a linear prediction  
43 model.[14] Thus, Omani women diagnosed with BC at the RH or SQUH during the year prior  
44 to data collection were targeted for inclusion in the current study, as having been diagnosed  
45 more than a year previously could have resulted in recall bias.  
46  
47  
48  
49  
50

51 A total of 330 adult Omani women aged  $\geq 18$  years and diagnosed with BC within the  
52 preceding year at RH or SQUH were identified from the electronic hospital systems and invited  
53 to participate in the study. The names of the patients and the date of their next visit to outpatient  
54 oncology clinics and day care units or admission to wards was identified. Two different  
55 researchers over a period of six months were involved in the data collection process in order to  
56  
57  
58  
59  
60



1  
2  
3 increase the number of participants in the study. Also, women who did not respond were  
4 contacted again and the date of their next appointment recorded.  
5  
6  
7

8 Patients were informed that participation in the study was optional and would not affect the  
9 medical care they received. Only women who agreed to participate were included in the study.  
10 Women who were in obvious distress or pain and those who were admitted because of  
11 complications such as febrile neutropenia were excluded. All participants signed a consent  
12 form prior to taking part in the study.  
13  
14  
15  
16  
17

### 18 **Tool used to measure BC symptom knowledge and barriers to seeking medical help**

19 The Breast Module of the Cancer Awareness Measure (Breast-CAM) was developed by Cancer  
20 Research, King's College London and University College London in the United Kingdom (UK)  
21 and is a valid and reliable instrument for measuring BC awareness in women.[20, 21] It has  
22 moderate to good test-retest reliability for most items, with a good discriminatory index of BC  
23 knowledge and can be administered either face-to-face or via telephone interviews.[20, 21] The  
24 Breast-CAM were intended to be delivered to women in the community and includes different  
25 sections which independently measure and assess the following: knowledge of BC symptoms  
26 (i.e. changes in the nipple, pain or lumps in the breast or armpit, redness, fatigue, unexplained  
27 weight loss and loss of appetite) and barriers to seeking medical help, including emotional (i.e.  
28 being too embarrassed, scared or worried about what the doctor might find), practical (i.e. being  
29 too busy to make time, having too many other things to worry about and anticipating difficulties  
30 explaining concerns to the doctor) and service-related barriers (i.e. difficulties arranging  
31 transport or being worried about wasting the doctor's time).[20]  
32  
33  
34  
35  
36  
37  
38  
39  
40  
41  
42  
43  
44

### 45 **Tool used to measure time taken to seek medical help**

46 The International Cancer Benchmarking Partnership (ICBP) was initiated by the Department  
47 of Health in the UK and was subsequently used as part of a collaborative research project to  
48 study international variations in cancer survival between jurisdictions in six countries,  
49 including Australia, Canada, Denmark, Norway, Sweden and the UK.[7] The module seeks to  
50 measure the overall time interval between the first possible symptom of cancer and the start of  
51 treatment.[7] This overall interval is then divided into subintervals depending on the factor  
52 responsible for the delay, including delays related to the patient's attitudes and help-seeking  
53 behaviours (i.e. their initial response upon first noticing symptoms and the duration of  
54 symptoms before contacting the doctor), the diagnostic process (i.e. time elapsed to secure an  
55  
56  
57  
58  
59  
60

1  
2  
3 appointment to see the doctor, number of medical visits before receiving a diagnosis and time  
4 elapsed between being referred to hospital and getting an appointment with a specialist) and  
5 the treatment or management process (i.e. time elapsed between first medical appointment and  
6 diagnosis and between diagnosis and first receiving treatment).[7] The ICBP questionnaire has  
7 been used in several international studies to investigate root causes of delays in cancer  
8 diagnoses.[22, 23]  
9  
10  
11  
12  
13  
14

15 For the purposes of the current study, the Breast-CAM and ICBP tools were combined into  
16 one questionnaire in order to assess knowledge of BC symptoms, time taken to consult a doctor  
17 and barriers to seeking medical help among Omani women. Sociodemographic variables in the  
18 modules were modified to be relevant to Omani society and the national healthcare system.  
19 Both the Breast-CAM and ICBP tools were translated from English to Arabic and then back-  
20 translated into English.  
21  
22  
23  
24  
25  
26

27 The combined questionnaire was completed by two researchers during face-to-face  
28 interviews conducted with the participants. In order to ensure the clarity and reliability of the  
29 questionnaire, a pilot study was conducted of the first 30 women enrolled in the study. Based  
30 on a standardised item analysis, Cronbach's alpha ( $\alpha$ ) values of the Arabic versions of the  
31 Breast-CAM tool and ICBP questionnaire were 0.88 and 0.85, respectively.  
32  
33  
34  
35  
36  
37

### 38 **Statistical analysis**

39 Data were analysed using SPSS software, version 22 (IBM Corp., Armonk, New York).  
40 Descriptive data were presented as numbers and percentages. A Chi-squared ( $\chi^2$ ) test was used  
41 to determine associations between sociodemographic characteristics and the responses of the  
42 participants. A binary logistic regression model was used to adjust for the effect of certain  
43 factors, with the findings presented as odds ratios (ORs) and 95% confidence intervals (CIs).  
44 A p value of <0.05 was considered significant.  
45  
46  
47  
48  
49  
50

## 51 **Results**

### 52 **Characteristics of the participants**

53 A total of 300 women with BC participated in the study out of 333 eligible subjects, resulting  
54 in a response rate of 91.0%. The mean age was  $47.0 \pm 12.2$  years (median: 45.0 years, range:  
55 24–84 years). The majority were below the age of 50 years (66.1%) and married (76.2%). Over  
56 one-third were residents of Muscat (34.3%) and had no formal education (35.2%). Overall, 81  
57  
58  
59  
60

1  
2  
3 patients (27.1%) reported having a family history of BC, of which the majority (76.3%) were  
4 first- or second-degree relatives. The mean age at BC diagnosis was  $43.0 \pm 12.50$  years.  
5  
6  
7

8 At the time of the interviews, the length of the time since diagnosis was less than three  
9 months in 15.5% of women. Moreover, 33.5% of women had been diagnosed at late stages (i.e.  
10 stages III and IV). The women were receiving various treatments modalities at the time of the  
11 interviews, including chemotherapy, radiotherapy and hormonal therapy (table 1).  
12  
13  
14  
15  
16

### 17 **Knowledge of BC symptoms and barriers to seeking medical help**

18 The majority of women were aware that BC could be cured if detected sufficiently early  
19 (91.6%) and that delays in seeking medical treatment could adversely affect their health  
20 (91.6%). Moreover, the majority were aware that missing or delaying an appointment to visit  
21 the doctor could cause delays in treatment (90.2%) and that delays in diagnosis could lead to  
22 complications (89.0%). On the other hand, less than half of the women (43.8%) had been aware  
23 of BC prior to their diagnosis. Under one-third of the cohort thought that a BC diagnosis could  
24 lead to social stigma (24.2%) and that society had an effect in delaying BC treatment (30.2%)  
25 (figure 1).  
26  
27  
28  
29  
30  
31  
32  
33

34 The majority of women (74.7%) were aware that lumps in the breast or armpit could be  
35 symptoms of BC. However, less than half were aware that pain in the breast or armpit (44.0%),  
36 changes in the position of the nipple (36.2%), redness of the skin of the breast (31.7%), fatigue  
37 (26.3%), unexplained weight loss (23.4%) and loss of appetite (20.8%) were possible BC  
38 symptoms (figure 2). The most commonly reported barriers to seeking medical help were fear  
39 (68.9%), followed by anxiety over what the doctor might find (62.8%), having too many other  
40 things to worry about (43.6%), embarrassment (26.0%), being too busy to make time to go to  
41 the doctor (19.5%), difficulties arranging transport (13.7%), difficulties explaining their  
42 symptoms to the doctor (12.4%) and worry over wasting the doctor's time (8.1%) (figure 3).  
43  
44  
45  
46  
47  
48  
49  
50

### 51 **Associations between sociodemographic characteristics and responses**

52 The binary logistic regression analysis indicated that women who had no formal education  
53 were less likely than those who were highly educated (i.e. college and above) to recognise that  
54 the following were potential symptoms of BC: changes in the position of the nipple (OR 0.16  
55 (95% CI 0.03–0.81)  $p < 0.05$ ), pain in the breast or armpit (OR 0.10 (95% CI 0.01–0.86)  $p$   
56  $< 0.05$ ) and unexplained weight loss (OR 0.18 (95% CI 0.04–0.88)  $p < 0.05$ ). On the other hand,  
57  
58  
59  
60

women educated to the high school level were more likely than college-educated women to recognise that a lump in the breast or armpit (OR 7.28 (95% CI 1.06–50.19)  $p < 0.05$ ) and fatigue (OR 3.82 (95% CI 1.08–13.58)  $p < 0.05$ ) could be BC symptoms.

Employed women were more likely than unemployed women to recognise that fatigue could be a symptom of BC (OR 4.18 (95% CI 1.34–13.05)  $p < 0.05$ ). In addition, women in the lowest income category were more likely than those in the highest category to recognise that pain in the breast or armpit (OR 4.14 (95% CI 1.14–15.12)  $p < 0.05$ ) and redness (OR 3.58 (95% CI 1.11–11.52)  $p < 0.05$ ) could be BC symptoms (table 2).

### **Time taken to seek medical help**

The initial response of most women upon first noticing possible BC symptoms was to inform their husband (40.2%), followed by informing other family members (36.5%) and seeing a doctor at a government hospital (8.4%), local health centre (LHC) (8.1%) or private facility (2.4%); however, few women reported traveling abroad (2.0%), informing friends (1.7%) or using traditional or herbal remedies (0.7%). Of all respondents, less than half (31.2%) decided to see a doctor within the first week of developing possible BC symptoms and 17.7% were able to get an appointment to see a doctor on the same day or the next day following their decision to seek medical help.

The majority of women were diagnosed with BC after their first visit to an LHC (67.7%) or to government hospitals (30.1%). Moreover, many women were able to see specialists at government hospitals within less than one week of referral (39.5%) and received confirmation of the diagnosis on the same day or the next day following their first appointment (10.4%). Finally, many women (29.9%) were able to receive their first treatment within the first week of their diagnosis (table 3).

Based on an in-depth regression analysis, no significant associations were observed between sociodemographic variables and awareness of BC symptoms or help-seeking behaviours (i.e. time taken for medical consultation, referral and treatment).

### **Discussion**

To our knowledge, this is the first study conducted in Oman to explore knowledge of BC symptoms, time taken to seek medical help and barriers to seeking medical help among women

1  
2  
3 with BC. The mean age of the women diagnosed with BC in this study was 43 years; this is  
4 much lower than the average age reported in developed countries (mean age: 63 years) and  
5 slightly below that reported in other Arab countries (mean age: 49–52 years).[3] A previous  
6 study conducted in Oman shared similar findings in which the mean age of women diagnosed  
7 with BC was 47 years, with one-third being under 40 years.[15] The younger age of  
8 presentation of women with BC in Oman might be attributable to various factors, including  
9 genetic background, the adoption of more ‘Westernised’ lifestyles (including reduced levels of  
10 physical activity and higher rates of obesity), a decrease in breastfeeding and the presence of  
11 potential carcinogens in the local environment.[24]  
12  
13  
14  
15  
16  
17  
18  
19

20 Although the vast majority of women in this study were aware of the importance of early  
21 BC detection and that delays in seeking medical help could lead to complications, many  
22 nevertheless presented at relatively advanced stages (i.e. stages III or IV). Previous studies  
23 have reported similar findings.[15, 25] Although a large proportion of women in this study  
24 were able to recognise that lumps in the breast or armpit were a possible symptom of BC, the  
25 majority were not aware of other symptoms such as fatigue, unexplained weight loss or loss of  
26 appetite. Indeed, less than half of the women reported having been aware of or knowledgeable  
27 regarding BC prior to their own diagnosis. Researchers have recommended incorporating  
28 information regarding cancer risk factors and symptoms into the school curriculum so as to  
29 increase cancer knowledge in adulthood.[26]  
30  
31  
32  
33  
34  
35  
36  
37  
38  
39

40 Poor awareness of BC symptoms is a predominant reason for delayed presentation to a  
41 doctor, particularly if symptoms are atypical in nature.[9] Most women with BC more  
42 commonly recognise obvious symptoms, such as lumps, compared to more ambiguous  
43 symptoms, such as tiredness, unexplained weight loss and reduced appetite; in fact, delays in  
44 presentation are more likely to occur in BC cases in which the symptoms do not include a breast  
45 lump.[6, 11] Furthermore, knowledge of BC symptoms is a prerequisite for prompt help-  
46 seeking behaviours, particularly if the symptom is perceived to be serious.[27] Uneducated  
47 women in our study were less likely to recognise certain BC symptoms, such as changes in the  
48 position of the nipple, breast or armpit pain and unexplained weight loss. Similar findings have  
49 also been noted among Omani women with ovarian cancer, with more educated women being  
50 more likely to recognise specific symptoms compared to those who were less educated.[28]  
51 Although more educated women in the current study were generally more likely to recognise  
52 BC symptoms compared to less educated women, the opposite was true for certain items.  
53  
54  
55  
56  
57  
58  
59  
60

1  
2  
3 Specifically, women educated to the high school level were more likely than those with college  
4 degrees to understand that lumps in the breast or armpit or fatigue could be BC symptoms.  
5 Similarly, women in the low income group were more likely to understand that pain and  
6 redness could be associated with BC compared to those with high incomes. This contradicts  
7 results reported by a previous study.[28] Reasons for these surprising findings are not clear and  
8 merit further investigation.  
9  
10  
11  
12  
13  
14

15 More than half of women in our study who sought medical help at LHCs or government  
16 hospitals were diagnosed with BC after their first or second visit, indicating that the cause for  
17 any delays in diagnosis was likely due to the patients themselves. Other researchers have  
18 highlighted that not seeking early medical help is a predictor of delayed diagnosis.[8, 29]  
19 Furthermore, the majority of women who were seen at LHCs in the present study were  
20 subsequently seen by specialists within two weeks of referral, with the BC diagnosis confirmed  
21 within another two weeks. Once again, this indicates that factors related to the local health  
22 system do not seem to play a major role in delaying BC diagnoses in Oman. Referral policies  
23 covering specific aspects of patient care are well established to oversee the transfer of patients  
24 from one healthcare setting to another for management.[30] Nonetheless, cancer patients in  
25 Oman, much like those in neighbouring GCC countries, often choose to seek medical help  
26 abroad (i.e. in countries like Thailand or India); this trend can cause delays in diagnosis, with  
27 many patients returning home with additional complications.[16]  
28  
29  
30  
31  
32  
33  
34  
35  
36  
37  
38

39 For the majority of women in the current study, their initial response upon first noticing  
40 possible BC symptoms was to inform their husbands and family members. Becoming aware of  
41 possible symptoms of a life-threatening disease is often associated with feelings of emotional  
42 distress, anxiety and depression; hence, sharing this information with close family members  
43 might offer some emotional relief and support.[31, 32] Indeed, most women in our study  
44 prioritised sharing their symptoms with husbands or family members over consulting a doctor.  
45 This finding might be related to prevailing sociocultural attitudes which are based on a strong  
46 sense of moral responsibility and familial obligation, particularly when it comes to illness.[18]  
47 Furthermore, Omani women diagnosed with BC often rely on their families for emotional,  
48 physical and financial support, which also plays a role in treatment decision-making.[17, 18]  
49 However, the involvement of family members in medical decisions and treatment options can  
50 sometimes delay diagnoses, particularly if these individuals encourage patients to seek medical  
51 treatment abroad or pursue alternative or traditional remedies.[8, 33]  
52  
53  
54  
55  
56  
57  
58  
59  
60



1  
2  
3  
4  
5  
6  
7  
8  
9  
10  
11  
12  
13  
14  
15  
16  
17  
18  
19  
20  
21  
22  
23  
24  
25  
26  
27  
28  
29  
30  
31  
32  
33  
34  
35  
36  
37  
38  
39  
40  
41  
42  
43  
44  
45  
46  
47  
48  
49  
50  
51  
52  
53  
54  
55  
56  
57  
58  
59  
60

Although more than half of the women in our study sought medical help within one month of developing BC symptoms, many nevertheless presented at an advanced stage by the time they were diagnosed. Various psychosocial and cultural beliefs have been attributed to the delayed presentation of BC cases.[16, 29, 31] A previous study from Oman showed that women with BC experienced severe psychosocial distress, including fear of death, social isolation, anxiety regarding the side-effects of treatment and fear that the cancer might spread or interfere with their daily lives.[16] Women who express explicit fears about the consequences of diagnosis and treatment are more reluctant to seek medical help, resulting in a higher chance of delays in diagnosis.[11]

Similarly, many women in our study reported emotional barriers that might contribute to delays in consulting a doctor, such as being scared, embarrassed or worried about what the doctor might find. Symptom appraisal and perception of their severity is a predictor of decisions to seek medical help.[29] Indeed, it is difficult to assess delays in BC presentation, diagnosis and treatment objectively due to variations in how people perceive symptoms and define time intervals.[34] Although there is growing interest in measuring cancer diagnostic time intervals and examining their effect on outcomes, the pathway from symptoms to diagnosis is a complex process as outlined in the Pathways to Treatment framework.[13]

The decision to consult a doctor and seek medical help often relies on a patient's subjective definition of the 'main' symptoms of cancer, which in itself is often influenced by their pre-existing knowledge and perceptions of symptom severity.[35] The presence of chronic diseases or psychological symptoms may also further influence interpretation of these symptoms.[13] Furthermore, international variations in the investigation and referral of cancer patients to secondary care for suspected cancer symptoms can play a critical role in diagnostic delays and cancer outcomes; for instance, countries in which healthcare professionals demonstrate a greater readiness to refer or investigate patients with possible cancer symptoms have demonstrated high rates of cancer survival.[36]

This study has certain limitations. First, many patients in Oman often choose to access healthcare in non-integrated settings; for instance, by attending a mixture of government facilities, private facilities and facilities abroad. Thus, it was difficult in some cases to track the time taken throughout the diagnostic pathway using the three usual component intervals of delay (i.e. patient, primary care and secondary care delays). Apart from self-reported

1  
2  
3 information from the patients, there were no other methods available to measure delays in the  
4 absence of electronic or written tracking data.  
5  
6  
7

8  
9  
10 Second, while we recruited Omani women diagnosed with BC within the previous year  
11 to satisfy the sample size requirements, the possibility of recall bias cannot be ruled out. Third,  
12 although the Arabic version of the combined questionnaire (which incorporated both the  
13 Breast-CAM and ICBP tools) was tested for reliability and demonstrated a satisfactory  
14 Cronbach's alpha ( $\alpha$ ) coefficient, we could not guarantee its validity, which was beyond the  
15 scope of this research. Fourth, we provided women with a predetermined list of BC symptoms  
16 in the Breast-CAM module instead of asking them to demonstrate their own knowledge of such  
17 symptoms; this may have obscured our understanding of how knowledge influenced help-  
18 seeking behaviours. Finally, we used the Breast-CAM section to measure knowledge of BC  
19 symptoms and barriers to seeking medical help among patients who had already been  
20 diagnosed with BC; as this tool was originally designed to be delivered to a community sample,  
21 we could not rule out potential bias in that the participants might have more knowledge of BC  
22 symptoms compared to other Omani women.  
23  
24  
25  
26  
27  
28  
29  
30  
31

### 32 **Conclusion**

33  
34 Omani women with BC demonstrated low levels of knowledge of BC symptoms and  
35 experienced several emotional barriers to seeking medical help; moreover, many were  
36 diagnosed at advanced stages. Despite national efforts to increase BC awareness, further  
37 educational initiatives are needed. Healthcare professionals should visit schools to raise  
38 awareness of BC symptoms and promote early help-seeking behaviours among female students  
39 in different regions of Oman. Employing both social and traditional media campaigns in LHCs  
40 and hospitals might also help to increase BC knowledge. Finally, healthcare professionals  
41 should make more efforts to build a trusting and cooperative relationship with female patients  
42 in order to help address emotional barriers to medical help-seeking, thereby encouraging them  
43 to disclose potential symptoms and thus reducing delays in diagnosis.  
44  
45  
46  
47  
48  
49  
50  
51  
52

### 53 **Acknowledgements**

54  
55 The authors are grateful to the participating patients and to the authorities at RH and SQUH for  
56 allowing this study to take place. They are also grateful to the College of Medicine and Health  
57 Sciences at Sultan Qaboos University for funding the study.  
58  
59  
60



### Contributors

MA, KA, HA, ZM, JA and YA conceived of the study and contributed to its design and implementation. JA and YA collected data. SMP performed the statistical analysis. MA drafted the manuscript. All authors read and approved the final version of the manuscript.

### Funding

This study was funded by an internal grant from the College of Medicine and Health Sciences, Sultan Qaboos University (#IG/MED/FMCO/19/01).

### Patient and public involvement

Patients and/or the public were not involved in the design, conduct, reporting or dissemination of this research.

### Patient consent for publication

Not applicable as no details regarding individual patients have been reported in the manuscript.

### Ethical approval

The study received ethical approval from the Medical Research and Ethics Committee of the College of Medicine and Health Sciences, Sultan Qaboos University (MREC #1809) as well as the Scientific Research Committee of the Royal Hospital (SRC #87/2018). Informed consent was obtained from all participants prior to their inclusion in the study.

### Data availability statement

The datasets used and/or analysed during this study are available from the corresponding author upon reasonable request.

### Competing interests

The authors declare that they have no competing interests.

### References

1. World Health Organization. Cancer: Breast cancer. Available: <https://www.who.int/cancer/prevention/diagnosis-screening/breast-cancer/en/> [Accessed July 2020].

2. Facione NC, Miaskowski C, Dodd MJ, *et al.* The self-reported likelihood of patient delay in breast cancer: new thoughts for early detection. *Prev Med* 2002;34:397–407. doi:10.1006/pmed.2001.0998.
3. Donnelly TT, Al Khater A-H, Al-Bader SB, *et al.* Arab women’s breast cancer screening practices: a literature review. *Asian Pac J Cancer Prev* 2013;14:4519–28. doi:10.7314/apjcp.2013.14.8.4519.
4. El Saghir NS, Khalil MK, Eid T, *et al.* Trends in epidemiology and management of breast cancer in developing Arab countries: a literature and registry analysis. *Int J Surg* 2007;5:225–33. doi:10.1016/j.ijso.2006.06.015.
5. Harford JB. Breast-cancer early detection in low-income and middle-income countries: do what you can versus one size fits all. *Lancet Oncol* 2011;12:306–12. doi:10.1016/S1470-2045(10)70273-4.
6. Richards MA, Westcombe AM, Love SB, *et al.* Influence of delay on survival in patients with breast cancer: a systematic review. *Lancet* 1999;353:1119–26. doi:10.1016/s0140-6736(99)02143-1.
7. Butler J, Foot C, Bomb M, *et al.* The International Cancer Benchmarking Partnership: an international collaboration to inform cancer policy in Australia, Canada, Denmark, Norway, Sweden and the United Kingdom. *Health Policy* 2013;112:148–55. doi:10.1016/j.healthpol.2013.03.021.
8. Al-Azri MH. Delay in cancer diagnosis: causes and possible solutions. *Oman Med J* 2016;31:325–6. doi:10.5001/omj.2016.65.
9. Macleod U, Mitchell ED, Burgess C, *et al.* Risk factors for delayed presentation and referral of symptomatic cancer: evidence for common cancers. *Br J Cancer* 2009;101:S92–101. doi:10.1038/sj.bjc.6605398.
10. Hisham AN, Yip C-H. Overview of breast cancer in Malaysian women: a problem with late diagnosis. *Asian J Surg.* 2004;27:130–3. doi:10.1016/S1015-9584(09)60326-2.
11. Gorin SS, Heck JE, Cheng B, *et al.* Delays in breast cancer diagnosis and treatment by racial/ethnic group. *Arch Intern Med.* 2006;166:2244–52. doi:10.1001/archinte.166.20.2244.
12. Aziz NM, Rowland JH. Cancer survivorship research among ethnic minority and medically underserved groups. *Oncol Nurs Forum.* 2002;29:789–801. doi:10.1188/02.ONF.789-801.

13. Scott SE, Walter FM, Webster A, *et al.* The model of pathways to treatment: conceptualization and integration with existing theory. *Br J Health Psychol.* 2013;18:45–65. doi:10.1111/j.2044-8287.2012.02077.x.
14. Al-Lawati JA, Al-Zakwani I, Fadhil I, *et al.* Cancer incidence in Oman (1996-2015). *Oman Med J.* 2019;34:271–3. doi:10.5001/omj.2019.55.
15. Kumar S, Burney IA, Al-Ajmi A, *et al.* Changing trends of breast cancer survival in Sultanate of Oman. *J Oncol.* 2011;2011:316243. doi:10.1155/2011/316243.
16. Al-Azri M, Al-Awisi H, Al-Rasbi S, *et al.* Psychosocial impact of breast cancer diagnosis among Omani women. *Oman Med J.* 2014;29:437–44. doi:10.5001/omj.2014.115.
17. Al-Bahri A, Al-Moundhri M, Al-Mandhari Z, *et al.* The role of patients' families in treatment decision-making among adult cancer patients in the Sultanate of Oman. *Eur J Cancer Care (Engl).* 2018;27:e12845. doi:10.1111/ecc.12845.
18. Al-Bahri A, Al-Moundhri M, Al-Mandhari Z, *et al.* Role of the family in treatment decision-making process for Omani women diagnosed with breast cancer. *Patient Educ Couns.* 2019;102:352–9. doi:10.1016/j.pec.2018.08.026.
19. Burney IA, Al Moundhri MS, Rizvi AJ, *et al.* Outcome as a measure of quality of care in oncology: experience at Sultan Qaboos University Hospital, Oman. *Sultan Qaboos Univ Med J.* 2008;8:27–36.
20. Cancer Research UK. Breast Module of the Cancer Awareness Measure (Breast-CAM) Toolkit. Available: [https://www.cancerresearchuk.org/sites/default/files/health\\_professional\\_breast\\_cam\\_toolkit\\_09.02.11.pdf](https://www.cancerresearchuk.org/sites/default/files/health_professional_breast_cam_toolkit_09.02.11.pdf) [Accessed July 2020].
21. Linsell L, Forbes LJJ, Burgess C, *et al.* Validation of a measurement tool to assess awareness of breast cancer. *Eur J Cancer.* 2010;46:1374–81. doi:10.1016/j.ejca.2010.02.034.
22. Forbes LJJ, Simon AE, Warburton F, *et al.* Differences in cancer awareness and beliefs between Australia, Canada, Denmark, Norway, Sweden and the UK (the International Cancer Benchmarking Partnership): do they contribute to differences in cancer survival? *Br J Cancer.* 2013;108:292–300. doi:10.1038/bjc.2012.542.
23. Rose PW, Hamilton W, Aldersey K, *et al.* Development of a survey instrument to investigate the primary care factors related to differences in cancer diagnosis between international jurisdictions. *BMC Fam Pract.* 2014;15:122. doi:10.1186/1471-2296-15-122.

- 1  
2  
3 24. Kim Y, Yoo K-Y, Goodman MT. Differences in incidence, mortality and survival of  
4 breast cancer by regions and countries in Asia and contributing factors. *Asian Pac J*  
5 *Cancer Prev.* 2015;16:2857–70. doi:10.7314/apjcp.2015.16.7.2857.  
6  
7
- 8 25. Al-Azri M, Al-Rubaie K, Al-Ghafri S, *et al.* Barriers and attitudes toward breast cancer  
9 screening among Omani women. *Asian Pac J Cancer Prev.* 2020;21:1339–47.  
10 doi:10.31557/APJCP.2020.21.5.1339.  
11  
12
- 13 26. Karayurt O, Ozmen D, Cetinkaya AC. Awareness of breast cancer risk factors and  
14 practice of breast self examination among high school students in Turkey. *BMC Public*  
15 *Health.* 2008;8:359. doi:10.1186/1471-2458-8-359.  
16  
17
- 18 27. Quaife SL, Forbes LJJ, Ramirez AJ, *et al.* Recognition of cancer warning signs and  
19 anticipated delay in help-seeking in a population sample of adults in the UK. *Br J Cancer.*  
20 2014;110:12–8. doi:10.1038/bjc.2013.684.  
21  
22
- 23 28. Al-Azri M, Al-Saidi M, AL-Mutair E, *et al.* Awareness of risk factors, symptoms and  
24 time to seek medical help of ovarian cancer amongst Omani women attending teaching  
25 hospital in Muscat Governorate, Oman. *Asian Pac J Cancer Prev.* 2018;19:1833–43.  
26 doi:10.22034/APJCP.2018.19.7.1833.  
27  
28
- 29 29. Bish A, Ramirez A, Burgess C, *et al.* Understanding why women delay in seeking help  
30 for breast cancer symptoms. *J Psychosom Res.* 2005;58:321–6.  
31 doi:10.1016/j.jpsychores.2004.10.007.  
32  
33
- 34 30. Ministry of Health, Oman. Ministry of Health Directorate General of Private Health  
35 Establishments referral policy. Available:  
36 [https://www.moh.gov.om/documents/10181/667459/Refferal+Policy.pdf/2705a237-9a47-](https://www.moh.gov.om/documents/10181/667459/Refferal+Policy.pdf/2705a237-9a47-428d-91e3-5a1a08baaa07)  
37 [428d-91e3-5a1a08baaa07](https://www.moh.gov.om/documents/10181/667459/Refferal+Policy.pdf/2705a237-9a47-428d-91e3-5a1a08baaa07) [Accessed July 2020].  
38  
39
- 40 31. Al-Azri MH, Al-Awisi H, Al-Rasbi S, *et al.* Coping with a diagnosis of breast cancer  
41 among Omani women. *J Health Psychol.* 2014;19:836–46.  
42 doi:10.1177/1359105313479813.  
43  
44
- 45 32. Al-Azri M, Al-Awisi H, Al-Moundhri M. Coping with a diagnosis of breast cancer-  
46 literature review and implications for developing countries. *Breast J.* 2009;15:615–22.  
47 doi:10.1111/j.1524-4741.2009.00812.x.  
48  
49
- 50 33. Al-Lawati T, Mehdi I, Al Bahrani B, *et al.* Does alternative and traditional wasam (local  
51 cauterium) therapy facilitate an early and more extensive locoregional metastasis of breast  
52 cancer? *Gulf J Oncolog.* 2016;1:37–42.  
53  
54  
55  
56  
57  
58  
59  
60

- 1  
2  
3 34. Andersen RS, Vedsted P, Olesen F, *et al.* Patient delay in cancer studies: a discussion of  
4 methods and measures. *BMC Health Serv Res.* 2009;9:189. doi:10.1186/1472-6963-9-  
5 189.  
6  
7  
8 35. Coxon D, Campbell C, Walter FM, *et al.* The Aarhus statement on cancer diagnostic  
9 research: turning recommendations into new survey instruments. *BMC Health Serv Res.*  
10 2018;18:677. doi:10.1186/s12913-018-3476-0.  
11  
12 36. Rose PW, Rubin G, Perera-Salazar R, *et al.* Explaining variation in cancer survival  
13 between 11 jurisdictions in the International Cancer Benchmarking Partnership: a primary  
14 care vignette survey. *BMJ Open.* 2015;5:e007212. doi:10.1136/bmjopen-2014-007212.  
15  
16  
17  
18  
19  
20  
21  
22  
23  
24  
25  
26  
27  
28  
29  
30  
31  
32  
33  
34  
35  
36  
37  
38  
39  
40  
41  
42  
43  
44  
45  
46  
47  
48  
49  
50  
51  
52  
53  
54  
55  
56  
57  
58  
59  
60

**Table 1:** Sociodemographic and clinical characteristics as stated by the participants

| <b>Variables</b>                                                 | <b>n (300)</b> | <b>%</b> |
|------------------------------------------------------------------|----------------|----------|
| <b>Age (years) (n = 298)</b>                                     |                |          |
| ≤ 40                                                             | 109            | 36.6     |
| 41–50                                                            | 88             | 29.5     |
| > 50                                                             | 101            | 33.9     |
| <b>Marital status (n = 298)</b>                                  |                |          |
| Single                                                           | 21             | 7.0      |
| Married                                                          | 227            | 76.2     |
| Divorced                                                         | 11             | 3.7      |
| Widowed                                                          | 39             | 13.1     |
| <b>Origin (n = 297)</b>                                          |                |          |
| Muscat                                                           | 102            | 34.3     |
| Ad Dhahirah                                                      | 33             | 11.1     |
| Al Batinah                                                       | 60             | 20.2     |
| Ad Dakhiliyah                                                    | 40             | 13.5     |
| Al Wusta                                                         | 1              | 0.3      |
| Ash Sharqiyah                                                    | 41             | 13.8     |
| Dhofar                                                           | 5              | 1.7      |
| Musandam                                                         | 2              | 0.7      |
| Al Buraimi                                                       | 13             | 4.4      |
| <b>Educational level (n = 298)</b>                               |                |          |
| No formal education                                              | 105            | 35.2     |
| Primary and elementary                                           | 37             | 12.4     |
| High school                                                      | 93             | 31.2     |
| College and above                                                | 63             | 21.1     |
| <b>Employment status (n = 293)</b>                               |                |          |
| Employed                                                         | 97             | 33.1     |
| Unemployed/Housewife                                             | 196            | 66.9     |
| <b>Monthly family income in OMR (n = 281)</b>                    |                |          |
| ≤ 500                                                            | 110            | 39.1     |
| 501–1,000                                                        | 99             | 35.2     |
| > 1,000                                                          | 72             | 25.6     |
| <b>Family history of BC (n = 299)</b>                            |                |          |
| Yes                                                              | 81             | 27.1     |
| No                                                               | 218            | 72.9     |
| <b>If yes, degree of relationship (n = 80)</b>                   |                |          |
| First-degree                                                     | 29             | 36.3     |
| Second-degree                                                    | 32             | 40.0     |
| Third-degree                                                     | 19             | 23.8     |
| <b>Overall length of time since diagnosis (months) (n = 297)</b> |                |          |
| < 3                                                              | 46             | 15.5     |
| 3–6                                                              | 165            | 55.6     |
| 6–12                                                             | 86             | 29.0     |
| <b>Stage of BC at diagnosis (n = 299)</b>                        |                |          |
| Stage I                                                          | 62             | 20.7     |
| Stage II                                                         | 81             | 27.1     |
| Stage III                                                        | 55             | 18.4     |
| Stage IV                                                         | 45             | 15.1     |
| I don't know                                                     | 56             | 18.7     |
| <b>Treatment modality at time of interview (n = 261)</b>         |                |          |
| Radiotherapy                                                     | 135            | 51.7     |
| Hormonal therapy                                                 | 94             | 36.0     |
| Targeted biological therapy                                      | 37             | 14.2     |
| Chemotherapy                                                     | 202            | 77.4     |
| Surgery                                                          | 154            | 59.0     |

1  
2  
3  
4  
5  
6  
7  
8  
9  
10  
11  
12  
13  
14  
15  
16  
17  
18  
19  
20  
21  
22  
23  
24  
25  
26  
27  
28  
29  
30  
31  
32  
33  
34  
35  
36  
37  
38  
39  
40  
41  
42  
43  
44  
45  
46  
47  
48  
49  
50  
51  
52  
53  
54  
55  
56  
57  
58  
59  
60

|                  |    |      |
|------------------|----|------|
| I don't remember | 33 | 12.6 |
|------------------|----|------|

BC: breast cancer; OMR: Omani riyal.

For peer review only

1  
2  
3 **Figure 1:** General knowledge of breast cancer and delays in diagnosis  
4  
5  
6  
7  
8  
9  
10  
11  
12  
13  
14  
15  
16  
17  
18  
19  
20  
21  
22  
23  
24  
25  
26  
27  
28  
29  
30  
31  
32  
33  
34  
35  
36  
37  
38  
39  
40  
41  
42  
43  
44  
45  
46

For peer review only



1  
2  
3  
4  
5  
6  
7  
8  
9  
10  
11  
12  
13  
14  
15  
16  
17  
18  
19  
20  
21  
22  
23  
24  
25  
26  
27  
28  
29  
30  
31  
32  
33  
34  
35  
36  
37  
38  
39  
40  
41  
42  
43  
44  
45  
46

**Figure 2:** Knowledge of specific signs and symptoms of breast cancer

For peer review only

1  
2  
3  
4  
5  
6  
7  
8  
9  
10  
11  
12  
13  
14  
15  
16  
17  
18  
19  
20  
21  
22  
23  
24  
25  
26  
27  
28  
29  
30  
31  
32  
33  
34  
35  
36  
37  
38  
39  
40  
41  
42  
43  
44  
45  
46

**Figure 3:** Barriers to medical help-seeking

For peer review only

**Table 2:** Association between sociodemographic characteristics and knowledge of breast cancer symptoms

| Characteristics                     | Knowledge of BC symptoms, OR (95% CI) |                              |                                     |                            |                    |                         |                  |
|-------------------------------------|---------------------------------------|------------------------------|-------------------------------------|----------------------------|--------------------|-------------------------|------------------|
|                                     | Changes in the position of the nipple | Pain in the breast or armpit | Lump/tumour in the breast or armpit | Redness of the breast skin | Fatigue            | Unexplained weight loss | Loss of appetite |
| <b>Age (years)</b>                  |                                       |                              |                                     |                            |                    |                         |                  |
| ≤ 40                                | 0.71 (0.24–2.07)                      | 1.41 (0.42–0.47)             | 1.12 (0.31–4.0)                     | 0.95 (0.30–2.97)           | 0.69 (0.26–1.82)   | 1.04 (0.37–2.93)        | 0.62 (0.23–1.69) |
| 41–50                               | 0.99 (0.35–2.82)                      | 2.11 (0.61–7.34)             | 1.27 (0.37–4.40)                    | 0.74 (0.27–2.05)           | 0.82 (0.32–2.08)   | 1.11 (0.40–3.06)        | 0.81 (0.31–2.14) |
| > 50                                | 1.0                                   | 1.0                          | 1.0                                 | 1.0                        | 1.0                | 1.0                     | 1.0              |
| <b>Marital status</b>               |                                       |                              |                                     |                            |                    |                         |                  |
| Single                              | 0.68 (0.10–4.45)                      | 0.23 (0.03–1.75)             | 0.39 (0.05–2.88)                    | 2.53 (0.26–24.41)          | 0.37 (0.09–1.58)   | 0.52 (0.10–2.60)        | 0.82 (0.17–3.90) |
| Married                             | 0.605 (0.22–1.69)                     | 0.53 (0.16–1.78)             | 0.82 (0.24–2.82)                    | 1.65 (0.66–4.13)           | 0.97 (0.39–2.39)   | 0.89 (0.33–2.35)        | 1.22 (0.50–2.99) |
| Divorced/Widowed                    | 1.0                                   | 1.0                          | 1.0                                 | 1.0                        | 1.0                | 1.0                     | 1.0              |
| <b>Educational level</b>            |                                       |                              |                                     |                            |                    |                         |                  |
| No formal education                 | 0.16 (0.03–0.81)*                     | 0.10 (0.01–0.86)*            | 0.93 (0.14–6.36)                    | 2.97 (0.05–1.62)           | 1.13 (0.27–4.80)   | 0.29 (0.06–1.42)        | 0.37 (0.09–1.56) |
| Primary and elementary              | 0.49 (0.08–2.87)                      | 0.10 (0.01–0.84)*            | 0.73 (0.11–4.96)                    | 0.27 (0.05–1.47)           | 1.18 (0.27–5.08)   | 0.18 (0.04–0.88)*       | 0.29 (0.07–1.19) |
| High school                         | 0.97 (0.24–3.85)                      | 0.60 (0.09–4.10)             | 7.28 (1.06–50.19)*                  | 1.19 (0.28–5.18)           | 3.82 (1.08–13.58)* | 0.72 (0.19–2.68)        | 1.41 (0.44–4.53) |
| College and above                   | 1.0                                   | 1.0                          | 1.0                                 | 1.0                        | 1.0                | 1.0                     | 1.0              |
| <b>Employment status</b>            |                                       |                              |                                     |                            |                    |                         |                  |
| Employed                            | 0.83 (0.28–2.50)                      | 1.60(0.37–6.83)              | 1.78 (0.38–8.12)                    | 2.53 (0.74–8.59)           | 4.18 (1.34–13.05)* | 1.18 (0.41–3.43)        | 1.45 (0.54–3.95) |
| Unemployed/Housewife                | 1.0                                   | 1.0                          | 1.0                                 | 1.0                        | 1.0                | 1.0                     | 1.0              |
| <b>Monthly family income in OMR</b> |                                       |                              |                                     |                            |                    |                         |                  |
| ≤ 500                               | 1.22 (0.37–4.04)                      | 4.14 (1.14–15.12)*           | 1.54 (0.35–6.80)                    | 3.58 (1.11–11.52)*         | 1.49 (0.51–4.35)   | 1.89 (0.60–5.92)        | 2.66 (0.92–7.72) |
| 501–1,000                           | 0.98 (0.32–2.97)                      | 1.98 (0.58–6.76)             | 0.58 (0.16–2.09)                    | 3.33 (1.07–10.43)*         | 1.15 (0.43–3.06)   | 0.83 (0.30–2.29)        | 1.06 (0.42–2.65) |
| > 1,000                             | 1.0                                   | 1.0                          | 1.0                                 | 1.0                        | 1.0                | 1.0                     | 1.0              |
| <b>Family history of BC</b>         |                                       |                              |                                     |                            |                    |                         |                  |
| Yes                                 | 0.50 (0.20–1.23)                      | 0.48 (0.17–1.41)             | 0.42 (0.13–1.33)                    | 0.54 (0.22–1.32)           | 0.39 (0.17–0.91)   | 0.52 (0.22–1.24)        | 0.73 (0.34–1.56) |
| No                                  | 1.0                                   | 1.0                          | 1.0                                 | 1.0                        | 1.0                | 1.0                     | 1.0              |
| <b>Family history of any cancer</b> |                                       |                              |                                     |                            |                    |                         |                  |
| Yes                                 | 0.74 (0.31–1.75)                      | 0.73 (0.26–2.0)              | 0.93 (0.33–2.58)                    | 1.04 (0.45–2.38)           | 1.61 (0.80–3.26)   | 1.10 (0.50–2.43)        | 1.22 (0.59–2.51) |
| No                                  | 1.0                                   | 1.0                          | 1.0                                 | 1.0                        | 1.0                | 1.0                     | 1.0              |

BC: breast cancer; OR: odds ratio; CI: confidence interval; OMR: Omani riyal.

\*Significant at the p <0.05 level.

**Table 3:** Time taken for medical consultation, referral, and treatment of breast cancer as stated by the participants

| Variables                                                                                                       | n (300) | %    |
|-----------------------------------------------------------------------------------------------------------------|---------|------|
| <b>Initial response upon first noticing possible BC symptoms (n = 296)</b>                                      |         |      |
| Informing husband                                                                                               | 119     | 40.2 |
| Informing family members                                                                                        | 108     | 36.5 |
| Seeing a doctor in a government hospital                                                                        | 25      | 8.4  |
| Seeing a doctor in a local health centre                                                                        | 24      | 8.1  |
| Seeing a doctor in a private sector facility                                                                    | 7       | 2.4  |
| Traveling abroad                                                                                                | 6       | 2.0  |
| Informing friends                                                                                               | 5       | 1.7  |
| Using traditional/herbal medicine                                                                               | 2       | 0.7  |
| <b>Approximate duration of symptom(s) before contacting a doctor (n = 298)</b>                                  |         |      |
| < 1 week                                                                                                        | 93      | 31.2 |
| 1–2 weeks                                                                                                       | 46      | 15.4 |
| 3–4 weeks                                                                                                       | 59      | 19.8 |
| 5–7 weeks                                                                                                       | 24      | 8.1  |
| 2–5 months                                                                                                      | 38      | 12.8 |
| 6–12 months                                                                                                     | 18      | 6.0  |
| > 12 months                                                                                                     | 20      | 6.7  |
| <b>Length of time between contacting a doctor and getting an appointment (n = 294)</b>                          |         |      |
| Same/next day                                                                                                   | 52      | 17.7 |
| < 1 week                                                                                                        | 78      | 26.5 |
| 1–2 weeks                                                                                                       | 61      | 20.7 |
| 3–4 weeks                                                                                                       | 54      | 18.4 |
| 1–2 months                                                                                                      | 35      | 11.9 |
| > 3 months                                                                                                      | 14      | 4.8  |
| <b>Number of medical visits before being diagnosed</b>                                                          |         |      |
| <b>At local health centres (n = 155)</b>                                                                        |         |      |
| 1                                                                                                               | 105     | 67.7 |
| 2                                                                                                               | 27      | 17.4 |
| 3                                                                                                               | 23      | 14.8 |
| <b>At government hospitals (n = 209)</b>                                                                        |         |      |
| 1                                                                                                               | 63      | 30.1 |
| 2                                                                                                               | 44      | 21.1 |
| 3                                                                                                               | 47      | 22.5 |
| ≥ 4                                                                                                             | 55      | 26.3 |
| <b>Length of time between being referred to hospital and getting an appointment with a specialist (n = 296)</b> |         |      |
| < 1 week                                                                                                        | 117     | 39.5 |
| 1–2 weeks                                                                                                       | 94      | 31.8 |
| 3–4 weeks                                                                                                       | 58      | 19.6 |
| 5–7 weeks                                                                                                       | 12      | 4.1  |
| 2–5 months                                                                                                      | 8       | 2.7  |
| 6–12 months                                                                                                     | 3       | 1.0  |
| > 12 months                                                                                                     | 4       | 1.4  |
| <b>Approximate length of time between first medical appointment and diagnosis (n = 297)</b>                     |         |      |
| Same/next day                                                                                                   | 31      | 10.4 |
| < 1 week                                                                                                        | 72      | 24.2 |
| 1–2 weeks                                                                                                       | 92      | 31.0 |
| 3–4 weeks                                                                                                       | 53      | 17.8 |
| 1–2 months                                                                                                      | 30      | 10.1 |
| 3–6 months                                                                                                      | 10      | 3.4  |
| > 6 months                                                                                                      | 9       | 3.0  |
| <b>Length of time between diagnosis and first receiving treatment (n = 294)</b>                                 |         |      |

|            |    |      |
|------------|----|------|
| < 1 week   | 88 | 29.9 |
| 1–2 weeks  | 84 | 28.6 |
| 3–4 weeks  | 58 | 19.7 |
| 1–2 months | 46 | 15.6 |
| > 3 months | 18 | 6.1  |

BC: breast cancer.

For peer review only

**Figure 1:** General knowledge of breast cancer and delays in diagnosis



**Figure 2:** Knowledge of specific signs and symptoms of breast cancer



**Figure 3: Barriers to medical help-seeking**



1  
2  
3  
4  
5  
6  
7  
8  
9  
10  
11  
12  
13  
14  
15  
16  
17  
18  
19  
20  
21  
22  
23  
24  
25  
26  
27  
28  
29  
30  
31  
32  
33  
34  
35  
36  
37  
38  
39  
40  
41  
42  
43  
44  
45  
46  
47  
48  
49  
50  
51  
52  
53  
54  
55  
56  
57  
58  
59  
60STROBE Statement—Checklist of items that should be included in reports of *cross-sectional studies*

|                           | Item No | Recommendation                                                                                                                                                                                    | Page and line number               |
|---------------------------|---------|---------------------------------------------------------------------------------------------------------------------------------------------------------------------------------------------------|------------------------------------|
| <b>Title and abstract</b> | 1       | (a) Indicate the study's design with a commonly used term in the title or the abstract                                                                                                            | Page 1, lines 4 to 5               |
|                           |         | (b) Provide in the abstract an informative and balanced summary of what was done and what was found                                                                                               | Page 2, lines 1 to 27              |
| <b>Introduction</b>       |         |                                                                                                                                                                                                   |                                    |
| Background/rationale      | 2       | Explain the scientific background and rationale for the investigation being reported                                                                                                              | Page 4, line 1 to page 5, line 23  |
| Objectives                | 3       | State specific objectives, including any prespecified hypotheses                                                                                                                                  | Page 5, lines 10 to 12             |
| <b>Methods</b>            |         |                                                                                                                                                                                                   |                                    |
| Study design              | 4       | Present key elements of study design early in the paper                                                                                                                                           | Page 5, line 16                    |
| Setting                   | 5       | Describe the setting, locations, and relevant dates, including periods of recruitment, exposure, follow-up, and data collection                                                                   | Page 5, lines 15 to 23             |
| Participants              | 6       | (a) Give the eligibility criteria, and the sources and methods of selection of participants                                                                                                       | Page 5, line 28 to page 6, line 10 |
| Variables                 | 7       | Clearly define all outcomes, exposures, predictors, potential confounders, and effect modifiers. Give diagnostic criteria, if applicable                                                          | N/A                                |
| Data sources/ measurement | 8*      | For each variable of interest, give sources of data and details of methods of assessment (measurement). Describe comparability of assessment methods if there is more than one group              | Page 6, line 12 to page 7, line 23 |
| Bias                      | 9       | Describe any efforts to address potential sources of bias                                                                                                                                         | Page 7, line 19 to 23.             |
| Study size                | 10      | Explain how the study size was arrived at                                                                                                                                                         | Page 5, line 25 to 30.             |
| Quantitative variables    | 11      | Explain how quantitative variables were handled in the analyses. If applicable, describe which groupings were chosen and why                                                                      | Page 7, line 12 to 17.             |
| Statistical methods       | 12      | (a) Describe all statistical methods, including those used to control for confounding                                                                                                             | Page 7, lines 25 to 31.            |
|                           |         | (b) Describe any methods used to examine subgroups and interactions                                                                                                                               | N/A                                |
|                           |         | (c) Explain how missing data were addressed                                                                                                                                                       | N/A                                |
|                           |         | (d) If applicable, describe analytical methods taking account of sampling strategy                                                                                                                | N/A                                |
|                           |         | (e) Describe any sensitivity analyses                                                                                                                                                             | N/A                                |
| <b>Results</b>            |         |                                                                                                                                                                                                   |                                    |
| Participants              | 13*     | (a) Report numbers of individuals at each stage of study—eg numbers potentially eligible, examined for eligibility, confirmed eligible, included in the study, completing follow-up, and analysed | Page 8, lines 3 to 4               |
|                           |         | (b) Give reasons for non-participation at each stage                                                                                                                                              | N/A                                |
|                           |         | (c) Consider use of a flow diagram                                                                                                                                                                | N/A                                |

|                          |     |                                                                                                                                                                                                              |                                                                   |
|--------------------------|-----|--------------------------------------------------------------------------------------------------------------------------------------------------------------------------------------------------------------|-------------------------------------------------------------------|
| Descriptive data         | 14* | (a) Give characteristics of study participants (eg demographic, clinical, social) and information on exposures and potential confounders                                                                     | Page 7, line 32 to page 8, line 6                                 |
|                          |     | (b) Indicate number of participants with missing data for each variable of interest                                                                                                                          | N/A                                                               |
| Outcome data             | 15* | Report numbers of outcome events or summary measures                                                                                                                                                         | Page 8, line 5 to page 10, line 3                                 |
| Main results             | 16  | (a) Give unadjusted estimates and, if applicable, confounder-adjusted estimates and their precision (eg, 95% confidence interval). Make clear which confounders were adjusted for and why they were included | Page 9, line 1 to line 15                                         |
|                          |     | (b) Report category boundaries when continuous variables were categorized                                                                                                                                    | - Page 8, line 15 to 33.<br>- Page 9, line 17 to Page 10, line 3. |
|                          |     | (c) If relevant, consider translating estimates of relative risk into absolute risk for a meaningful time period                                                                                             | N/A                                                               |
| Other analyses           | 17  | Report other analyses done—eg analyses of subgroups and interactions, and sensitivity analyses                                                                                                               | N/A                                                               |
| <b>Discussion</b>        |     |                                                                                                                                                                                                              |                                                                   |
| Key results              | 18  | Summarise key results with reference to study objectives                                                                                                                                                     | Page 10, lines 7 to 9                                             |
| Limitations              | 19  | Discuss limitations of the study, taking into account sources of potential bias or imprecision. Discuss both direction and magnitude of any potential bias                                                   | Page 13, line 14 to page 14, line 2                               |
| Interpretation           | 20  | Give a cautious overall interpretation of results considering objectives, limitations, multiplicity of analyses, results from similar studies, and other relevant evidence                                   | Page 10, line 6 to page 13, line 12                               |
| Generalisability         | 21  | Discuss the generalisability (external validity) of the study results                                                                                                                                        | N/A                                                               |
| <b>Other information</b> |     |                                                                                                                                                                                                              |                                                                   |
| Funding                  | 22  | Give the source of funding and the role of the funders for the present study and, if applicable, for the original study on which the present article is based                                                | Page 15, lines 6 to 8                                             |

\*Give information separately for exposed and unexposed groups.

**Note:** An Explanation and Elaboration article discusses each checklist item and gives methodological background and published examples of transparent reporting. The STROBE checklist is best used in conjunction with this article (freely available on the Web sites of PLoS Medicine at <http://www.plosmedicine.org/>, Annals of Internal Medicine at <http://www.annals.org/>, and Epidemiology at <http://www.epidem.com/>). Information on the STROBE Initiative is available at [www.strobe-statement.org](http://www.strobe-statement.org).
